# Supplementary material for: Scaling of Rotational Constants
Source: Preprints.org preprint supplement (doi:10.20944/preprints202411.0629.v1), 2024-11-08
Supplement: Supplementary file 1 [file supplementary]

## Sheet: Training set
Experimental Data								Calculated rotational constants											Scale factor and rRMSD calculations
								B3LYP				PBE0				PBEh-3c	r2SCAN-3c		B3LYP-D3(BJ)/def2-SVP					B3LYP-D3(BJ)/def2-TZVP					B3LYP-D4/def2-SVP					B3LYP-D4/def2-TZVP					PBE0-D3(BJ)/def2-SVP					PBE0-D3(BJ)/def2-TZVP					PBE0-D4/def2-SVP
								D3(BJ)		D4		D3(BJ)		D4				Scale Factor	1.00752	±	0.0011635			1.00029	±	0.000971602			1.0076	±	0.00117012			1.00035	±	0.000980029			0.994717	±	0.00112015			0.987689	±	0.000949529			0.994697
								def2-SVP	def2-TZVP	def2-SVP	def2-TZVP	def2-SVP	def2-TZVP	def2-SVP	def2-TZVP						2.74837	2.64509				2.22522	2.22503				2.76465	2.65993				2.24445	2.24417				2.63345	2.57937				2.53033	2.20223
#	Molecule	Brutto	Bexp. [MHz]	Err.(Bexp) [MHz]	Bexp. [cm-1]	Err.(Bexp) [cm-1]	Source	ν [cm-1]	ν [cm-1]	ν [cm-1]	ν [cm-1]	ν [cm-1]	ν [cm-1]	ν [cm-1]	ν [cm-1]	ν [cm-1]	ν [cm-1]		Bcalc/Bexp	(Bcalc/Bexp)^2	Unscaled rRMSD	Scaled rRMSD		Bcalc/Bexp	(Bcalc/Bexp)^2	Unscaled rRMSD	Scaled rRMSD		Bcalc/Bexp	(Bcalc/Bexp)^2	Unscaled rRMSD	Scaled rRMSD		Bcalc/Bexp	(Bcalc/Bexp)^2	Unscaled rRMSD	Scaled rRMSD		Bcalc/Bexp	(Bcalc/Bexp)^2	Unscaled rRMSD	Scaled rRMSD		Bcalc/Bexp	(Bcalc/Bexp)^2	Unscaled rRMSD	Scaled rRMSD		Bcalc/Bexp
3-atomics
3	Water	H2O	835704	101.929	27.8761	0.0034	https://doi.org/10.1063/1.1703330	780456	826764	780176	826456	788566	829425	788421	829267	831677	806072		0.93389	0.87215	0.00437056	0.00349106		0.989302	0.978719	0.000114442	0.000108474		0.933554	0.871524	0.00441501	0.0035228		0.988934	0.977989	0.000122467	0.000114884		0.943594	0.89037	0.00318161	0.00376883		0.992486	0.985028	5.64646e-05	0.000389365		0.943421
1			434921	269.813	14.5074	0.0090		437421	428104	437427	428106	440897	432132	440902	432135	434487	436220		1.00575	1.01153	3.30377e-05	0.000177246		0.984326	0.968897	0.000245687	0.000236949		1.00576	1.01156	3.31968e-05	0.000179629		0.984331	0.968907	0.000245526	0.000234787		1.01374	1.02767	0.000188808	7.03099e-05		0.993586	0.987214	4.11338e-05	0.000347642		1.01375
			278438	62.9564	9.2877	0.0021		280314	282054	280280	282019	282787	284110	282771	284093	285392	283045		1.00674	1.01352	4.53725e-05	0.000204744		1.01299	1.02614	0.000168659	0.000176261		1.00661	1.01327	4.37574e-05	0.000203414		1.01286	1.02589	0.000165419	0.000174717		1.01562	1.03148	0.000243956	0.000105135		1.02037	1.04115	0.000414912	6.0966e-05		1.01556
								b3lyp-d3bj-def2-svp	b3lyp-d3bj-def2-tzvp	b3lyp-d4-def2-svp	b3lyp-d4-def2-tzvp	pbe0-d3bj-def2-svp	pbe0-d3bj-def2-tzvp	pbe0-d4-def2-svp	pbe0-d4-def2-tzvp	pbeh-3c	r2scan-3c
5	Nitrosyl hydride	HNO	553903	2.7			https://doi.org/10.1351/pac197850111239	550154	559449	550130	559423	555046	561154	555033	561140	567536	553924		0.993232	0.98651	4.58022e-05	4.95145e-07		1.01001	1.02012	0.000100243	0.000106105		0.993189	0.986425	4.63865e-05	5.39667e-07		1.00997	1.02003	9.93187e-05	0.000106531		1.00206	1.00413	4.25607e-06	1.04388e-05		1.01309	1.02635	0.000171354	3.82587e-07		1.00204
2			42308.5	0.1				43094.6	43101.2	43094.4	43101.1	43631.9	43610.3	43631.9	43610.3	43794.9	42900.5		1.01858	1.03751	0.000345219	0.00068865		1.01874	1.03782	0.000351043	0.000362036		1.01858	1.0375	0.00034505	0.000692414		1.01873	1.03782	0.000350895	0.000364458		1.03128	1.06354	0.000978394	0.000667241		1.03077	1.06249	0.00094675	0.000326885		1.03128
			39169.5	0.1				39964.1	40018.1	39963.9	40017.9	40452	40465.5	40451.9	40465.4	40657.5	39816.8		1.02029	1.04099	0.000411622	0.000781952		1.02167	1.0438	0.000469442	0.000482178		1.02028	1.04097	0.000411321	0.000785806		1.02166	1.04379	0.000469138	0.000484846		1.03274	1.06656	0.00107211	0.000744582		1.03309	1.06727	0.00109486	0.000414969		1.03274
								b3lyp-d3bj-def2-svp	b3lyp-d3bj-def2-tzvp	b3lyp-d4-def2-svp	b3lyp-d4-def2-tzvp	pbe0-d3bj-def2-svp	pbe0-d3bj-def2-tzvp	pbe0-d4-def2-svp	pbe0-d4-def2-tzvp	pbeh-3c	r2scan-3c
8	Ozone	O3	106536				https://doi.org/10.1016/0022-2852(59)90009-8	115558	114665	115558	114666	119224	117965	119223	117963	118786	112539		1.08468	1.17654	0.00717148	0.00861999		1.0763	1.15842	0.00582138	0.00586841		1.08469	1.17654	0.00717162	0.00863523		1.07631	1.15844	0.00582288	0.00588084		1.11909	1.25236	0.0141825	0.0128093		1.10728	1.22607	0.0115093	0.00877039		1.11909
3			13349.1					13705.9	13627.3	13706	13627.3	14039.3	13963.8	14039.4	13963.9	14161.2	13423.2		1.02673	1.05417	0.000714428	0.00118695		1.02084	1.04211	0.000434163	0.000446405		1.02673	1.05418	0.000714634	0.00119252		1.02084	1.04211	0.000434206	0.000449311		1.0517	1.10607	0.00267285	0.00212922		1.04604	1.09421	0.00212011	0.00110007		1.05171
			11834.5					12252.7	12179.8	12252.7	12179.8	12560.2	12485.8	12560.3	12485.9	12652.8	11992.7		1.03534	1.07193	0.00124892	0.00186004		1.02918	1.05921	0.000851427	0.000868676		1.03534	1.07194	0.00124917	0.00186704		1.02918	1.05921	0.00085154	0.000872814		1.06133	1.12642	0.00376104	0.00310475		1.05504	1.11311	0.00302931	0.00176829		1.06133
								b3lyp-d3bj-def2-svp	b3lyp-d3bj-def2-tzvp	b3lyp-d4-def2-svp	b3lyp-d4-def2-tzvp	pbe0-d3bj-def2-svp	pbe0-d3bj-def2-tzvp	pbe0-d4-def2-svp	pbe0-d4-def2-tzvp	pbeh-3c	r2scan-3c
10	Hypofluorous acid	HOF	590000				https://doi.org/10.1063/1.1676830	582109	585004	582085	584980	589080	591535	589067	591521	592607	584746		0.986626	0.97343	0.000178875	3.54347e-05		0.991532	0.983136	7.17008e-05	6.69828e-05		0.986585	0.973349	0.000179972	3.50481e-05		0.991491	0.983055	7.24002e-05	6.65827e-05		0.998441	0.996884	2.43043e-06	4.67006e-05		1.0026	1.00521	6.76669e-06	9.48929e-05		0.998419
4			26758					27411.3	27136.8	27411.8	27137.3	28215.6	28026.4	28215.8	28026.6	28318.6	26934.4		1.02442	1.04943	0.000596107	0.00103178		1.01416	1.02851	0.000200371	0.000208659		1.02443	1.04946	0.00059702	0.00103792		1.01418	1.02855	0.000200965	0.000211214		1.05447	1.11191	0.00296724	0.00239136		1.0474	1.09705	0.002247	0.00119083		1.05448
			25512.5					26178.6	25933.8	26179	25934.2	26925.9	26758.6	26926	26758.8	27027.1	25748.4		1.02611	1.0529	0.000681576	0.00114418		1.01651	1.0333	0.000272641	0.000282317		1.02612	1.05293	0.00068241	0.00115047		1.01653	1.03333	0.000273243	0.0002852		1.0554	1.11387	0.00306908	0.00248239		1.04884	1.10007	0.00238556	0.00129099		1.05541
								b3lyp-d3bj-def2-svp	b3lyp-d3bj-def2-tzvp	b3lyp-d4-def2-svp	b3lyp-d4-def2-tzvp	pbe0-d3bj-def2-svp	pbe0-d3bj-def2-tzvp	pbe0-d4-def2-svp	pbe0-d4-def2-tzvp	pbeh-3c	r2scan-3c
11	Nitrosyl fluoride	FNO	95189.7	0.81			https://doi.org/10.1039/TF9696501975	97280.2	96173.3	97281.7	96176.7	99230.2	98011.1	99230.2	98011.6	99104.5	95415.3		1.02196	1.04441	0.000482304	0.000879059		1.01033	1.02077	0.000106785	0.000112835		1.02198	1.04444	0.000483007	0.000884558		1.01037	1.02084	0.000107508	0.00011501		1.04245	1.0867	0.00180173	0.00136453		1.02964	1.06016	0.000878555	0.00028781		1.04245
5			11844.1	0.074				12090.2	11772.1	12090.6	11773	12462.6	12217.4	12462.9	12217.7	12658.5	11539.7		1.02078	1.04199	0.000431699	0.000809742		0.993927	0.987892	3.68769e-05	3.35082e-05		1.02082	1.04207	0.000433371	0.000816407		0.993999	0.988035	3.60081e-05	3.19313e-05		1.05223	1.10718	0.00272746	0.00217772		1.03152	1.06403	0.000993374	0.000354165		1.05225
			10508.3	0.079				10753.7	10488.3	10754.1	10489	11072	10863.2	11072.2	10863.5	11224.8	10294.7		1.02335	1.04725	0.000545407	0.000964223		0.998102	0.996207	3.60271e-06	2.60136e-06		1.02339	1.04733	0.000547165	0.000971344		0.99817	0.996343	3.34863e-06	2.18617e-06		1.05365	1.11018	0.00287855	0.00231223		1.03378	1.0687	0.00114111	0.000443269		1.05367
								b3lyp-d3bj-def2-svp	b3lyp-d3bj-def2-tzvp	b3lyp-d4-def2-svp	b3lyp-d4-def2-tzvp	pbe0-d3bj-def2-svp	pbe0-d3bj-def2-tzvp	pbe0-d4-def2-svp	pbe0-d4-def2-tzvp	pbeh-3c	r2scan-3c
18	Hydrogen phosphorus oxide	HPO	247895	26.9813	8.2689	0.0009	https://doi.org/10.1016/0301-0104(80)85216-5	259161	262069	259152	262057	260201	261917	260197	261912	267558	259972		1.04545	1.09296	0.00206529	0.00284191		1.05717	1.11762	0.00326886	0.00330349		1.04541	1.09288	0.00206179	0.00284612		1.05713	1.11752	0.0032634	0.00330605		1.04964	1.10174	0.00246413	0.00194434		1.05656	1.11633	0.00319955	0.00189727		1.04962
6			19278.8	1.49896	0.64307	5e-05		20527.7	21038.9	20527.7	21038.9	20693.5	21194.4	20693.6	21194.5	20972.8	20606.6		1.06479	1.13377	0.0041971	0.00529906		1.0913	1.19093	0.00833551	0.00839254		1.06479	1.13377	0.00419722	0.00531081		1.0913	1.19094	0.00833612	0.00840641		1.07338	1.15215	0.0053849	0.0045848		1.09937	1.20861	0.00987394	0.00736745		1.07339
			17798.1	1.49896	0.59368	5e-05		19021.1	19475.4	19021.1	19475.4	19169	19607.8	19169	19607.8	19448.3	19093.2		1.06872	1.14215	0.00472194	0.00589142		1.09424	1.19736	0.00888148	0.00894051		1.06871	1.14215	0.00472166	0.00590339		1.09424	1.19736	0.00888137	0.00895412		1.07703	1.15998	0.00593288	0.00508872		1.10168	1.2137	0.0103387	0.00776458		1.07703
								b3lyp-d3bj-def2-svp	b3lyp-d3bj-def2-tzvp	b3lyp-d4-def2-svp	b3lyp-d4-def2-tzvp	pbe0-d3bj-def2-svp	pbe0-d3bj-def2-tzvp	pbe0-d4-def2-svp	pbe0-d4-def2-tzvp	pbeh-3c	r2scan-3c
20	Hydrogen sulfide	H2S	310584	0.00033			https://doi.org/10.1016/j.jms.2014.02.002	302464	309301	302394	309228	304064	308762	304025	308722	313815	308216		0.973858	0.9484	0.000683394	0.000354047		0.995872	0.99176	1.70441e-05	1.47754e-05		0.973631	0.947956	0.000695349	0.000359963		0.995635	0.991288	1.90565e-05	1.61195e-05		0.979007	0.958455	0.000440697	0.000684603		0.994133	0.988301	3.44172e-05	0.000327789		0.978883
7			270368	0.00051				264447	266336	264457	266345	265901	268003	265910	268013	267967	266685		0.978103	0.956686	0.000479477	0.000211394		0.985089	0.9704	0.000222345	0.00021403		0.978138	0.956755	0.000477929	0.000208241		0.985122	0.970466	0.000221346	0.000211148		0.983478	0.96723	0.000272961	0.00047164		0.991255	0.982587	7.64711e-05	0.000438805		0.983514
			141820	0.00031				141091	143108	141078	143095	141852	143471	141847	143465	144542	142975		0.994857	0.98974	2.64536e-05	5.47707e-06		1.00908	1.01824	8.2434e-05	8.7753e-05		0.994767	0.989562	2.73802e-05	5.40453e-06		1.00899	1.01805	8.07606e-05	8.72702e-05		1.00023	1.00045	5.17199e-08	2.55714e-05		1.01164	1.02342	0.000135547	6.5843e-07		1.00019
								b3lyp-d3bj-def2-svp	b3lyp-d3bj-def2-tzvp	b3lyp-d4-def2-svp	b3lyp-d4-def2-tzvp	pbe0-d3bj-def2-svp	pbe0-d3bj-def2-tzvp	pbe0-d4-def2-svp	pbe0-d4-def2-tzvp	pbeh-3c	r2scan-3c
21	Thiazyl fluoride	FSN	49719.6	0.031			https://doi.org/10.1016/0022-2860(88)80294-1	48080.2	49042.5	48083.6	49046.3	48462.8	49576	48463.4	49576.8	49166.4	46736.4		0.967027	0.935142	0.0010872	0.000660407		0.986382	0.972949	0.000185459	0.000177862		0.967096	0.935274	0.00108268	0.000653162		0.986458	0.973098	0.000183399	0.000174115		0.974722	0.950084	0.000638956	0.000925807		0.997113	0.994234	8.33568e-06	0.000229892		0.974735
8			8712.44	0.0054				8365.33	8604.68	8365.42	8604.76	8551.05	8816.62	8551.23	8816.8	8722.67	8252.51		0.960159	0.921906	0.00158729	0.00106394		0.987631	0.975415	0.000152995	0.000146093		0.96017	0.921926	0.00158646	0.00105858		0.98764	0.975433	0.000152767	0.000144294		0.981475	0.963294	0.000343162	0.000562154		1.01196	1.02406	0.000142973	2.50634e-07		0.981497
			7393.02	0.0048				7125.58	7320.31	7125.72	7320.45	7268.55	7485.41	7268.69	7485.56	7408.35	7014.01		0.963825	0.928958	0.00130865	0.000836664		0.990164	0.980425	9.67402e-05	9.12545e-05		0.963844	0.928995	0.00130728	0.000831396		0.990184	0.980464	9.63621e-05	8.96406e-05		0.983163	0.96661	0.000283476	0.000485358		1.0125	1.02515	0.000156177	1.06714e-09		0.983183
								b3lyp-d3bj-def2-svp	b3lyp-d3bj-def2-tzvp	b3lyp-d4-def2-svp	b3lyp-d4-def2-tzvp	pbe0-d3bj-def2-svp	pbe0-d3bj-def2-tzvp	pbe0-d4-def2-svp	pbe0-d4-def2-tzvp	pbeh-3c	r2scan-3c
22	Disulfur monoxide	SSO	41914.4				https://doi.org/10.1016/0022-2852(59)90036-0	40102.1	41245.4	40104.6	41247.9	40786.8	41919.9	40785.1	41918.8	41436.7	39060.8		0.956761	0.915391	0.00186962	0.00129903		0.98404	0.968334	0.000254731	0.000245834		0.956821	0.915506	0.00186446	0.00128955		0.984098	0.968448	0.000252886	0.000241989		0.973097	0.946918	0.000723757	0.00102679		1.00013	1.00026	1.75106e-08	0.000148349		0.973056
9			5059					4883.51	5022.24	4883.33	5022.07	4972.49	5100.52	4972.65	5100.62	5069.1	4887.78		0.965312	0.931827	0.00120326	0.000752223		0.992733	0.985518	5.2812e-05	4.87695e-05		0.965276	0.931757	0.00120578	0.000750265		0.9927	0.985452	5.32972e-05	4.83173e-05		0.9829	0.966092	0.000292415	0.000496971		1.00821	1.01648	6.73668e-05	1.76726e-05		0.982931
			4507.1					4353.37	4477.08	4353.26	4476.98	4432.15	4547.25	4432.25	4547.31	4516.57	4344.18		0.965892	0.932947	0.00116335	0.000720505		0.99334	0.986725	4.43497e-05	4.06497e-05		0.965866	0.932898	0.00116511	0.000718022		0.993317	0.986679	4.46615e-05	4.01104e-05		0.98337	0.967017	0.000276546	0.000476325		1.00891	1.01789	7.93401e-05	1.23405e-05		0.983394
								b3lyp-d3bj-def2-svp	b3lyp-d3bj-def2-tzvp	b3lyp-d4-def2-svp	b3lyp-d4-def2-tzvp	pbe0-d3bj-def2-svp	pbe0-d3bj-def2-tzvp	pbe0-d4-def2-svp	pbe0-d4-def2-tzvp	pbeh-3c	r2scan-3c
23	sulfur difluoride	SF2	26930.5	0.00104			https://doi.org/10.1063/1.473716	26286.9	26375.2	26287	26375.5	26496.6	26748.9	26496.5	26749	26631.4	25996.8		0.976101	0.952773	0.00057116	0.000274115		0.979383	0.959191	0.000425067	0.000413606		0.976106	0.952782	0.000570936	0.000271547		0.979394	0.959212	0.000424618	0.000410529		0.983888	0.968035	0.000259605	0.000454124		0.99326	0.986565	4.54292e-05	0.000359774		0.983885
10			9212.13	0.00037				8692.71	9042.05	8692.96	9042.28	8891.05	9253.15	8891.24	9253.3	8963.57	8690.23		0.943615	0.89041	0.00317923	0.00242916		0.981537	0.963415	0.000340875	0.000330597		0.943642	0.890461	0.00317619	0.00241953		0.981562	0.963464	0.000339964	0.000327342		0.965146	0.931507	0.0012148	0.00159624		1.00445	1.00892	1.98238e-05	6.26153e-05		0.965167
			6845.86	0.00027				6532.5	6733.61	6532.65	6733.76	6657.2	6874.93	6657.3	6875.02	6706.36	6513.04		0.954226	0.910547	0.00209529	0.00148968		0.983603	0.967474	0.000268874	0.000259735		0.954247	0.910588	0.00209331	0.0014825		0.983624	0.967516	0.000268179	0.000256958		0.972441	0.945641	0.000759523	0.00106909		1.00425	1.00851	1.8029e-05	6.58821e-05		0.972455
								b3lyp-d3bj-def2-svp	b3lyp-d3bj-def2-tzvp	b3lyp-d4-def2-svp	b3lyp-d4-def2-tzvp	pbe0-d3bj-def2-svp	pbe0-d3bj-def2-tzvp	pbe0-d4-def2-svp	pbe0-d4-def2-tzvp	pbeh-3c	r2scan-3c
25	Sulfur dioxide	SO2	60778.5	0.00294			https://doi.org/10.1016/j.jms.2005.04.010	56526.3	59155.4	56531.4	59160.8	57421.7	59853.4	57423.7	59855.7	59301.2	55050.4		0.930037	0.864969	0.00489479	0.00396481		0.973294	0.9473	0.000713234	0.000698456		0.930121	0.865124	0.00488312	0.00394548		0.973383	0.947475	0.000708443	0.000690321		0.94477	0.89259	0.00305038	0.00362663		0.984779	0.969789	0.000231686	0.000747718		0.944802
11			10318.1	5.1e-05				9969.43	10280	9969.58	10280.1	10092.6	10384.6	10092.7	10384.8	10200.1	9958.49		0.96621	0.933562	0.00114177	0.000703411		0.996308	0.992629	1.36328e-05	1.16116e-05		0.966225	0.933591	0.00114073	0.000698768		0.996322	0.992658	1.35276e-05	1.10708e-05		0.978148	0.956773	0.000477531	0.000730084		1.00645	1.01294	4.16062e-05	3.52798e-05		0.978161
			8799.7	4.5e-05				8474.75	8758.02	8474.98	8758.24	8583.87	8849.27	8584.02	8849.41	8703.16	8432.98		0.963072	0.927508	0.00136365	0.000881084		0.995263	0.990548	2.24436e-05	1.98299e-05		0.963098	0.927558	0.00136173	0.000875266		0.995288	0.990599	2.22003e-05	1.90216e-05		0.975473	0.951548	0.000601572	0.000880927		1.00563	1.0113	3.1729e-05	4.55227e-05		0.97549
								b3lyp-d3bj-def2-svp	b3lyp-d3bj-def2-tzvp	b3lyp-d4-def2-svp	b3lyp-d4-def2-tzvp	pbe0-d3bj-def2-svp	pbe0-d3bj-def2-tzvp	pbe0-d4-def2-svp	pbe0-d4-def2-tzvp	pbeh-3c	r2scan-3c
28	hypochlorous acid	HOCl	613490	11.0923	20.4638	0.00037	https://doi.org/10.1016/0022-2852(85)90232-2	601123	610510	601144	610534	607848	616003	607851	616006	620873	606514		0.979841	0.960089	0.00040638	0.000163538		0.995142	0.990307	2.36016e-05	2.09196e-05		0.979874	0.960153	0.000405048	0.000160822		0.99518	0.990384	2.3228e-05	1.99741e-05		0.990803	0.98169	8.45865e-05	0.000208269		1.0041	1.00821	1.67777e-05	6.8309e-05		0.990807
12			15116.9	0.0287801	0.504245	9.6e-07		14658.3	14970.4	14658.2	14970.3	15065	15419.3	15065.1	15419.4	15336.9	14610.2		0.969662	0.940244	0.000920411	0.000531035		0.990312	0.980719	9.38502e-05	8.84475e-05		0.969655	0.940232	0.000920792	0.000527987		0.990306	0.980707	9.39645e-05	8.73279e-05		0.996567	0.993147	1.17829e-05	7.56469e-05		1.02001	1.04041	0.000400253	5.54945e-05		0.996575
			15116.9	0.0296795	0.504245	9.9e-07		14309.3	14612.1	14309.3	14612.1	14700.6	15042.8	14700.8	15042.9	14967.1	14266.5		0.94658	0.896013	0.00285374	0.00214369		0.96661	0.934335	0.0011149	0.00109653		0.946574	0.896003	0.0028543	0.00213762		0.966605	0.934326	0.00111521	0.0010926		0.972466	0.945689	0.00075814	0.00106745		0.995098	0.99022	2.40316e-05	0.000294205		0.972473
								b3lyp-d3bj-def2-svp	b3lyp-d3bj-def2-tzvp	b3lyp-d4-def2-svp	b3lyp-d4-def2-tzvp	pbe0-d3bj-def2-svp	pbe0-d3bj-def2-tzvp	pbe0-d4-def2-svp	pbe0-d4-def2-tzvp	pbeh-3c	r2scan-3c
29	Nitrosyl chloride	ClNO	87374.5		2.9145		https://doi.org/10.1007/BF01349802	88434.5	89105	88445.3	89115.1	89289.1	89830.6	89289.1	89830.1	88912	88769.2		1.01213	1.02441	0.000147181	0.000389881		1.01981	1.04	0.000392262	0.00040389		1.01226	1.02466	0.000150193	0.000397826		1.01992	1.04024	0.000396878	0.000411311		1.02191	1.04431	0.000480166	0.000272708		1.02811	1.05701	0.000790205	0.000238825		1.02191
13			5737.78		0.191392			5609.95	5652.33	5610.27	5652.64	5782.07	5880.08	5782.58	5880.56	5970.75	5449.12		0.977722	0.95594	0.000496327	0.000222716		0.985107	0.970436	0.000221792	0.000213487		0.977777	0.956048	0.000493855	0.000218879		0.985162	0.970543	0.000220179	0.000210008		1.00772	1.0155	5.95687e-05	5.73251e-06		1.0248	1.05022	0.000615072	0.000148469		1.00781
			5376.24		0.179332			5275.31	5315.17	5275.63	5315.48	5430.41	5518.83	5430.86	5519.25	5595.03	5133.97		0.981227	0.962807	0.000352423	0.000129774		0.988641	0.977411	0.000129029	0.000122691		0.981287	0.962923	0.00035019	0.000126752		0.988699	0.977525	0.000127716	0.000119971		1.01008	1.02026	0.000101544	2.24737e-05		1.02652	1.05375	0.000703517	0.000192844		1.01016
								b3lyp-d3bj-def2-svp	b3lyp-d3bj-def2-tzvp	b3lyp-d4-def2-svp	b3lyp-d4-def2-tzvp	pbe0-d3bj-def2-svp	pbe0-d3bj-def2-tzvp	pbe0-d4-def2-svp	pbe0-d4-def2-tzvp	pbeh-3c	r2scan-3c
32	Dichlorine monoxide	Cl2O	42046.3	0.058			https://doi.org/10.1016/0022-2852(81)90122-3	42014.8	43248.6	42030.1	43262.9	43121.1	44289.4	43119.9	44287.5	43603.9	42277.3		0.99925	0.9985	5.63071e-07	4.57826e-05		1.02859	1.058	0.000817566	0.000834461		0.999615	0.999229	1.48553e-07	5.19664e-05		1.02893	1.05871	0.000837189	0.000858279		1.02556	1.05177	0.000653328	0.000405708		1.05335	1.10954	0.00284584	0.00163047		1.02553
14			3683.08	0.0053				3495.25	3575.99	3494.44	3575.27	3596.49	3694.5	3596.68	3694.73	3701.45	3491.58		0.949002	0.900606	0.00260075	0.0019236		0.970923	0.942692	0.000845454	0.000829397		0.948782	0.900188	0.00262325	0.00193685		0.970727	0.94231	0.000856923	0.000837035		0.976489	0.95353	0.000552785	0.000821981		1.0031	1.00621	9.61625e-06	8.55204e-05		0.97654
			3381.9	0.007				3226.81	3302.89	3226.21	3302.36	3319.62	3410.05	3319.77	3410.23	3411.83	3225.21		0.954141	0.910385	0.00210306	0.00149628		0.976637	0.95382	0.000545831	0.000532869		0.953963	0.910046	0.00211938	0.00150462		0.976479	0.953511	0.000553234	0.000537183		0.981582	0.963504	0.000339208	0.000557118		1.00832	1.01671	6.9248e-05	1.67401e-05		0.981628
								b3lyp-d3bj-def2-svp	b3lyp-d3bj-def2-tzvp	b3lyp-d4-def2-svp	b3lyp-d4-def2-tzvp	pbe0-d3bj-def2-svp	pbe0-d3bj-def2-tzvp	pbe0-d4-def2-svp	pbe0-d4-def2-tzvp	pbeh-3c	r2scan-3c
33	Sulfur dichloride	SCl2	14613.6	0.00057			https://doi.org/10.1006/jmsp.2000.822	14146.4	14604.7	14159	14617	14454.7	14974.1	14455.6	14974.9	14539.5	14380.3		0.968029	0.937081	0.00102213	0.000609545		0.999396	0.998792	3.64957e-07	1.01468e-07		0.968896	0.938759	0.000967482	0.000563756		1.00023	1.00046	5.34318e-08	3.40164e-07		0.989129	0.978375	0.000118188	0.000259115		1.02467	1.04995	0.000608543	0.000145309		0.989189
15			2920.87	0.00013				2718.15	2796.68	2715.73	2794.38	2802.48	2881.63	2802.32	2881.49	2852.85	2750.85		0.930596	0.866008	0.00481696	0.00389427		0.957483	0.916773	0.00180773	0.00178454		0.929768	0.864468	0.00493256	0.00399028		0.956696	0.915267	0.00187527	0.00184621		0.959469	0.920581	0.00164276	0.00207935		0.986568	0.973317	0.000180408	0.000654174		0.959413
			2430.69	0.00012				2280.05	2347.21	2278.67	2345.9	2347.37	2416.58	2347.28	2416.5	2384.9	2309.13		0.938024	0.87989	0.00384097	0.00301615		0.965655	0.93249	0.00117957	0.00116069		0.937459	0.87883	0.00391134	0.00307123		0.965118	0.931454	0.00121673	0.00119314		0.965722	0.932619	0.00117497	0.00155077		0.994196	0.988426	3.36853e-05	0.00032555		0.965684
								b3lyp-d3bj-def2-svp	b3lyp-d3bj-def2-tzvp	b3lyp-d4-def2-svp	b3lyp-d4-def2-tzvp	pbe0-d3bj-def2-svp	pbe0-d3bj-def2-tzvp	pbe0-d4-def2-svp	pbe0-d4-def2-tzvp	pbeh-3c	r2scan-3c
34	Sulfur chloride fluoride	SFCl	22125	0.00057			https://doi.org/10.1063/1.474061	21452.7	21814.6	21452.8	21814.8	21720.7	22234.3	21719.7	22233.5	21711.8	21469.7		0.969613	0.94015	0.000923362	0.000533293		0.985969	0.972134	0.000196882	0.000189055		0.969618	0.940159	0.000923076	0.00052973		0.985978	0.972153	0.000196616	0.000187003		0.981724	0.963781	0.000334026	0.000550505		1.00494	1.0099	2.43729e-05	5.52709e-05		0.98168
16			4721.53	0.00043				4432.87	4582	4432.72	4581.86	4564.5	4709.36	4564.72	4709.55	4653.19	4467.5		0.938864	0.881465	0.00373764	0.00292398		0.970449	0.941772	0.000873243	0.000856931		0.938832	0.881405	0.00374155	0.00291986		0.970418	0.941712	0.000875066	0.000854973		0.966742	0.93459	0.00110611	0.00147192		0.997424	0.994854	6.63829e-06	0.000220681		0.966788
			3883.86	0.000187				3673.75	3786.65	3673.65	3786.55	3771.86	3886.23	3771.98	3886.34	3831.94	3698		0.945902	0.89473	0.00292662	0.00220739		0.97497	0.950566	0.000626509	0.00061264		0.945876	0.894681	0.00292942	0.0022032		0.974946	0.950519	0.000627709	0.000610631		0.971163	0.943157	0.000831576	0.00115381		1.00061	1.00122	3.73858e-07	0.000137046		0.971194
								b3lyp-d3bj-def2-svp	b3lyp-d3bj-def2-tzvp	b3lyp-d4-def2-svp	b3lyp-d4-def2-tzvp	pbe0-d3bj-def2-svp	pbe0-d3bj-def2-tzvp	pbe0-d4-def2-svp	pbe0-d4-def2-tzvp	pbeh-3c	r2scan-3c
38	Titanium dioxide	TiO2	30520.5	0.00165			https://dx.doi.org/10.1086/528934	30612.4	31365.7	30617.6	31368.4	31001.7	31763.4	31005.9	31766.8	32381.6	29981.8		1.00301	1.00603	9.06692e-06	0.000111431		1.02769	1.05615	0.000766759	0.000783109		1.00318	1.00637	1.01043e-05	0.00011664		1.02778	1.05633	0.000771776	0.000792008		1.01577	1.03178	0.00024856	0.000108149		1.04072	1.0831	0.00165816	0.000778895		1.0159
17			8471.76	0.00054				8831.94	8511.47	8835.56	8515.46	8962.83	8665.65	8964.37	8667.35	8932.12	8604.73		1.04252	1.08684	0.00180761	0.00253594		1.00469	1.0094	2.1977e-05	2.47511e-05		1.04294	1.08773	0.00184413	0.00258742		1.00516	1.01034	2.66084e-05	3.03838e-05		1.05797	1.11929	0.00336002	0.00274329		1.02289	1.0463	0.000523826	0.000105986		1.05815
			6613.59	0.00047				6854.39	6694.76	6856.83	6697.36	6952.74	6808.24	6953.88	6809.44	7000.98	6685.89		1.03641	1.07415	0.00132575	0.00195427		1.01227	1.0247	0.000150657	0.000157842		1.03678	1.07491	0.00135273	0.00199415		1.01267	1.02549	0.000160428	0.000169585		1.05128	1.10519	0.00262977	0.00209099		1.02943	1.05973	0.000866221	0.000280856		1.05145
								b3lyp-d3bj-def2-svp	b3lyp-d3bj-def2-tzvp	b3lyp-d4-def2-svp	b3lyp-d4-def2-tzvp	pbe0-d3bj-def2-svp	pbe0-d3bj-def2-tzvp	pbe0-d4-def2-svp	pbe0-d4-def2-tzvp	pbeh-3c	r2scan-3c
40	Hydrogen selenide	H2Se	244939	14.9896	8.1703	0.0005	https://doi.org/10.1063/1.1696127	241335	243127	241287	243078	243387	244017	243359	243988	249434	245070		0.985284	0.970784	0.000216568	5.33576e-05		0.992602	0.985259	5.47255e-05	5.06095e-05		0.985088	0.970399	0.000222365	5.51764e-05		0.992399	0.984856	5.77762e-05	5.25877e-05		0.993663	0.987366	4.0156e-05	0.000134246		0.996235	0.992485	1.41729e-05	0.000256926		0.993548
18			231656	20.9855	7.7272	0.0007		225540	226669	225540	226669	227348	228351	227354	228357	232102	228824		0.9736	0.947897	0.000696956	0.000363901		0.978472	0.957408	0.00046345	0.00045149		0.973602	0.9479	0.000696868	0.000361064		0.978475	0.957414	0.000463308	0.0004486		0.981406	0.963158	0.000345728	0.000565421		0.985735	0.971674	0.000203487	0.000696951		0.981433
			116958	14.9896	3.9013	0.0005		116585	117305	116574	117293	117547	117962	117542	117957	120228	118334		0.996811	0.993633	1.01668e-05	1.85742e-05		1.00297	1.00594	8.79312e-06	1.0575e-05		0.996717	0.993444	1.07801e-05	1.83944e-05		1.00287	1.00574	8.22487e-06	1.03743e-05		1.00504	1.0101	2.53816e-05	7.37859e-08		1.00859	1.01725	7.37155e-05	1.46726e-05		1.005
								b3lyp-d3bj-def2-svp	b3lyp-d3bj-def2-tzvp	b3lyp-d4-def2-svp	b3lyp-d4-def2-tzvp	pbe0-d3bj-def2-svp	pbe0-d3bj-def2-tzvp	pbe0-d4-def2-svp	pbe0-d4-def2-tzvp	pbeh-3c	r2scan-3c
43	Selenium dioxide	SeO2	28826.5	0.0015			https://doi.org/10.1117/12.267756	29453.4	28528.3	29458.1	28532.9	29917.7	29036	29919.9	29038.1	30890	28681.6		1.02175	1.04397	0.000472895	0.000866244		0.989655	0.979418	0.000107009	0.000101238		1.02191	1.0443	0.000480073	0.000880556		0.989814	0.979731	0.000103758	9.67816e-05		1.03785	1.07714	0.00143285	0.00104782		1.00727	1.01458	5.27827e-05	2.63665e-05		1.03793
19			8676.68	0.00042				8495.4	8659.62	8495.92	8660.11	8629.24	8796.83	8629.53	8797.1	8777.22	8519.89		0.979106	0.958649	0.000436545	0.000183021		0.998033	0.99607	3.86891e-06	2.82834e-06		0.979166	0.958766	0.000434048	0.000179425		0.998089	0.996182	3.65083e-06	2.43168e-06		0.994532	0.989095	2.98956e-05	0.000114958		1.01385	1.02789	0.000191751	1.86703e-06		0.994565
			6651.9	0.00043				6593.58	6643.13	6594.13	6643.67	6697.47	6751.41	6697.76	6751.68	6835.07	6568.67		0.991232	0.982542	7.68722e-05	1.71956e-06		0.998682	0.997366	1.73695e-06	1.06619e-06		0.991315	0.982706	7.54284e-05	1.33127e-06		0.998762	0.997526	1.53155e-06	7.84984e-07		1.00685	1.01375	4.69405e-05	2.34727e-06		1.01496	1.03014	0.000223775	6.07331e-06		1.00689
								b3lyp-d3bj-def2-svp	b3lyp-d3bj-def2-tzvp	b3lyp-d4-def2-svp	b3lyp-d4-def2-tzvp	pbe0-d3bj-def2-svp	pbe0-d3bj-def2-tzvp	pbe0-d4-def2-svp	pbe0-d4-def2-tzvp	pbeh-3c	r2scan-3c
46	Hypobromous acid	HOBr	613677	1			https://doi.org/10.1016/0022-2852(89)90013-1	602115	611338	602168	611397	608404	615978	608417	615992	628517	606284		0.981159	0.962673	0.000354988	0.000131344		0.996188	0.992391	1.45283e-05	1.24394e-05		0.981245	0.962841	0.000351768	0.000127709		0.996284	0.992583	1.3805e-05	1.13219e-05		0.991406	0.982886	7.38531e-05	0.000191308		1.00375	1.00751	1.40551e-05	7.40926e-05		0.991428
20			10576.6	0.00145				10319.6	10472.1	10319.5	10471.9	10581.2	10762.6	10581.3	10762.7	10795.3	10314		0.975705	0.952	0.000590265	0.0002875		0.990118	0.980333	9.76611e-05	9.21493e-05		0.975691	0.951973	0.000590923	0.00028549		0.990104	0.980306	9.79281e-05	9.11518e-05		1.00044	1.00087	1.89863e-07	2.35187e-05		1.01759	1.03548	0.000309296	2.56012e-05		1.00045
			10383.1	0.00181				10145.8	10295.7	10145.6	10295.6	10400.3	10577.8	10400.4	10577.9	10613	10141.5		0.977145	0.954812	0.000522351	0.000240393		0.991588	0.983247	7.07572e-05	6.60706e-05		0.977133	0.954789	0.000522895	0.000238501		0.991577	0.983224	7.09538e-05	6.51955e-05		1.00166	1.00333	2.76783e-06	1.31635e-05		1.01876	1.03786	0.000351753	3.86093e-05		1.00167
								b3lyp-d3bj-def2-svp	b3lyp-d3bj-def2-tzvp	b3lyp-d4-def2-svp	b3lyp-d4-def2-tzvp	pbe0-d3bj-def2-svp	pbe0-d3bj-def2-tzvp	pbe0-d4-def2-svp	pbe0-d4-def2-tzvp	pbeh-3c	r2scan-3c
47	Nitrosyl bromide	BrNO	83560				DOI https://doi.org/10.1039/TF9706602414	86821.2	87518.7	86829.3	87525.7	87454.5	87953.7	87450.9	87949.2	87234.8	87252.5		1.03903	1.07958	0.00152319	0.00219436		1.04738	1.097	0.00224448	0.00227293		1.03912	1.07978	0.00153075	0.0022108		1.04746	1.09717	0.00225239	0.00228752		1.04661	1.09539	0.00217226	0.00168743		1.05258	1.10793	0.00276477	0.00157		1.04656
21			3747.12					3666.75	3696.06	3667.14	3696.44	3772.26	3825.86	3772.84	3826.44	3851.31	3613.27		0.978552	0.957564	0.000460022	0.000198448		0.986373	0.972932	0.000185689	0.000178087		0.978655	0.957766	0.000455611	0.000193491		0.986476	0.973135	0.000182898	0.000173626		1.00671	1.01347	4.50268e-05	1.93687e-06		1.02101	1.04247	0.000441613	7.13235e-05		1.00687
			3586.09					3518.17	3546.29	3518.54	3546.66	3616.28	3666.38	3616.81	3666.9	3688.47	3469.58		0.981059	0.962478	0.000358747	0.000133652		0.988902	0.977928	0.000123156	0.000116964		0.981162	0.962679	0.000354862	0.00012959		0.989005	0.97813	0.000120901	0.000113366		1.00842	1.01691	7.08703e-05	9.55391e-06		1.02239	1.04528	0.0005013	9.61095e-05		1.00857
								b3lyp-d3bj-def2-svp	b3lyp-d3bj-def2-tzvp	b3lyp-d4-def2-svp	b3lyp-d4-def2-tzvp	pbe0-d3bj-def2-svp	pbe0-d3bj-def2-tzvp	pbe0-d4-def2-svp	pbe0-d4-def2-tzvp	pbeh-3c	r2scan-3c
50	Hydrogen Telluride	H2Te	187310	0.00743			https://doi.org/10.1006/jmsp.1996.0264	183324	185953	183321	185949	184867	187045	184936	187038	187690	185046		0.978715	0.957884	0.000453036	0.000193834		0.992754	0.98556	5.25103e-05	4.84795e-05		0.978702	0.957858	0.000453593	0.000192166		0.992729	0.985511	5.28679e-05	4.79084e-05		0.986957	0.974084	0.000170124	0.000333328		0.998584	0.99717	2.00485e-06	0.000187938		0.987322
22			182758	0.00723				178605	180147	178590	180132	180463	181737	180426	181736	183730	182712		0.977277	0.955069	0.000516355	0.0002363		0.985715	0.971635	0.000204047	0.00019608		0.977194	0.954909	0.000520092	0.000236596		0.985631	0.971468	0.000206478	0.000196628		0.987442	0.975042	0.000157704	0.000315941		0.994413	0.988857	3.12143e-05	0.000317865		0.987238
			91011.5	0.00519				90466.8	91502.1	90462.3	91497	91319.3	92176.4	91326.4	92174.4	92844.5	91935.7		0.994015	0.988066	3.58174e-05	2.22764e-06		1.00539	1.01081	2.9061e-05	3.2241e-05		0.993966	0.987969	3.64045e-05	2.30333e-06		1.00533	1.0107	2.84579e-05	3.23587e-05		1.00338	1.00678	1.14381e-05	3.6821e-06		1.0128	1.02576	0.000163842	1.10196e-07		1.00346
								b3lyp-d3bj-def2-svp	b3lyp-d3bj-def2-tzvp	b3lyp-d4-def2-svp	b3lyp-d4-def2-tzvp	pbe0-d3bj-def2-svp	pbe0-d3bj-def2-tzvp	pbe0-d4-def2-svp	pbe0-d4-def2-tzvp	pbeh-3c	r2scan-3c
52	Hypoiodous acid	HOI	627757	0.0151			https://doi.org/10.1063/1.1647053	606501	623549	606593	623651	612303	627242	612318	627257	638248	614654		0.966139	0.933425	0.00114654	0.000707184		0.993297	0.986638	4.49346e-05	4.12099e-05		0.966286	0.933708	0.00113666	0.000695553		0.993459	0.986961	4.27831e-05	3.83307e-05		0.975382	0.95137	0.000606038	0.000886302		0.99918	0.99836	6.7307e-07	0.000172157		0.975406
23			8366.22	0.00179				8008.29	8297.9	8007.95	8297.62	8182.41	8504.26	8182.5	8504.38	8347.15	8097.21		0.957217	0.916264	0.00183039	0.00126612		0.991833	0.983733	6.66978e-05	6.21489e-05		0.957176	0.916187	0.00183386	0.00126393		0.9918	0.983667	6.72429e-05	6.16391e-05		0.978029	0.956542	0.000482707	0.000736447		1.0165	1.03327	0.000272237	1.58876e-05		0.97804
			8246.43	0.0023				7903.93	8188.92	7903.61	8188.67	8074.51	8390.5	8074.6	8390.62	8239.39	7991.92		0.958466	0.918658	0.00172505	0.00117813		0.993026	0.986101	4.86329e-05	4.47557e-05		0.958428	0.918584	0.00172822	0.00117585		0.992996	0.98604	4.9063e-05	4.42885e-05		0.979152	0.958739	0.000434638	0.000677086		1.01747	1.03525	0.000305227	2.4454e-05		0.979163
								b3lyp-d3bj-def2-svp	b3lyp-d3bj-def2-tzvp	b3lyp-d4-def2-svp	b3lyp-d4-def2-tzvp	pbe0-d3bj-def2-svp	pbe0-d3bj-def2-tzvp	pbe0-d4-def2-svp	pbe0-d4-def2-tzvp	pbeh-3c	r2scan-3c
53	Nitrosyl iodide	INO	84556	1.9			https://doi.org/10.1016/j.cplett.2016.02.069	86455.1	87234.7	86469.4	87215.9	87022.2	87519.6	87014.7	87498.4	86176.5	86714.2		1.02246	1.04542	0.000504433	0.000909073		1.03168	1.06436	0.00100362	0.00102239		1.02263	1.04577	0.000512058	0.000924022		1.03146	1.0639	0.000989553	0.00101253		1.02917	1.05918	0.00085066	0.000563064		1.03505	1.07133	0.0012284	0.00049758		1.02908
24			2797.5	0.004				2770.23	2825.83	2770.44	2826.01	2842.49	2911.53	2843.13	2912.17	2890.98	2762.44		0.990249	0.980593	9.50806e-05	5.29907e-06		1.01013	1.02036	0.000102556	0.000108485		0.990326	0.980746	9.358e-05	4.6227e-06		1.01019	1.02048	0.000103814	0.000111187		1.01608	1.03242	0.00025864	0.000114796		1.04076	1.08318	0.0016613	0.000781018		1.01631
			2705.62	0.004				2684.22	2737.17	2684.43	2737.31	2752.58	2817.79	2753.17	2818.36	2797.15	2677.16		0.99209	0.984243	6.25673e-05	1.99936e-07		1.01166	1.02346	0.000135973	0.000142798		0.99217	0.984402	6.13067e-05	8.53943e-08		1.01171	1.02357	0.000137217	0.000145688		1.01736	1.03502	0.000301317	0.00014361		1.04146	1.08463	0.00171876	0.000820079		1.01757
4-atomics								b3lyp-d3bj-def2-svp	b3lyp-d3bj-def2-tzvp	b3lyp-d4-def2-svp	b3lyp-d4-def2-tzvp	pbe0-d3bj-def2-svp	pbe0-d3bj-def2-tzvp	pbe0-d4-def2-svp	pbe0-d4-def2-tzvp	pbeh-3c	r2scan-3c
5	hydrogen azide	HN3	611025				https://doi.org/10.1016/0022-2852(80)90112-5	616788	621281	617034	621506	622687	622488	622784	622573	629053	611955		1.00943	1.01895	8.89513e-05	0.000289839		1.01678	1.03385	0.000281714	0.000291552		1.00983	1.01976	9.67069e-05	0.000306453		1.01715	1.0346	0.000294217	0.000306628		1.01909	1.03854	0.000364294	0.000187762		1.01876	1.03787	0.000351983	3.86844e-05		1.01925
25			12034.1					12096.5	12188.3	12095.8	12187.7	12216.2	12292.3	12216	12292.2	12329.3	12148.9		1.00518	1.01038	2.68098e-05	0.000162284		1.01281	1.02579	0.000164164	0.000171664		1.00512	1.01027	2.62238e-05	0.00016274		1.01276	1.02568	0.000162767	0.000171991		1.01513	1.03048	0.000228768	9.52995e-05		1.02145	1.04337	0.000460281	7.88453e-05		1.01511
			11781.5					11863.8	11953.8	11863.2	11953.3	11981.1	12054.3	11981	12054.2	12092.3	11912.4		1.00699	1.01403	4.88373e-05	0.000212088		1.01463	1.02948	0.000214064	0.000222632		1.00694	1.01393	4.81661e-05	0.000212869		1.01458	1.02938	0.000212703	0.000223247		1.01695	1.03418	0.000287205	0.000133971		1.02316	1.04685	0.000536316	0.000111574		1.01693
								b3lyp-d3bj-def2-svp	b3lyp-d3bj-def2-tzvp	b3lyp-d4-def2-svp	b3lyp-d4-def2-tzvp	pbe0-d3bj-def2-svp	pbe0-d3bj-def2-tzvp	pbe0-d4-def2-svp	pbe0-d4-def2-tzvp	pbeh-3c	r2scan-3c
7	Formaldehyde	H2CO	281971	0.0059			https://doi.org/10.1016/j.jms.2012.07.010	280805	284270	280820	284382	281128	283772	281137	283781	288236	281812		0.995867	0.99175	1.70853e-05	1.12747e-05		1.00815	1.01637	6.64848e-05	7.12657e-05		0.99592	0.991856	1.66503e-05	1.21498e-05		1.00855	1.01718	7.31539e-05	7.93528e-05		0.997012	0.994033	8.92726e-06	6.81467e-05		1.00639	1.01282	4.08288e-05	3.59938e-05		0.997045
26			38834	0.00015				38883.5	39161.4	38882.1	39160.9	39131	39377.1	39130.4	39376.5	39492	38969.3		1.00127	1.00255	1.62467e-06	7.75548e-05		1.00843	1.01694	7.1102e-05	7.60446e-05		1.00124	1.00248	1.538e-06	7.82642e-05		1.00842	1.01691	7.08569e-05	7.69588e-05		1.00765	1.01535	5.84916e-05	5.40347e-06		1.01398	1.02816	0.000195559	2.25462e-06		1.00763
			34004.2	0.00015				34154.1	34419.7	34153.3	34420.9	34349.8	34578.8	34349.5	34578.5	34733.1	34235.2		1.00441	1.00883	1.94257e-05	0.000143112		1.01222	1.02459	0.000149294	0.000156446		1.00438	1.00879	1.92159e-05	0.000144337		1.01225	1.02466	0.000150167	0.000159027		1.01016	1.02042	0.000103241	2.32714e-05		1.0169	1.03408	0.000285495	1.9167e-05		1.01015
								b3lyp-d3bj-def2-svp	b3lyp-d3bj-def2-tzvp	b3lyp-d4-def2-svp	b3lyp-d4-def2-tzvp	pbe0-d3bj-def2-svp	pbe0-d3bj-def2-tzvp	pbe0-d4-def2-svp	pbe0-d4-def2-tzvp	pbeh-3c	r2scan-3c
8	Hydrogen peroxide	H2O2	301874	0.0329772	10.0694	1.1e-06	https://doi.org/10.1016/0022-2852(88)90004-5	301033	302375	301031	302373	305007	305836	305004	305833	307839	301241		0.997214	0.994436	7.75998e-06	2.22376e-05		1.00166	1.00332	2.74977e-06	3.78094e-06		0.997207	0.994422	7.79986e-06	2.28779e-05		1.00165	1.00331	2.73127e-06	4.02098e-06		1.01038	1.02086	0.000107711	2.5407e-05		1.01312	1.02642	0.000172258	4.25863e-07		1.01037
27			26192.9	0.0359751	0.873702	1.2e-06		26863.9	26477.4	26865	26478.6	27632.1	27295.6	27632.4	27295.9	27776.2	26152.2		1.02562	1.05189	0.000656276	0.00111108		1.01086	1.02184	0.00011796	0.000124318		1.02566	1.05197	0.000658319	0.00111889		1.01091	1.02193	0.000118929	0.000126816		1.05494	1.11291	0.00301895	0.00243756		1.0421	1.08597	0.00177212	0.000856604		1.05496
			25118.1	0.0359751	0.837848	1.2e-06		25726.8	25534	25726	25533.6	26551	26395.1	26551.1	26395.3	26914.8	25386.3		1.02423	1.04906	0.000587302	0.00102009		1.01656	1.03339	0.000274146	0.00028385		1.0242	1.04899	0.000585772	0.00102296		1.01654	1.03336	0.000273732	0.0002857		1.05705	1.11735	0.00325438	0.00264842		1.05084	1.10427	0.00258482	0.00143677		1.05705
								b3lyp-d3bj-def2-svp	b3lyp-d3bj-def2-tzvp	b3lyp-d4-def2-svp	b3lyp-d4-def2-tzvp	pbe0-d3bj-def2-svp	pbe0-d3bj-def2-tzvp	pbe0-d4-def2-svp	pbe0-d4-def2-tzvp	pbeh-3c	r2scan-3c
9	Isocyanic acid	HNCO	918494				https://doi.org/10.1006/jmsp.1995.1277	935526	898108	937387	899482	955879	886828	956705	887375	943579	832384		1.01854	1.03743	0.000343875	0.000686737		0.977805	0.956103	0.000492619	0.000480294		1.02057	1.04156	0.00042312	0.000802208		0.979301	0.959031	0.000428447	0.000414295		1.0407	1.08306	0.00165677	0.00123941		0.965524	0.932237	0.00118859	0.00214944		1.0416
28			11071					11006.3	11108	11005.7	11107.5	11067.6	11161.9	11067.4	11161.8	11177.3	11076.8		0.994151	0.988337	3.42066e-05	2.65584e-06		1.00334	1.00669	1.11364e-05	1.31321e-05		0.994101	0.988236	3.4803e-05	2.73208e-06		1.00329	1.0066	1.08547e-05	1.33065e-05		0.99969	0.99938	9.60837e-08	3.12634e-05		1.00821	1.01649	6.73886e-05	1.76615e-05		0.999672
			10910.6					10878.3	10972.3	10878	10972	10940.9	11023.2	10940.8	11023.1	11046.5	10931.4		0.99704	0.994089	8.76104e-06	2.06129e-05		1.00565	1.01134	3.19541e-05	3.52855e-05		0.997013	0.994034	8.92344e-06	2.10426e-05		1.00563	1.01129	3.16914e-05	3.58022e-05		1.00278	1.00557	7.72593e-06	6.34116e-06		1.01032	1.02074	0.000106467	4.49145e-06		1.00277
								b3lyp-d3bj-def2-svp	b3lyp-d3bj-def2-tzvp	b3lyp-d4-def2-svp	b3lyp-d4-def2-tzvp	pbe0-d3bj-def2-svp	pbe0-d3bj-def2-tzvp	pbe0-d4-def2-svp	pbe0-d4-def2-tzvp	pbeh-3c	r2scan-3c
12	NO dimer	ONNO	25829.7	0.0009			https://doi.org/10.1016/0022-2852(83)90204-7	26322	26725.7	26327.6	26736.8	26718.1	27071.9	26721.3	27080.4	26972.2	26388.1		1.01906	1.03848	0.000363257	0.000714225		1.03469	1.07058	0.00120325	0.00122385		1.01928	1.03892	0.000371581	0.000730081		1.03512	1.07146	0.00123313	0.00125885		1.03439	1.06997	0.00118282	0.000836799		1.04809	1.09849	0.00231256	0.00123809		1.03452
30			5614.56	0.0002				6859.13	6791.67	6865.05	6796.17	7076.27	7085.71	7082.05	7091.5	7521.43	6746.29		1.22167	1.49248	0.0491375	0.0532961		1.20965	1.46326	0.0439546	0.0440997		1.22272	1.49505	0.0496059	0.05383		1.21046	1.4652	0.0442914	0.044471		1.26034	1.58847	0.067779	0.0643564		1.26203	1.59271	0.0686572	0.0607568		1.26137
			4605.69	0.0005				5441.23	5415.46	5445.19	5418.78	5594.56	5615.84	5598.31	5619.84	5881.36	5372.72		1.18142	1.39574	0.0329115	0.036215		1.17582	1.38256	0.0309131	0.0310314		1.18228	1.39778	0.0332245	0.0365796		1.17654	1.38425	0.0311668	0.0313132		1.21471	1.47551	0.0460988	0.0433843		1.21933	1.48676	0.0481043	0.0417452		1.21552
								b3lyp-d3bj-def2-svp	b3lyp-d3bj-def2-tzvp	b3lyp-d4-def2-svp	b3lyp-d4-def2-tzvp	pbe0-d3bj-def2-svp	pbe0-d3bj-def2-tzvp	pbe0-d4-def2-svp	pbe0-d4-def2-tzvp	pbeh-3c	r2scan-3c
14	formyl fluoride	HFCO	91153.6				https://doi.org/10.1063/1.1731191	91681.9	91553.1	91673	91543.9	92368.4	92239.2	92364.5	92235.2	93377.2	90826.4		1.0058	1.01162	3.35861e-05	0.000178523		1.00438	1.00879	1.92106e-05	2.18088e-05		1.0057	1.01143	3.2469e-05	0.000177917		1.00428	1.00858	1.83352e-05	2.14875e-05		1.01333	1.02683	0.000177594	6.35689e-05		1.01191	1.02396	0.000141834	3.00045e-07		1.01328
31			11760					11748	11723.4	11748.4	11723.8	11876	11866.1	11876.2	11866.3	11907.1	11681.1		0.998977	0.997956	1.04578e-06	4.21458e-05		0.996886	0.993782	9.69655e-06	8.00364e-06		0.999012	0.998025	9.76124e-07	4.35815e-05		0.996922	0.993853	9.47414e-06	7.43703e-06		1.00986	1.01982	9.72255e-05	2.04772e-05		1.00902	1.01812	8.13613e-05	1.15706e-05		1.00988
			10396.8					10413.6	10392.6	10413.8	10392.8	10523	10513.6	10523.1	10513.7	10560.5	10350		1.00162	1.00323	2.60862e-06	8.37148e-05		0.999597	0.999193	1.62677e-07	1.38531e-08		1.00163	1.00327	2.67295e-06	8.54601e-05		0.999617	0.999235	1.46551e-07	9.58071e-10		1.01214	1.02442	0.000147333	4.61168e-05		1.01123	1.02259	0.000126127	1.48401e-06		1.01215
								b3lyp-d3bj-def2-svp	b3lyp-d3bj-def2-tzvp	b3lyp-d4-def2-svp	b3lyp-d4-def2-tzvp	pbe0-d3bj-def2-svp	pbe0-d3bj-def2-tzvp	pbe0-d4-def2-svp	pbe0-d4-def2-tzvp	pbeh-3c	r2scan-3c
15	difluoramine	NHF2	53017.1				https://doi.org/10.1063/1.1733680	54630.3	53346.2	54628.5	53344.5	55880	54666.7	55879.1	54665.9	55113	52616.3		1.03043	1.06178	0.000925794	0.00145756		1.00621	1.01245	3.85244e-05	4.21763e-05		1.03039	1.06171	0.00092375	0.00146087		1.00618	1.01239	3.81376e-05	4.26375e-05		1.054	1.11091	0.00291581	0.00234546		1.03111	1.0632	0.000968119	0.000339334		1.05398
32			10895.4					10869.2	10778.6	10869.5	10778.9	11134.5	11064.5	11134.7	11064.7	11227.9	10709.3		0.997595	0.995195	5.78516e-06	2.59996e-05		0.989278	0.978671	0.000114962	0.00010898		0.997622	0.995251	5.65268e-06	2.70559e-05		0.989307	0.978729	0.00011433	0.000107005		1.02194	1.04437	0.000481462	0.000273681		1.01551	1.03127	0.000240685	9.07511e-06		1.02196
			9307.22					9351.05	9247.51	9351.22	9247.7	9579.15	9493.78	9579.27	9493.9	9625.18	9182.01		1.00471	1.00944	2.21819e-05	0.000150492		0.993585	0.987211	4.11534e-05	3.75913e-05		1.00473	1.00948	2.23538e-05	0.000152795		0.993605	0.987251	4.08973e-05	3.65463e-05		1.02922	1.05929	0.000853667	0.000565497		1.02004	1.04049	0.000401784	5.60585e-05		1.02923
								b3lyp-d3bj-def2-svp	b3lyp-d3bj-def2-tzvp	b3lyp-d4-def2-svp	b3lyp-d4-def2-tzvp	pbe0-d3bj-def2-svp	pbe0-d3bj-def2-tzvp	pbe0-d4-def2-svp	pbe0-d4-def2-tzvp	pbeh-3c	r2scan-3c
26	Disulfane	H2S2	146858	0.0046			https://doi.org/10.1016/0022-2852(89)90177-X	143974	146589	143973	146590	144781	146956	144779	146953	147358	145214		0.980359	0.961103	0.000385787	0.000150477		0.99817	0.996343	3.34967e-06	2.38698e-06		0.980353	0.961091	0.000386021	0.000148829		0.998172	0.996348	3.34103e-06	2.18002e-06		0.985858	0.971917	0.000199986	0.000374421		1.00067	1.00134	4.46881e-07	0.000135729		0.985845
33			6970.43	0.00062				6702.62	6868.33	6700.88	6866.65	6874.33	7046.73	6873.98	7046.32	6969.84	6795.13		0.96158	0.924636	0.00147612	0.000972627		0.985353	0.97092	0.000214537	0.000206369		0.961329	0.924154	0.00149542	0.00098391		0.985111	0.970443	0.000221685	0.00021148		0.986213	0.972617	0.00019007	0.000360877		1.01095	1.02201	0.000119818	2.24754e-06		0.986163
			6967.59	0.00061				6700.4	6868.28	6698.61	6866.56	6870.7	7045.93	6870.33	7045.49	6966.91	6790.96		0.961652	0.924775	0.00147057	0.000968087		0.985747	0.971698	0.000203139	0.000195189		0.961396	0.924283	0.00149023	0.000979671		0.9855	0.97121	0.000210261	0.000200321		0.986094	0.972381	0.00019338	0.000365409		1.01124	1.02261	0.000126406	1.45423e-06		0.986041
								b3lyp-d3bj-def2-svp	b3lyp-d3bj-def2-tzvp	b3lyp-d4-def2-svp	b3lyp-d4-def2-tzvp	pbe0-d3bj-def2-svp	pbe0-d3bj-def2-tzvp	pbe0-d4-def2-svp	pbe0-d4-def2-tzvp	pbeh-3c	r2scan-3c
27	Thioformaldehyde	H2CS	291613				https://doi.org/10.1051/0004-6361/20183451	290296	295590	290341	295633	290060	294441	290080	294460	296862	292306		0.995484	0.990989	2.03914e-05	8.83672e-06		1.01364	1.02746	0.000186007	0.000193992		0.995638	0.991295	1.90258e-05	1.02537e-05		1.01378	1.02776	0.000189991	0.000199956		0.994675	0.989378	2.83571e-05	0.000111937		1.0097	1.01949	9.40485e-05	7.46428e-06		0.994743
34			17699					17592.3	17800.1	17590.1	17797.9	17748.3	17939.5	17747.6	17938.8	17980.5	17605.8		0.993973	0.987981	3.633e-05	2.10114e-06		1.00571	1.01146	3.26443e-05	3.60107e-05		0.993845	0.987728	3.78824e-05	1.94742e-06		1.00559	1.01121	3.12484e-05	3.5331e-05		1.00279	1.00558	7.75622e-06	6.31391e-06		1.01359	1.02736	0.000184574	1.22764e-06		1.00275
			16652.5					16587.1	16789.1	16585.3	16787.3	16724.9	16909.2	16724.4	16908.7	16953.7	16605.6		0.996074	0.992163	1.54147e-05	1.27207e-05		1.0082	1.01647	6.72905e-05	7.21e-05		0.995962	0.991941	1.63036e-05	1.24516e-05		1.00809	1.01625	6.55212e-05	7.13918e-05		1.00435	1.00872	1.89139e-05	9.15861e-07		1.01542	1.03107	0.00023767	8.50427e-06		1.00432
								b3lyp-d3bj-def2-svp	b3lyp-d3bj-def2-tzvp	b3lyp-d4-def2-svp	b3lyp-d4-def2-tzvp	pbe0-d3bj-def2-svp	pbe0-d3bj-def2-tzvp	pbe0-d4-def2-svp	pbe0-d4-def2-tzvp	pbeh-3c	r2scan-3c
28	Thionyl Fluoride	F2SO	8614.8	0.0021			https://doi.org/10.1016/j.jms.2018.08.003	8113.98	8329.54	8114.32	8329.9	8277.28	8513.61	8277.48	8513.82	8334.59	7978.77		0.941865	0.887109	0.0033797	0.00260612		0.966887	0.93487	0.00109648	0.00107826		0.941904	0.887183	0.00337513	0.00259489		0.966929	0.934952	0.00109367	0.00107127		0.96082	0.923176	0.00153505	0.00195858		0.988253	0.976645	0.000137985	0.000571814		0.960844
35			8356.95	0.0021				7953.87	8233.35	7954.1	8233.58	8074.43	8366.16	8074.57	8366.31	8143.25	7910.75		0.951767	0.905861	0.00232642	0.00168703		0.98521	0.970638	0.000218752	0.000210504		0.951795	0.905913	0.00232375	0.0016789		0.985238	0.970693	0.000217924	0.000207805		0.966193	0.933529	0.00114291	0.00151409		1.0011	1.00221	1.21591e-06	0.000125921		0.96621
			4952.94	0.0026				4690.15	4839.79	4690.32	4839.95	4778.31	4937.27	4778.42	4937.38	4799.47	4646.38		0.946943	0.8967	0.00281509	0.00210995		0.977153	0.954829	0.000521968	0.000509287		0.946976	0.896764	0.00281154	0.00210036		0.977188	0.954896	0.000520405	0.00050483		0.964742	0.930727	0.00124313	0.00162851		0.996836	0.993682	1.00104e-05	0.000238256		0.964764
								b3lyp-d3bj-def2-svp	b3lyp-d3bj-def2-tzvp	b3lyp-d4-def2-svp	b3lyp-d4-def2-tzvp	pbe0-d3bj-def2-svp	pbe0-d3bj-def2-tzvp	pbe0-d4-def2-svp	pbe0-d4-def2-tzvp	pbeh-3c	r2scan-3c
30	chloramine	NH2Cl	269981	1.34907	9.00561	4.5e-05	https://doi.org/10.1006/jmsp.1999.7998	266899	271337	266916	271355	269650	273228	269656	273234	274106	266726		0.988583	0.977296	0.000130347	1.58448e-05		1.00502	1.01007	2.52101e-05	2.81764e-05		0.988645	0.977418	0.000128944	1.47801e-05		1.00509	1.0102	2.5875e-05	2.95995e-05		0.998773	0.997547	1.5065e-06	4.23013e-05		1.01203	1.0242	0.000144645	1.86443e-07		0.998793
36			14194.9	0.209855	0.473491	7e-06		13865.1	14048.2	13864.7	14047.7	14261.1	14466.3	14261.2	14466.5	14454.5	13789		0.976769	0.954077	0.000539698	0.000252297		0.989662	0.97943	0.00010688	0.000101113		0.976735	0.954011	0.000541276	0.000251063		0.989631	0.979369	0.000107517	0.000100414		1.00466	1.00935	2.17322e-05	4.1717e-07		1.01912	1.03861	0.000365672	4.32514e-05		1.00467
			13868.5	0.239834	0.462605	8e-06		13575.3	13738.1	13574.8	13737.6	13947.8	14136	13947.9	14136.1	14125.4	13516.3		0.978855	0.958157	0.000447107	0.000189934		0.990592	0.981272	8.85182e-05	8.3272e-05		0.978819	0.958087	0.000448633	0.000188918		0.990559	0.981207	8.91373e-05	8.2675e-05		1.00571	1.01146	3.26555e-05	1.61021e-07		1.01928	1.03894	0.000371878	4.53763e-05		1.00572
								b3lyp-d3bj-def2-svp	b3lyp-d3bj-def2-tzvp	b3lyp-d4-def2-svp	b3lyp-d4-def2-tzvp	pbe0-d3bj-def2-svp	pbe0-d3bj-def2-tzvp	pbe0-d4-def2-svp	pbe0-d4-def2-tzvp	pbeh-3c	r2scan-3c
31	Formyl chloride	COHCl	77969	0.28			https://doi.org/10.1063/1.432083	78610.8	78759.2	78588.9	78737.1	79055	79220	79044.9	79209.7	79882.4	77777.8		1.00823	1.01653	6.77543e-05	0.000250131		1.01014	1.02037	0.000102719	0.000108653		1.00795	1.01597	6.32226e-05	0.000243634		1.00985	1.0198	9.70475e-05	0.000104178		1.01393	1.02805	0.000194012	7.34825e-05		1.01605	1.03235	0.000257456	1.25129e-05		1.0138
37			6140.79	0.11				6030.4	6056.39	6030.49	6056.48	6139.61	6173.31	6139.9	6173.6	6230.61	6011.36		0.982024	0.96437	0.000323152	0.000112134		0.986256	0.972701	0.000188895	0.000181228		0.982038	0.964398	0.000322639	0.000110281		0.986271	0.97273	0.000188499	0.000179087		0.999808	0.999617	3.67517e-08	2.99617e-05		1.00529	1.01062	2.80363e-05	5.01379e-05		0.999854
			5685.29	0.11				5600.75	5623.93	5600.72	5623.89	5697.16	5727.02	5697.35	5727.22	5779.8	5580.08		0.985131	0.970483	0.000221092	5.56321e-05		0.989206	0.978529	0.000116501	0.000110479		0.985125	0.970471	0.000221276	5.46303e-05		0.9892	0.978517	0.00011664	0.00010924		1.00209	1.00418	4.3569e-06	1.02832e-05		1.00734	1.01473	5.38778e-05	2.56114e-05		1.00212
								b3lyp-d3bj-def2-svp	b3lyp-d3bj-def2-tzvp	b3lyp-d4-def2-svp	b3lyp-d4-def2-tzvp	pbe0-d3bj-def2-svp	pbe0-d3bj-def2-tzvp	pbe0-d4-def2-svp	pbe0-d4-def2-tzvp	pbeh-3c	r2scan-3c
33	Thiophosgene	Cl2CS	3557.31	0.000299792	0.118659	1e-08	https://doi.org/10.1016/j.jms.2009.12.004	3498.31	3528.97	3497.79	3528.46	3560.66	3593.48	3560.79	3593.61	3599.45	3515.96		0.983414	0.967104	0.000275085	8.44221e-05		0.992034	0.984132	6.34529e-05	5.90171e-05		0.983269	0.966818	0.000279927	8.5766e-05		0.991891	0.983848	6.57567e-05	6.02161e-05		1.00094	1.00188	8.87301e-07	1.88881e-05		1.01017	1.02044	0.0001034	5.1401e-06		1.00098
38			3464.11	0.000299792	0.11555	1e-08		3405.58	3440.35	3405.78	3440.72	3452.1	3485.72	3452.6	3486.31	3506	3402.83		0.983103	0.966491	0.00028552	9.02908e-05		0.99314	0.986326	4.70653e-05	4.3252e-05		0.983163	0.966609	0.000283493	8.77604e-05		0.993248	0.986541	4.55942e-05	4.09948e-05		0.996532	0.993075	1.20294e-05	7.62662e-05		1.00624	1.01252	3.89246e-05	3.78029e-05		0.996677
			1753.1	0.000209855	0.0584771	7e-09		1725.66	1742.05	1725.59	1742.02	1752.77	1769.39	1752.93	1769.58	1776.06	1729.24		0.984348	0.96894	0.000244997	6.80262e-05		0.993696	0.987431	3.97459e-05	3.62463e-05		0.984306	0.968859	0.00024629	6.74985e-05		0.993679	0.987399	3.99495e-05	3.56503e-05		0.999811	0.999622	3.56963e-08	2.99315e-05		1.00929	1.01867	8.63553e-05	9.81071e-06		0.999903
								b3lyp-d3bj-def2-svp	b3lyp-d3bj-def2-tzvp	b3lyp-d4-def2-svp	b3lyp-d4-def2-tzvp	pbe0-d3bj-def2-svp	pbe0-d3bj-def2-tzvp	pbe0-d4-def2-svp	pbe0-d4-def2-tzvp	pbeh-3c	r2scan-3c
34	Carbonic chloride fluoride	COFCl	11830.3	0	0.394618		https://doi.org/10.1006/jmsp.2001.8415	11815.9	11800.6	11816	11800.7	11933.1	11925.1	11933.1	11925.1	11960.5	11739.9		0.998778	0.997558	1.4929e-06	3.95801e-05		0.997483	0.994973	6.3328e-06	4.97949e-06		0.998785	0.997572	1.47536e-06	4.06183e-05		0.997491	0.994988	6.29461e-06	4.65605e-06		1.00869	1.01745	7.54315e-05	1.12641e-05		1.00801	1.01608	6.4161e-05	1.93522e-05		1.00869
39			5286.91	0	0.176352			5195.07	5224.34	5195.13	5224.41	5282.01	5310.36	5282.21	5310.57	5367.97	5210.74		0.982628	0.965559	0.000301772	9.95997e-05		0.988164	0.976468	0.000140087	0.000133482		0.98264	0.965582	0.000301354	9.78977e-05		0.988178	0.976496	0.00013976	0.000131656		0.999073	0.998147	8.59348e-07	3.85039e-05		1.00444	1.00889	1.96696e-05	6.28868e-05		0.999111
			3648.71	0	0.121708			3608.52	3621.17	3608.56	3621.22	3661.36	3674.2	3661.46	3674.3	3705.1	3608.92		0.988986	0.978093	0.00012131	1.2778e-05		0.992454	0.984966	5.69361e-05	5.27368e-05		0.988996	0.978114	0.000121077	1.21799e-05		0.992466	0.984989	5.67561e-05	5.16144e-05		1.00347	1.00695	1.20308e-05	3.3592e-06		1.00699	1.01402	4.88311e-05	2.92536e-05		1.0035
								b3lyp-d3bj-def2-svp	b3lyp-d3bj-def2-tzvp	b3lyp-d4-def2-svp	b3lyp-d4-def2-tzvp	pbe0-d3bj-def2-svp	pbe0-d3bj-def2-tzvp	pbe0-d4-def2-svp	pbe0-d4-def2-tzvp	pbeh-3c	r2scan-3c
35	Phosgene	CCl2O	7918.79	0.07			https://doi.org/10.1016/0022-2852(80)90315-X	7818.89	7883.42	7820.11	7884.71	7918.89	7978.89	7919.17	7979.19	8021.17	7832.4		0.987385	0.974929	0.000159139	2.69112e-05		0.995534	0.991088	1.99471e-05	1.7487e-05		0.987538	0.975231	0.0001553	2.45965e-05		0.995697	0.991412	1.85188e-05	1.56251e-05		1.00001	1.00002	1.46488e-10	2.77834e-05		1.00759	1.01524	5.75999e-05	2.31797e-05		1.00005
40			3474.95	0.03				3406.61	3419.98	3405.88	3419.25	3476.44	3494.31	3476.6	3494.49	3528.88	3411.41		0.980333	0.961053	0.000386777	0.0001511		0.984181	0.968613	0.000250228	0.00024141		0.980123	0.960642	0.000395082	0.000154519		0.98397	0.968197	0.000256967	0.000245982		1.00043	1.00086	1.82721e-07	2.35986e-05		1.00557	1.01117	3.10293e-05	4.63589e-05		1.00048
			2412.21	0.03				2372.8	2385.23	2372.56	2384.99	2415.86	2430.07	2415.97	2430.19	2450.7	2376.37		0.983662	0.967592	0.000266915	7.989e-05		0.988812	0.977748	0.000125181	0.000118938		0.983562	0.967394	0.00027021	8.03862e-05		0.988712	0.977552	0.000127414	0.000119678		1.00151	1.00303	2.28453e-06	1.4285e-05		1.0074	1.01486	5.4807e-05	2.49852e-05		1.00156
								b3lyp-d3bj-def2-svp	b3lyp-d3bj-def2-tzvp	b3lyp-d4-def2-svp	b3lyp-d4-def2-tzvp	pbe0-d3bj-def2-svp	pbe0-d3bj-def2-tzvp	pbe0-d4-def2-svp	pbe0-d4-def2-tzvp	pbeh-3c	r2scan-3c
38	thionyl chloride	SOCl2	5086.75	4.7e-05			https://doi.org/10.1039/FT9949003473	4752.58	4997.86	4755.14	5000.19	4870.03	5116.39	4870.56	5116.86	4949.77	4856.83		0.934305	0.872927	0.00431577	0.00344174		0.982526	0.965358	0.000305326	0.000295593		0.93481	0.873869	0.00424976	0.00337426		0.982984	0.966257	0.000289547	0.000277891		0.957395	0.916605	0.00181518	0.00227175		1.00583	1.01169	3.39466e-05	4.298e-05		0.957499
41			2822.53	4.9e-05				2605.2	2688.3	2602.3	2685.71	2711.14	2794.08	2710.97	2793.94	2775.7	2597.43		0.923	0.851929	0.005929	0.00490797		0.952444	0.90715	0.00226153	0.00223572		0.921973	0.850035	0.00608818	0.00504419		0.951527	0.905404	0.0023496	0.00231724		0.960537	0.922631	0.00155735	0.00198362		0.98992	0.979942	0.000101601	0.000495784		0.960475
			1960.31	4.1e-05				1809.05	1884.16	1807.99	1883.18	1876.51	1951.84	1876.52	1951.85	1918.5	1824.2		0.922839	0.851632	0.00595379	0.00493069		0.961155	0.923818	0.00150896	0.00148769		0.922295	0.850628	0.00603806	0.00499823		0.960652	0.922852	0.00154827	0.00152178		0.957252	0.916331	0.00182739	0.00228534		0.995679	0.991376	1.86729e-05	0.000274849		0.957255
								b3lyp-d3bj-def2-svp	b3lyp-d3bj-def2-tzvp	b3lyp-d4-def2-svp	b3lyp-d4-def2-tzvp	pbe0-d3bj-def2-svp	pbe0-d3bj-def2-tzvp	pbe0-d4-def2-svp	pbe0-d4-def2-tzvp	pbeh-3c	r2scan-3c
43	Nitryl chloride	ClNO2	13290.1	0.002			https://doi.org/10.1063/1.2920487	13367.8	13411.6	13367.9	13411.7	13546.2	13573	13546.2	13573.1	13638.4	13320.1		1.00584	1.01172	3.41622e-05	0.000179858		1.00914	1.01836	8.34748e-05	8.88271e-05		1.00585	1.01174	3.42807e-05	0.000182157		1.00915	1.01838	8.36474e-05	9.02712e-05		1.01927	1.0389	0.000371174	0.000192684		1.02129	1.04303	0.00045318	7.59581e-05		1.01927
42			5175.55	7e-05				4947.32	5032.12	4947.45	5032.25	5120.08	5230.78	5120.55	5231.24	5349.27	4922.14		0.955902	0.913748	0.00194467	0.00136219		0.972287	0.945341	0.000768026	0.000752704		0.955928	0.913798	0.00194235	0.00135496		0.972312	0.94539	0.000766645	0.000747809		0.989282	0.97868	0.000114868	0.000254213		1.01067	1.02146	0.000113867	3.13674e-06		0.989374
			3719.52	8e-05				3610.94	3659.17	3611.02	3659.25	3715.66	3775.7	3715.92	3775.95	3842.26	3594.04		0.970808	0.942468	0.000852166	0.000479136		0.983775	0.967814	0.000263239	0.000254196		0.97083	0.942511	0.000850872	0.000474987		0.983796	0.967855	0.000262563	0.00025146		0.998964	0.997928	1.07424e-06	3.98668e-05		1.0151	1.03044	0.00022815	6.8024e-06		0.999032
								b3lyp-d3bj-def2-svp	b3lyp-d3bj-def2-tzvp	b3lyp-d4-def2-svp	b3lyp-d4-def2-tzvp	pbe0-d3bj-def2-svp	pbe0-d3bj-def2-tzvp	pbe0-d4-def2-svp	pbe0-d4-def2-tzvp	pbeh-3c	r2scan-3c
45	Disulfur dichloride	ClSSCl	5533.9	0.0011			https://doi.org/10.1016/j.jms.2008.04.012	5339.72	5564.76	5343.43	5568.55	5483.24	5732.75	5482.95	5732.53	5519.27	5468.48		0.964912	0.931054	0.0012312	0.000774516		1.00558	1.01118	3.10979e-05	3.43853e-05		0.965581	0.932347	0.00118465	0.000733491		1.00626	1.01256	3.9209e-05	4.37703e-05		0.990846	0.981777	8.37887e-05	0.000207023		1.03593	1.07316	0.00129119	0.00053732		0.990794
44			1393.84	0.0003				1296.39	1317.52	1294.77	1315.97	1334.45	1354.84	1334.48	1354.85	1369.3	1281.17		0.930082	0.865052	0.00488858	0.00395918		0.945243	0.893485	0.00299831	0.0029688		0.928924	0.8629	0.00505179	0.00409841		0.944131	0.891383	0.00312138	0.00308435		0.957389	0.916593	0.00181572	0.00227235		0.97202	0.944822	0.000782902	0.00159572		0.957407
			1232.67	0.0002				1152.37	1173.92	1151.09	1172.71	1186.91	1208.97	1186.91	1208.96	1218.6	1140.58		0.934853	0.873951	0.00424408	0.00337728		0.952336	0.906943	0.00227188	0.00224601		0.933818	0.872015	0.0043801	0.00349139		0.951353	0.905073	0.00236653	0.00233406		0.962878	0.927135	0.00137801	0.00178156		0.980767	0.961905	0.000369894	0.000980093		0.962874
								b3lyp-d3bj-def2-svp	b3lyp-d3bj-def2-tzvp	b3lyp-d4-def2-svp	b3lyp-d4-def2-tzvp	pbe0-d3bj-def2-svp	pbe0-d3bj-def2-tzvp	pbe0-d4-def2-svp	pbe0-d4-def2-tzvp	pbeh-3c	r2scan-3c
47	Chlorine trifluoride	ClF3	13748.3	0.00044			https://doi.org/10.1039/B100527H	12955	13400.4	12955.5	13400.8	13405.4	13887.2	13405.7	13887.5	13684.7	12810		0.942302	0.887933	0.00332904	0.00256133		0.974692	0.950025	0.000640491	0.000626472		0.942336	0.887998	0.0033251	0.00255072		0.974725	0.950088	0.000638847	0.00062162		0.975059	0.950741	0.000622036	0.000905524		1.0101	1.02031	0.000102049	5.44278e-06		0.975081
45			4611.75	0.000168				4409.86	4511.17	4410.23	4511.54	4534.06	4657.9	4534.26	4658.1	4675.05	4333.65		0.956221	0.914358	0.00191661	0.00133854		0.97819	0.956855	0.000475694	0.00046358		0.956302	0.914514	0.00190951	0.00132735		0.978269	0.95701	0.000472237	0.00045739		0.983153	0.96659	0.000283824	0.00048581		1.01001	1.02011	0.000100113	5.89572e-06		0.983196
			3448.6	0.000142				3289.96	3374.99	3290.2	3375.23	3388.11	3487.99	3388.24	3488.12	3484.62	3238.17		0.954	0.910115	0.00211605	0.00150732		0.978656	0.957767	0.000455568	0.000443709		0.954069	0.910247	0.00210969	0.00149639		0.978724	0.9579	0.000452685	0.000438144		0.98246	0.965227	0.000307658	0.000516678		1.01142	1.02297	0.000130466	1.05885e-06		0.982498
								b3lyp-d3bj-def2-svp	b3lyp-d3bj-def2-tzvp	b3lyp-d4-def2-svp	b3lyp-d4-def2-tzvp	pbe0-d3bj-def2-svp	pbe0-d3bj-def2-tzvp	pbe0-d4-def2-svp	pbe0-d4-def2-tzvp	pbeh-3c	r2scan-3c
48	Chlorodifluoroborane	BClF2	10449.3	0.13			https://doi.org/10.1016/0022-2852(77)90196-5	10378.1	10358.6	10378.1	10358.5	10422.8	10424	10422.8	10424	10442.4	10370.7		0.993187	0.98642	4.64189e-05	4.32855e-07		0.991314	0.982704	7.54382e-05	7.05978e-05		0.993183	0.986413	4.6468e-05	5.30842e-07		0.991312	0.982699	7.54863e-05	6.95447e-05		0.997466	0.994938	6.42217e-06	6.09e-05		0.99758	0.995167	5.85423e-06	0.0002161		0.99746
46			4705.81	0.02				4647.75	4656.37	4647.91	4656.52	4691.88	4700.66	4692.09	4700.88	4748.75	4668.47		0.987661	0.975474	0.000152249	2.41025e-05		0.989493	0.979097	0.000110394	0.000104533		0.987695	0.975541	0.000151416	2.30543e-05		0.989526	0.979162	0.000109701	0.000102526		0.997039	0.994087	8.76653e-06	6.77037e-05		0.998905	0.997812	1.19865e-06	0.000179343		0.997085
			3239.7	0.026				3210.12	3212.35	3210.2	3212.43	3235.44	3239.72	3235.53	3239.82	3264.3	3219.28		0.99087	0.981823	8.33595e-05	2.8107e-06		0.991559	0.983188	7.12579e-05	6.65546e-05		0.990892	0.981867	8.29528e-05	2.49612e-06		0.991581	0.983232	7.08872e-05	6.51316e-05		0.998683	0.997368	1.73452e-06	4.34688e-05		1.00001	1.00001	0	0.000151383		0.998713
								b3lyp-d3bj-def2-svp	b3lyp-d3bj-def2-tzvp	b3lyp-d4-def2-svp	b3lyp-d4-def2-tzvp	pbe0-d3bj-def2-svp	pbe0-d3bj-def2-tzvp	pbe0-d4-def2-svp	pbe0-d4-def2-tzvp	pbeh-3c	r2scan-3c
53	Selenoformaldehyde	H2CSe	294750	1740			https://doi.org/10.1080/00268978700101461	289380	294675	289435	294726	289164	293470	289186	293492	296120	292597		0.98178	0.963893	0.000331955	0.000117384		0.999745	0.999489	6.52739e-08	9.11294e-10		0.981968	0.964262	0.000325144	0.000111759		0.999917	0.999834	6.86295e-09	7.24306e-08		0.981049	0.962456	0.000359156	0.000582466		0.995656	0.991331	1.8871e-05	0.000275598		0.981123
47			12475.1	0.005				12378.4	12427	12376.5	12425.1	12537.6	12578.3	12537.2	12577.8	12719.8	12438.3		0.992251	0.984563	6.00394e-05	8.09334e-08		0.996147	0.99231	1.48428e-05	1.27306e-05		0.992095	0.984253	6.24856e-05	1.35213e-07		0.995992	0.992001	1.60614e-05	1.33742e-05		1.00502	1.01006	2.51565e-05	8.63839e-08		1.00827	1.01662	6.84752e-05	1.71185e-05		1.00498
			11943.5	0.005				11870.6	11924.1	11868.9	11922.4	12016.6	12061.3	12016.2	12060.9	12195.9	11931.1		0.993895	0.987827	3.72719e-05	1.8805e-06		0.998375	0.996753	2.63984e-06	1.7942e-06		0.993753	0.987544	3.90298e-05	1.69593e-06		0.998233	0.996469	3.12185e-06	2.00363e-06		1.00612	1.01227	3.74312e-05	6.44405e-07		1.00986	1.01982	9.72713e-05	6.60157e-06		1.00608
5-atomics								b3lyp-d3bj-def2-svp	b3lyp-d3bj-def2-tzvp	b3lyp-d4-def2-svp	b3lyp-d4-def2-tzvp	pbe0-d3bj-def2-svp	pbe0-d3bj-def2-tzvp	pbe0-d4-def2-svp	pbe0-d4-def2-tzvp	pbeh-3c	r2scan-3c
3	Methanimine	CH2NH	196211	0.00049			https://doi.org/10.1051/0004-6361/201423381	195140	198829	195159	198846	195418	198283	195424	198289	200714	196835		0.994545	0.989119	2.97602e-05	4.1046e-06		1.01334	1.02686	0.000177981	0.000185791		0.99464	0.989308	2.87321e-05	4.82313e-06		1.01343	1.02704	0.000180404	0.000190114		0.995957	0.99193	1.63485e-05	8.65832e-05		1.01056	1.02123	0.000111507	3.53772e-06		0.995992
48			34641.7	8.7e-05				34761.1	35059.4	34757.1	35055.4	34958.8	35227.9	34957.4	35226.5	35277.7	34900.9		1.00345	1.00691	1.1886e-05	0.000120909		1.01206	1.02426	0.000145376	0.000152434		1.00333	1.00667	1.10959e-05	0.000119979		1.01194	1.02403	0.000142601	0.000151235		1.00915	1.01839	8.37769e-05	1.46045e-05		1.01692	1.03413	0.000286347	1.93856e-05		1.00911
			29351.5	8.1e-05				29505.2	29804	29502.8	29801.5	29653.9	29913.3	29653	29912.5	30004.2	29644.6		1.00524	1.0105	2.74391e-05	0.000163839		1.01542	1.03107	0.000237719	0.000246751		1.00515	1.01033	2.656e-05	0.000163582		1.01533	1.0309	0.000235104	0.000246191		1.0103	1.02071	0.000106152	2.46568e-05		1.01914	1.03865	0.000366421	4.3506e-05		1.01027
								b3lyp-d3bj-def2-svp	b3lyp-d3bj-def2-tzvp	b3lyp-d4-def2-svp	b3lyp-d4-def2-tzvp	pbe0-d3bj-def2-svp	pbe0-d3bj-def2-tzvp	pbe0-d4-def2-svp	pbe0-d4-def2-tzvp	pbeh-3c	r2scan-3c
4	diazomethane	CH2NN	272979	8.1			https://doi.org/10.1016/0022-2852(83)90342-9	271618	277112	271670	277161	271629	276134	271653	276158	278999	274856		0.995015	0.990054	2.48546e-05	6.24685e-06		1.01514	1.03051	0.000229269	0.000238138		0.995204	0.990432	2.29983e-05	7.64544e-06		1.01532	1.03088	0.000234721	0.0002458		0.995053	0.990131	2.44705e-05	0.000104115		1.01156	1.02325	0.0001336	7.99789e-07		0.995143
49			11305.4	0.00045				11312.3	11428.7	11311	11427.3	11400.9	11504	11400.5	11503.5	11519.9	11385.3		1.00061	1.00122	3.74236e-07	6.62378e-05		1.0109	1.02193	0.000118881	0.000125263		1.00049	1.00098	2.38682e-07	6.54382e-05		1.01078	1.02167	0.000116188	0.000123985		1.00845	1.01696	7.13414e-05	9.72644e-06		1.01756	1.03543	0.000308402	2.53476e-05		1.00841
			10845.2	0.00047				10860	10976	10858.8	10974.8	10941.7	11043.9	10941.3	11043.5	11063.1	10932.5		1.00137	1.00274	1.86835e-06	7.92005e-05		1.01206	1.02427	0.000145455	0.000152515		1.00126	1.00251	1.57791e-06	7.85495e-05		1.01195	1.02404	0.000142759	0.000151398		1.00889	1.01787	7.90883e-05	1.2696e-05		1.01832	1.03697	0.000335505	3.3417e-05		1.00886
								b3lyp-d3bj-def2-svp	b3lyp-d3bj-def2-tzvp	b3lyp-d4-def2-svp	b3lyp-d4-def2-tzvp	pbe0-d3bj-def2-svp	pbe0-d3bj-def2-tzvp	pbe0-d4-def2-svp	pbe0-d4-def2-tzvp	pbeh-3c	r2scan-3c
6	hydroxylamine	NH2OH	192592		6.42418		https://pubs.acs.org/doi/pdf/10.1021/j100151a023	191354	192590	191353	192587	193582	194224	193580	194222	195890	191449		0.993574	0.98719	4.12879e-05	1.09916e-06		0.999989	0.999977	1.29688e-10	7.52717e-08		0.993566	0.987174	4.13944e-05	1.24187e-06		0.999976	0.999952	5.81925e-10	1.07499e-07		1.00514	1.0103	2.64046e-05	2.94607e-08		1.00847	1.01702	7.18095e-05	1.55301e-05		1.00513
50			25680.5		0.856608			25681.3	25380.6	25679.8	25379.2	26318.5	26030.2	26318.1	26029.9	26435.4	25115.6		1.00003	1.00006	1.01723e-09	5.70696e-05		0.988325	0.976786	0.000136306	0.000129791		0.999974	0.999949	6.52396e-10	5.73259e-05		0.988268	0.976673	0.000137649	0.000129608		1.02485	1.05031	0.000617353	0.000377614		1.01362	1.02742	0.000185486	1.30208e-06		1.02483
			25661.7		0.855983			25669.3	25331.1	25667.9	25329.7	26273.6	25960.4	26273.2	25960.1	26349.5	25113.8		1.0003	1.00059	8.82631e-08	6.1178e-05		0.987117	0.9744	0.00016597	0.000158782		1.00024	1.00048	5.75866e-08	6.14486e-05		0.987061	0.974289	0.000167419	0.000158549		1.02384	1.04825	0.000568499	0.00033982		1.01164	1.02341	0.000135452	6.64991e-07		1.02383
								b3lyp-d3bj-def2-svp	b3lyp-d3bj-def2-tzvp	b3lyp-d4-def2-svp	b3lyp-d4-def2-tzvp	pbe0-d3bj-def2-svp	pbe0-d3bj-def2-tzvp	pbe0-d4-def2-svp	pbe0-d4-def2-tzvp	pbeh-3c	r2scan-3c
7	Ketene	CH2CO	282081	12			https://doi.org/10.1016/0022-2852(72)90227-5	278742	285018	278782	285055	278568	283651	278587	283669	286323	283221		0.988163	0.976465	0.000140125	1.93968e-05		1.01041	1.02093	0.000108372	0.000114467		0.988303	0.976743	0.000136813	1.75433e-05		1.01054	1.0212	0.00011116	0.000118788		0.987546	0.975248	0.000155093	0.000312261		1.00557	1.01116	3.09875e-05	4.64094e-05		0.987614
51			10294	0.0059				10216.3	10337.8	10215.6	10337.1	10273.4	10381.5	10273.2	10381.2	10363	10311.7		0.992456	0.984969	5.69084e-05	6.11566e-09		1.00425	1.00853	1.81034e-05	2.06277e-05		0.992391	0.984839	5.79044e-05	4.92514e-09		1.00419	1.0084	1.75613e-05	2.06488e-05		0.998003	0.996011	3.9864e-06	5.28396e-05		1.0085	1.01707	7.22188e-05	1.5343e-05		0.997983
			9915.24	0.0062				9855.11	9975.94	9854.53	9975.37	9908.02	10014.9	9907.84	10014.7	10001	9949.46		0.993936	0.987908	3.67741e-05	1.99523e-06		1.00612	1.01228	3.74747e-05	4.10773e-05		0.993877	0.987792	3.7487e-05	2.03903e-06		1.00606	1.01217	3.6775e-05	4.11955e-05		0.999272	0.998544	5.3052e-07	3.60907e-05		1.01005	1.02021	0.000101053	5.67293e-06		0.999254
								b3lyp-d3bj-def2-svp	b3lyp-d3bj-def2-tzvp	b3lyp-d4-def2-svp	b3lyp-d4-def2-tzvp	pbe0-d3bj-def2-svp	pbe0-d3bj-def2-tzvp	pbe0-d4-def2-svp	pbe0-d4-def2-tzvp	pbeh-3c	r2scan-3c
8	Hydrogen trioxide	H2O3	51149				https://pubs.acs.org/doi/full/10.1021/ja0556530	52344.3	52169.9	52381.6	52205.7	53950.2	53635.9	53963.4	53648.6	54763.9	51906		1.02337	1.04728	0.000546095	0.000965144		1.01996	1.04032	0.000398359	0.000410078		1.0241	1.04878	0.000580686	0.00101618		1.02066	1.04174	0.000426783	0.000441756		1.05477	1.11253	0.00299936	0.00242005		1.04862	1.0996	0.0023639	0.00127527		1.05502
52			10688					10827.1	10684.4	10822	10679.6	11122.6	11026.3	11120.9	11024.6	11132	10500.8		1.01302	1.02621	0.000169472	0.000425942		0.999667	0.999333	1.11125e-07	2.27535e-09		1.01254	1.02523	0.000157194	0.000409256		0.999217	0.998434	6.13577e-07	1.86266e-07		1.04066	1.08298	0.00165353	0.00123663		1.03165	1.0643	0.0010016	0.000359024		1.0405
			9355					9534.19	9415.53	9531.91	9413.35	9811.42	9722.87	9810.69	9722.17	9840.4	9267.88		1.01915	1.03868	0.000366893	0.000719358		1.00647	1.01298	4.18626e-05	4.56669e-05		1.01891	1.03818	0.000357622	0.000710312		1.00624	1.01251	3.89096e-05	4.34538e-05		1.04879	1.09996	0.00238031	0.00187036		1.03932	1.08019	0.00154635	0.000703787		1.04871
								b3lyp-d3bj-def2-svp	b3lyp-d3bj-def2-tzvp	b3lyp-d4-def2-svp	b3lyp-d4-def2-tzvp	pbe0-d3bj-def2-svp	pbe0-d3bj-def2-tzvp	pbe0-d4-def2-svp	pbe0-d4-def2-tzvp	pbeh-3c	r2scan-3c
9	Formic acid	HCOOH	76800				https://doi.org/10.1063/1.1743367	77542.9	78117.3	77539	78113.7	77982.7	78463.9	77980.1	78461.3	79392.2	77505.9		1.00967	1.01944	9.35601e-05	0.000298174		1.01715	1.0346	0.000294218	0.000304274		1.00962	1.01934	9.25868e-05	0.000299028		1.01711	1.0345	0.000292586	0.000304962		1.0154	1.03104	0.000237155	0.00010071		1.02167	1.0438	0.000469391	8.25945e-05		1.01537
53			12055.1					12086.9	12058.7	12086.4	12058.1	12212	12185.3	12212	12185.3	12173.8	11984.3		1.00264	1.00528	6.96372e-06	0.000103654		1.0003	1.0006	8.90096e-08	3.41264e-07		1.00259	1.0052	6.73229e-06	0.000104275		1.00025	1.0005	6.35199e-08	3.64963e-07		1.01302	1.02621	0.000169487	5.87813e-05		1.0108	1.02172	0.000116692	2.6934e-06		1.01302
			10416					10456.9	10446.2	10456.5	10445.7	10558.6	10547.3	10558.5	10547.3	10555.3	10379.4		1.00393	1.00788	1.54536e-05	0.000131859		1.0029	1.0058	8.3841e-06	1.01258e-05		1.00389	1.00779	1.51013e-05	0.000132542		1.00285	1.00571	8.11693e-06	1.0253e-05		1.01369	1.02756	0.000187365	6.94354e-05		1.01261	1.02538	0.000158994	2.05935e-08		1.01368
								b3lyp-d3bj-def2-svp	b3lyp-d3bj-def2-tzvp	b3lyp-d4-def2-svp	b3lyp-d4-def2-tzvp	pbe0-d3bj-def2-svp	pbe0-d3bj-def2-tzvp	pbe0-d4-def2-svp	pbe0-d4-def2-tzvp	pbeh-3c	r2scan-3c
10	Nitric acid	HNO3	13011	0.0009			https://doi.org/10.1016/0022-4073(88)90029-5	13094	13084.5	13094	13084.6	13303.2	13275.1	13303.3	13275.2	13347.9	12999		1.00638	1.0128	4.06693e-05	0.000194533		1.00565	1.01133	3.19034e-05	3.52322e-05		1.00638	1.0128	4.07023e-05	0.000196713		1.00565	1.01134	3.19717e-05	3.61002e-05		1.02246	1.04542	0.000504246	0.000290831		1.0203	1.041	0.000411899	5.98285e-05		1.02246
54			12099.9	0.0009				12182.2	12095.5	12181.5	12094.7	12475.1	12413.7	12475	12413.6	12676.3	11894.3		1.00681	1.01366	4.63239e-05	0.000206775		0.999638	0.999277	1.30734e-07	5.76483e-09		1.00674	1.01353	4.54896e-05	0.000207157		0.999572	0.999144	1.83365e-07	5.83097e-09		1.03101	1.06299	0.000961781	0.000653606		1.02594	1.05255	0.000672871	0.000177153		1.031
			6260.65	0.00083				6310.84	6285.29	6310.64	6285.09	6437.93	6414.99	6437.92	6414.97	6501.72	6211.07		1.00802	1.0161	6.42674e-05	0.000243338		1.00394	1.00789	1.54989e-05	1.78399e-05		1.00799	1.01604	6.37764e-05	0.000244729		1.0039	1.00783	1.52488e-05	1.81336e-05		1.02832	1.05744	0.000801867	0.000523706		1.02465	1.04991	0.000607761	0.000144932		1.02832
								b3lyp-d3bj-def2-svp	b3lyp-d3bj-def2-tzvp	b3lyp-d4-def2-svp	b3lyp-d4-def2-tzvp	pbe0-d3bj-def2-svp	pbe0-d3bj-def2-tzvp	pbe0-d4-def2-svp	pbe0-d4-def2-tzvp	pbeh-3c	r2scan-3c
13	Methane, difluoro-	CH2F2	49142.8	0.085			https://doi.org/10.1016/0022-2852(76)90140-5	49807.4	49265.3	49798.8	49257.3	50229.3	49770	50225.7	49766.3	49816	48881.5		1.01352	1.02723	0.000182895	0.000447235		1.00249	1.00499	6.22106e-06	7.73211e-06		1.01335	1.02688	0.000178187	0.000442985		1.00233	1.00467	5.43233e-06	7.20148e-06		1.02211	1.04471	0.000488878	0.000279248		1.01276	1.02569	0.000162883	8.69637e-08		1.02204
55			10604.7	0.02				10555.3	10504.9	10556	10505.5	10690.5	10660.7	10690.8	10661.1	10654.1	10435.3		0.995345	0.990712	2.16676e-05	8.02274e-06		0.990588	0.981265	8.85799e-05	8.33319e-05		0.995407	0.990834	2.10996e-05	8.81375e-06		0.99065	0.981388	8.74172e-05	8.10181e-05		1.00809	1.01624	6.54005e-05	7.62475e-06		1.00528	1.01059	2.78963e-05	5.03233e-05		1.00812
			9249.84	0.016				9247.35	9186.89	9247.56	9187.11	9364.07	9322.97	9364.2	9323.11	9310.9	9126.57		0.999731	0.999462	7.23947e-08	5.25802e-05		0.993195	0.986436	4.63074e-05	4.25254e-05		0.999753	0.999507	6.07825e-08	5.40035e-05		0.993219	0.986483	4.59869e-05	4.13674e-05		1.01235	1.02485	0.000152529	4.90279e-05		1.00791	1.01588	6.25117e-05	2.02631e-05		1.01236
								b3lyp-d3bj-def2-svp	b3lyp-d3bj-def2-tzvp	b3lyp-d4-def2-svp	b3lyp-d4-def2-tzvp	pbe0-d3bj-def2-svp	pbe0-d3bj-def2-tzvp	pbe0-d4-def2-svp	pbe0-d4-def2-tzvp	pbeh-3c	r2scan-3c
19	difluorosilane	SiH2F2	24690.7				https://doi.org/10.1063/1.1743546	23690.9	24416.1	23679	24404.1	23759.6	24517.5	23754.3	24512.1	24177	24278.7		0.959507	0.920653	0.00163971	0.00110727		0.98888	0.977884	0.000123655	0.000117451		0.959026	0.919731	0.00167884	0.00113487		0.988394	0.976923	0.000134692	0.000126737		0.962288	0.925998	0.00142221	0.0018315		0.992984	0.986018	4.92183e-05	0.000370169		0.962074
56			7801.9					7461.22	7648.49	7462.75	7650.15	7496.26	7706.71	7497.02	7707.53	7502.01	7611.78		0.956334	0.914575	0.00190672	0.00133022		0.980337	0.961061	0.000386619	0.000375681		0.95653	0.914949	0.00188966	0.00131068		0.98055	0.961478	0.000378303	0.000364996		0.960825	0.923186	0.00153464	0.00195811		0.987799	0.975748	0.000148854	0.000593455		0.960922
			6377.09					6101.58	6270.02	6102.03	6270.55	6130.91	6318.23	6131.17	6318.52	6152.08	6238.48		0.956796	0.915459	0.00186657	0.00129647		0.98321	0.966701	0.000281917	0.000272562		0.956868	0.915596	0.00186038	0.00128613		0.983293	0.966866	0.000279109	0.000267664		0.961397	0.924284	0.00149022	0.00190815		0.990769	0.981624	8.52024e-05	0.000459135		0.961436
								b3lyp-d3bj-def2-svp	b3lyp-d3bj-def2-tzvp	b3lyp-d4-def2-svp	b3lyp-d4-def2-tzvp	pbe0-d3bj-def2-svp	pbe0-d3bj-def2-tzvp	pbe0-d4-def2-svp	pbe0-d4-def2-tzvp	pbeh-3c	r2scan-3c
25	Thioketene	CH2CS	286655	82			https://doi.org/10.1515/zna-1980-0503	282843	289232	282907	289295	282651	288005	282793	288036	289600	287133		0.986703	0.973583	0.000176809	3.45116e-05		1.00899	1.01806	8.08171e-05	8.60841e-05		0.986926	0.974023	0.000170925	3.10919e-05		1.00921	1.0185	8.47997e-05	9.14685e-05		0.986033	0.972262	0.000195066	0.000367713		1.00471	1.00944	2.21869e-05	5.86489e-05		0.986526
57			5659.48	0.00072				5614.36	5686.96	5613.23	5685.89	5646.43	5712.97	5645.54	5712.65	5714.21	5652.34		0.992027	0.984118	6.35629e-05	2.60401e-07		1.00486	1.00974	2.35899e-05	2.64615e-05		0.991829	0.983724	6.67713e-05	4.04909e-07		1.00467	1.00936	2.17814e-05	2.52074e-05		0.997695	0.995396	5.31166e-06	5.73892e-05		1.00945	1.01899	8.93507e-05	8.84692e-06		0.997537
			5544.51	0.00072				5505.08	5577.3	5504.02	5576.29	5535.84	5601.85	5535.04	5601.56	5603.64	5543.22		0.992888	0.985827	5.05786e-05	1.2741e-07		1.00591	1.01186	3.49716e-05	3.84539e-05		0.992697	0.985448	5.33271e-05	5.71724e-08		1.00573	1.0115	3.28497e-05	3.70331e-05		0.998437	0.996876	2.44398e-06	4.67596e-05		1.01034	1.02079	0.00010695	4.39412e-06		0.998292
								b3lyp-d3bj-def2-svp	b3lyp-d3bj-def2-tzvp	b3lyp-d4-def2-svp	b3lyp-d4-def2-tzvp	pbe0-d3bj-def2-svp	pbe0-d3bj-def2-tzvp	pbe0-d4-def2-svp	pbe0-d4-def2-tzvp	pbeh-3c	r2scan-3c
27	Sulfuryl fluoride	SO2F2	5135.06	0.017			https://doi.org/10.1016/j.jms.2004.05.004	4862.19	5052.21	4862.41	5052.44	4937.29	5123.16	4937.42	5123.29	4984.23	4822.02		0.946862	0.896548	0.0028236	0.00211738		0.983867	0.967993	0.00026029	0.000251297		0.946905	0.89663	0.00281903	0.00210688		0.98391	0.968079	0.000258883	0.000247858		0.961487	0.924458	0.00148323	0.00190029		0.997683	0.995371	5.37041e-06	0.000213144		0.961513
58			5070.04	0.00044				4783.42	4967.25	4783.67	4967.5	4868.21	5050.18	4868.36	5050.32	4893.03	4768.96		0.943468	0.890133	0.00319582	0.00244377		0.979726	0.959863	0.000411043	0.000399769		0.943518	0.890226	0.00319026	0.00243191		0.979775	0.959959	0.000409047	0.000395216		0.960192	0.921969	0.00158466	0.00201426		0.996082	0.99218	1.53474e-05	0.000261789		0.960222
			5054.06	0.00043				4769.87	4961.63	4770.13	4961.89	4839.62	5022.6	4839.77	5022.74	4863.01	4764.81		0.943768	0.890699	0.00316198	0.00241397		0.981712	0.963758	0.000334469	0.000324287		0.94382	0.890796	0.00315617	0.00240193		0.981763	0.963859	0.000332584	0.000320099		0.95757	0.91694	0.00180031	0.0022552		0.993774	0.987586	3.87685e-05	0.000340784		0.957599
								b3lyp-d3bj-def2-svp	b3lyp-d3bj-def2-tzvp	b3lyp-d4-def2-svp	b3lyp-d4-def2-tzvp	pbe0-d3bj-def2-svp	pbe0-d3bj-def2-tzvp	pbe0-d4-def2-svp	pbe0-d4-def2-tzvp	pbeh-3c	r2scan-3c
30	Methylene chloride	CH2Cl2	32002.3	0.0119917	1.06748	4e-07	https://doi.org/10.1006/jmsp.1996.0041	32332.6	32299.4	32322.8	32289.7	32742.8	32755.9	32734.3	32747.4	32166.5	31622.4		1.01032	1.02075	0.000106515	0.000321146		1.00928	1.01866	8.62101e-05	9.16488e-05		1.01002	1.02013	0.000100324	0.000312916		1.00898	1.01804	8.06638e-05	8.71696e-05		1.02314	1.04682	0.000535484	0.000314539		1.02355	1.04765	0.000554533	0.00011986		1.02287
59			3320.28	0.00125913	0.110753	4.2e-08		3209.58	3243.81	3209.18	3243.47	3277.21	3313.3	3277.68	3313.81	3325.19	3214.53		0.966658	0.934428	0.00111169	0.000679668		0.976967	0.954464	0.000530521	0.000517739		0.96654	0.934199	0.00111959	0.00068212		0.976864	0.954264	0.000535254	0.000519461		0.987029	0.974226	0.000168256	0.000330726		0.997898	0.995801	4.41658e-06	0.000206964		0.98717
			3065.23	0.0479668	0.102245	1.6e-06		2976.27	3004.71	2975.84	3004.33	3037.71	3068.2	3038.03	3068.55	3072.26	2974.49		0.970978	0.942799	0.000842257	0.000471657		0.980257	0.960904	0.000389784	0.000378803		0.970839	0.942528	0.000850386	0.000474621		0.980132	0.960658	0.000394744	0.000381153		0.991021	0.982122	8.06288e-05	0.000202065		1.00097	1.00194	9.39704e-07	0.000128893		0.991127
								b3lyp-d3bj-def2-svp	b3lyp-d3bj-def2-tzvp	b3lyp-d4-def2-svp	b3lyp-d4-def2-tzvp	pbe0-d3bj-def2-svp	pbe0-d3bj-def2-tzvp	pbe0-d4-def2-svp	pbe0-d4-def2-tzvp	pbeh-3c	r2scan-3c
31	fluorochloromethane	CH2FCl	41811.2	0	1.39467		https://doi.org/10.1006/jmsp.1996.0122	42460	42011.6	42444.8	41997.1	42867.7	42527.6	42861	42521.1	42087.7	41675.9		1.01552	1.03128	0.000240805	0.000536243		1.00479	1.00961	2.29618e-05	2.57959e-05		1.01515	1.03054	0.000229633	0.00052285		1.00444	1.00891	1.9757e-05	2.30252e-05		1.02527	1.05117	0.000638446	0.000394061		1.01713	1.03456	0.000293528	2.12632e-05		1.02511
60			5715.98	0	0.190665			5584.28	5619.76	5584.59	5620.09	5686.64	5723.02	5687.04	5723.43	5742.63	5538.67		0.97696	0.954451	0.000530842	0.000246208		0.983166	0.966616	0.000283377	0.000273997		0.977014	0.954557	0.000528335	0.000242208		0.983224	0.966729	0.000281435	0.000269942		0.994867	0.989761	2.63445e-05	0.000107923		1.00123	1.00247	1.51793e-06	0.00012307		0.994936
			5194.89	0	0.173283			5101.28	5122.79	5101.31	5122.84	5191.96	5215.93	5192.18	5216.17	5222.69	5052.69		0.98198	0.964284	0.000324726	0.000113069		0.98612	0.972433	0.000192652	0.000184909		0.981986	0.964296	0.000324511	0.000111385		0.986129	0.972451	0.000192391	0.000182882		0.999435	0.998871	3.19004e-07	3.41624e-05		1.00405	1.00812	1.64034e-05	6.90613e-05		0.999478
								b3lyp-d3bj-def2-svp	b3lyp-d3bj-def2-tzvp	b3lyp-d4-def2-svp	b3lyp-d4-def2-tzvp	pbe0-d3bj-def2-svp	pbe0-d3bj-def2-tzvp	pbe0-d4-def2-svp	pbe0-d4-def2-tzvp	pbeh-3c	r2scan-3c
32	dichlorosilane	SiH2Cl2	14135	0.008			https://doi.org/10.1016/0022-2852(76)90120-X	13838.2	14071	13832.2	14065.2	13915.5	14201.6	13910	14196.2	14019.5	13930.9		0.979003	0.958446	0.000440888	0.000185858		0.995474	0.990969	2.04824e-05	1.79886e-05		0.978575	0.95761	0.000459014	0.000195727		0.995063	0.99015	2.43743e-05	2.10384e-05		0.984467	0.969176	0.000241265	0.000429886		1.00471	1.00944	2.21693e-05	5.8677e-05		0.984082
61			2573.57	0.002				2476.45	2506.29	2475.39	2505.22	2508.41	2536.1	2508.61	2536.32	2526.07	2499.79		0.962261	0.925947	0.00142421	0.000930267		0.973856	0.948395	0.000683514	0.000669041		0.96185	0.925156	0.0014554	0.000951254		0.97344	0.947585	0.000705434	0.00068735		0.97468	0.950002	0.000641082	0.000928352		0.985442	0.971096	0.000211937	0.000712324		0.974759
			2232.61	0.002				2155.21	2182.95	2154.28	2182	2181.52	2209.06	2181.54	2209.09	2196.55	2175.06		0.965332	0.931866	0.00120188	0.000751121		0.977754	0.956003	0.000494887	0.000482535		0.964913	0.931057	0.00123109	0.000770414		0.977332	0.955178	0.000513841	0.000498363		0.977115	0.954754	0.000523725	0.000786644		0.989448	0.979008	0.000111336	0.000516756		0.977126
								b3lyp-d3bj-def2-svp	b3lyp-d3bj-def2-tzvp	b3lyp-d4-def2-svp	b3lyp-d4-def2-tzvp	pbe0-d3bj-def2-svp	pbe0-d3bj-def2-tzvp	pbe0-d4-def2-svp	pbe0-d4-def2-tzvp	pbeh-3c	r2scan-3c
33	difluorochloromethane	CHF2Cl	10234.7	0.0037			https://doi.org/10.1016/0022-2860(88)80298-9	10239	10184.2	10238.8	10184	10355.4	10316.7	10355.3	10316.6	10317	10122.5		1.00042	1.00084	1.7769e-07	6.3155e-05		0.995063	0.990151	2.43715e-05	2.16449e-05		1.0004	1.00081	1.62796e-07	6.40587e-05		0.995047	0.990118	2.45352e-05	2.11881e-05		1.01179	1.02372	0.000138967	4.15138e-05		1.00801	1.01609	6.41867e-05	1.93383e-05		1.01178
62			4861.24	0.0016				4759.61	4766.78	4759.43	4766.6	4840.96	4847.76	4841.09	4847.9	4883.78	4700.78		0.979094	0.958625	0.000437067	0.000183361		0.980568	0.961513	0.000377621	0.00036681		0.979057	0.958552	0.000438625	0.000182395		0.98053	0.96144	0.000379063	0.000365742		0.995828	0.991673	1.74071e-05	8.89847e-05		0.997227	0.994461	7.69011e-06	0.000226488		0.995854
			3507.45	0.0013				3455.64	3454.16	3455.61	3454.14	3510	3509.7	3510.1	3509.8	3531.5	3415.89		0.985227	0.970673	0.000218229	5.41899e-05		0.984807	0.969844	0.000230833	0.000222361		0.98522	0.970658	0.000218451	5.32209e-05		0.9848	0.96983	0.000231048	0.00022063		1.00073	1.00146	5.29641e-07	2.07855e-05		1.00064	1.00128	4.0978e-07	0.000136383		1.00076
								b3lyp-d3bj-def2-svp	b3lyp-d3bj-def2-tzvp	b3lyp-d4-def2-svp	b3lyp-d4-def2-tzvp	pbe0-d3bj-def2-svp	pbe0-d3bj-def2-tzvp	pbe0-d4-def2-svp	pbe0-d4-def2-tzvp	pbeh-3c	r2scan-3c
34	fluorodichloromethane	CHFCl2	6988.77	0.00299792	0.23312	1e-07	https://doi.org/10.1063/1.461556	6919.57	6927.11	6920.2	6927.73	7013.1	7020.07	7013.07	7020.04	7031.18	6849.81		0.990099	0.980296	9.80298e-05	6.01803e-06		0.991177	0.982432	7.78466e-05	7.2929e-05		0.990189	0.980474	9.62611e-05	5.2381e-06		0.991266	0.982609	7.62787e-05	7.03055e-05		1.00348	1.00697	1.21173e-05	3.314e-06		1.00448	1.00898	2.00536e-05	6.22137e-05		1.00348
63			3307.22	0.00299792	0.110317	1e-07		3218.55	3238.25	3217.64	3237.38	3283.51	3305.36	3283.67	3305.54	3321.82	3203.29		0.973189	0.947097	0.000718833	0.000379877		0.979147	0.958729	0.000434853	0.000423262		0.972913	0.946561	0.00073368	0.0003879		0.978883	0.958211	0.000445945	0.000431511		0.992831	0.985714	5.13913e-05	0.000154106		0.999438	0.998876	3.15886e-07	0.000165526		0.99288
			2349.97	0.00599585	0.0783864	2e-07		2297.36	2308.69	2297.02	2308.37	2339.95	2351.99	2340.06	2352.11	2363.65	2284.63		0.977613	0.955728	0.000501167	0.000225987		0.982437	0.965183	0.000308451	0.000298669		0.977469	0.955445	0.00050766	0.000228172		0.982301	0.964915	0.000313255	0.000301135		0.995738	0.991493	1.81686e-05	9.06872e-05		1.00086	1.00172	7.39228e-07	0.000131363		0.995784
								b3lyp-d3bj-def2-svp	b3lyp-d3bj-def2-tzvp	b3lyp-d4-def2-svp	b3lyp-d4-def2-tzvp	pbe0-d3bj-def2-svp	pbe0-d3bj-def2-tzvp	pbe0-d4-def2-svp	pbe0-d4-def2-tzvp	pbeh-3c	r2scan-3c
39	Sulfuryl chloride	SO2Cl2	3485.92				https://doi.org/10.1515/zna-1992-1112	3258.87	3416.56	3259.97	3417.61	3343.46	3490	3343.82	3490.34	3404.62	3271.72		0.934867	0.873976	0.00424231	0.00337568		0.980103	0.960601	0.000395908	0.000384841		0.935182	0.874566	0.00420132	0.00333077		0.980405	0.961193	0.00038398	0.000370574		0.959132	0.919934	0.00167022	0.00211007		1.00117	1.00234	1.36727e-06	0.000124449		0.959236
64			2344.31					2196.76	2262.59	2195.21	2261.21	2261.69	2323.19	2261.59	2323.12	2289.7	2194.73		0.93706	0.878082	0.00396141	0.00312379		0.965141	0.931498	0.00121513	0.00119598		0.9364	0.876845	0.00404496	0.00319067		0.964554	0.930364	0.00125642	0.00123247		0.964756	0.930755	0.00124211	0.00162735		0.990992	0.982065	8.11483e-05	0.000449775		0.964716
			1930.37					1796.83	1864.17	1796.14	1863.56	1858.32	1920.53	1858.37	1920.59	1892.69	1802.67		0.930822	0.86643	0.0047856	0.00386586		0.965705	0.932587	0.00117611	0.00115726		0.930462	0.86576	0.00483549	0.00390236		0.96539	0.931978	0.00119786	0.00117445		0.962674	0.926742	0.0013932	0.00179873		0.994903	0.989831	2.5983e-05	0.000300855		0.962701
								b3lyp-d3bj-def2-svp	b3lyp-d3bj-def2-tzvp	b3lyp-d4-def2-svp	b3lyp-d4-def2-tzvp	pbe0-d3bj-def2-svp	pbe0-d3bj-def2-tzvp	pbe0-d4-def2-svp	pbe0-d4-def2-tzvp	pbeh-3c	r2scan-3c
40	Chlorine nitrate	ClONO2	12105.8	2.3e-05			https://doi.org/10.1016/j.jms.2007.02.023	12208	12167.5	12207.8	12167.4	12493	12458.9	12493.3	12459.3	12665.5	11922.5		1.00844	1.01695	7.12424e-05	0.000256843		1.0051	1.01022	2.59782e-05	2.89883e-05		1.00843	1.01693	7.106e-05	0.000258916		1.00509	1.0102	2.5895e-05	2.96208e-05		1.03199	1.065	0.00102323	0.000704158		1.02917	1.0592	0.000851056	0.000272355		1.03201
65			2777	3.9e-05				2715.99	2731.15	2715.71	2730.88	2790.45	2821.39	2790.63	2821.59	2854.24	2668.5		0.978029	0.956541	0.000482726	0.000213569		0.983491	0.967254	0.000272555	0.000263355		0.977929	0.956346	0.00048711	0.000214362		0.983391	0.967057	0.000275873	0.000264494		1.00484	1.00971	2.34717e-05	2.15174e-07		1.01599	1.03223	0.000255551	1.21007e-05		1.00491
			2258.15	3.7e-05				2221.71	2230.49	2221.52	2230.3	2280.97	2300.45	2281.1	2300.59	2329.32	2180.47		0.983862	0.967984	0.000260441	7.63397e-05		0.987751	0.975652	0.000150038	0.000143204		0.983778	0.967819	0.000263153	7.65295e-05		0.987667	0.975487	0.000152094	0.00014364		1.01011	1.02032	0.000102148	2.27568e-05		1.01873	1.03781	0.000350802	3.82983e-05		1.01016
								b3lyp-d3bj-def2-svp	b3lyp-d3bj-def2-tzvp	b3lyp-d4-def2-svp	b3lyp-d4-def2-tzvp	pbe0-d3bj-def2-svp	pbe0-d3bj-def2-tzvp	pbe0-d4-def2-svp	pbe0-d4-def2-tzvp	pbeh-3c	r2scan-3c
43	difluorodichloromethane	CF2Cl2	4118.82	0.00085			https://doi.org/10.1016/0022-2852(83)90014-0	4080.44	4078.44	4080.8	4078.81	4133.55	4132.3	4133.57	4132.32	4154.31	4035.37		0.990681	0.981449	8.68451e-05	3.48519e-06		0.990196	0.980488	9.61219e-05	9.06538e-05		0.99077	0.981624	8.52021e-05	2.90191e-06		0.990285	0.980664	9.43828e-05	8.77313e-05		1.00358	1.00716	1.27853e-05	2.98003e-06		1.00327	1.00655	1.07042e-05	8.24303e-05		1.00358
66			2638.67	0.00079				2590.05	2592.76	2589.33	2592.05	2635.86	2641.36	2635.88	2641.39	2660.81	2570.96		0.981573	0.963486	0.000339546	0.00012195		0.982602	0.965506	0.000302698	0.000293007		0.981301	0.962951	0.000349659	0.00012643		0.98233	0.964972	0.000312237	0.000300137		0.998936	0.997873	1.13276e-06	4.02175e-05		1.00102	1.00204	1.03832e-06	0.000127783		0.998942
			2233.69	0.0008				2188.17	2193.47	2187.78	2193.08	2226.88	2233.37	2226.91	2233.41	2252.85	2170.26		0.979622	0.95966	0.000415248	0.000169224		0.981993	0.96431	0.000324263	0.000314236		0.979448	0.959317	0.000422405	0.000171912		0.981819	0.963968	0.000330567	0.000318119		0.996952	0.993914	9.2885e-06	6.91332e-05		0.999859	0.999718	1.9882e-08	0.000154998		0.996963
								b3lyp-d3bj-def2-svp	b3lyp-d3bj-def2-tzvp	b3lyp-d4-def2-svp	b3lyp-d4-def2-tzvp	pbe0-d3bj-def2-svp	pbe0-d3bj-def2-tzvp	pbe0-d4-def2-svp	pbe0-d4-def2-tzvp	pbeh-3c	r2scan-3c
55	dibromomethane	CH2Br2	26035.2	0.4			https://doi.org/10.1039/TF9716701539	26448.9	26378.2	26435.7	26365.1	26820.1	26749.5	26807.5	26735.9	25701.6	26194.6		1.01589	1.03203	0.000252508	0.000553772		1.01318	1.02652	0.000173587	0.000181299		1.01538	1.031	0.000236658	0.000533504		1.01267	1.02551	0.0001606	0.000169761		1.03015	1.0612	0.000908877	0.000610351		1.02744	1.05563	0.000752775	0.000218698		1.02966
67			1238.7	0.22				1195.69	1200.35	1195.53	1200.19	1223.82	1229.92	1224.13	1230.29	1239.77	1194.76		0.965276	0.931757	0.00120577	0.000754224		0.969036	0.939032	0.00095874	0.000941669		0.965146	0.931506	0.00121483	0.000757462		0.968911	0.938788	0.000966528	0.000945438		0.987985	0.976114	0.000144369	0.000297043		0.992913	0.985875	5.02316e-05	0.000372904		0.988235
			1191.13	0.002				1152.59	1156.67	1152.41	1156.5	1179.39	1184.83	1179.65	1185.15	1191.67	1151.24		0.967641	0.93633	0.00104708	0.000628991		0.971072	0.94298	0.000836845	0.000820868		0.967493	0.936042	0.00105672	0.000632878		0.970928	0.9427	0.000845202	0.000825447		0.990145	0.980388	9.71113e-05	0.000227572		0.994714	0.989455	2.79465e-05	0.000307368		0.990366
								b3lyp-d3bj-def2-svp	b3lyp-d3bj-def2-tzvp	b3lyp-d4-def2-svp	b3lyp-d4-def2-tzvp	pbe0-d3bj-def2-svp	pbe0-d3bj-def2-tzvp	pbe0-d4-def2-svp	pbe0-d4-def2-tzvp	pbeh-3c	r2scan-3c
56	Methane, bromochloro-	CH2BrCl	29198.3	0.042			https://doi.org/10.1016/0022-2852(89)90215-4	29558.8	29564.1	29547.3	29552.8	29955.8	29981.4	29944.7	29970.6	29120.3	29096.1		1.01235	1.02484	0.000152408	0.000398424		1.01253	1.02521	0.000156922	0.000164255		1.01195	1.02405	0.000142851	0.000385728		1.01214	1.02443	0.000147386	0.000156164		1.02594	1.05256	0.00067305	0.000421198		1.02682	1.05435	0.000719172	0.000200978		1.02556
68			2133.14	0.014				2060.33	2073.64	2060.02	2073.36	2106.57	2121.14	2107	2121.58	2132.56	2062.76		0.965866	0.932896	0.00116516	0.000721941		0.972107	0.944991	0.000778047	0.000762628		0.965724	0.932622	0.00117487	0.000725742		0.971973	0.944732	0.000785489	0.000766428		0.987546	0.975248	0.000155096	0.000312264		0.994372	0.988776	3.167e-05	0.000319297		0.987747
			2012.9	3				1950.58	1962.23	1950.25	1961.92	1993.65	2006.56	1993.98	2006.9	2012.42	1950.73		0.969038	0.939035	0.000958633	0.000560383		0.974827	0.950288	0.000633681	0.000619734		0.968876	0.938721	0.000968695	0.000564689		0.974674	0.949989	0.000641429	0.000624168		0.990438	0.980967	9.14356e-05	0.000218884		0.996848	0.993707	9.93267e-06	0.00023788		0.990602
								b3lyp-d3bj-def2-svp	b3lyp-d3bj-def2-tzvp	b3lyp-d4-def2-svp	b3lyp-d4-def2-tzvp	pbe0-d3bj-def2-svp	pbe0-d3bj-def2-tzvp	pbe0-d4-def2-svp	pbe0-d4-def2-tzvp	pbeh-3c	r2scan-3c
57	Methane, bromofluoro-	CH2BrF	39853	0.00062			https://pubs.acs.org/doi/full/10.1021/jp0722051	40574.7	40165	40553.7	40145	40993.3	40692.1	40983.9	40683	40164.2	39854.1		1.01811	1.03655	0.000327971	0.000664016		1.00783	1.01572	6.1303e-05	6.58956e-05		1.01758	1.03547	0.000309139	0.000640751		1.00733	1.01471	5.3701e-05	5.90236e-05		1.02861	1.05804	0.000818684	0.000537241		1.02105	1.04255	0.0004433	7.1994e-05		1.02838
69			3772.96	6.9e-05				3673.04	3684.43	3673.36	3684.76	3748.3	3757.54	3748.73	3757.97	3745.55	3663.3		0.973516	0.947734	0.000701385	0.000367128		0.976538	0.953626	0.000550486	0.00053747		0.973603	0.947903	0.000696796	0.000361012		0.976625	0.953796	0.000546389	0.000530436		0.993464	0.98697	4.27252e-05	0.000138885		0.995914	0.991844	1.66987e-05	0.000267213		0.993578
			3523.95	7.1e-05				3445.02	3451.35	3445.15	3451.48	3513.9	3519.22	3514.2	3519.53	3503.47	3431.48		0.977601	0.955704	0.000501702	0.000226349		0.979397	0.959219	0.000424476	0.000413023		0.977637	0.955775	0.000500084	0.000223064		0.979435	0.959293	0.000422926	0.000408865		0.997146	0.994301	8.14274e-06	6.59589e-05		0.998657	0.997316	1.80358e-06	0.000185968		0.997233
								b3lyp-d3bj-def2-svp	b3lyp-d3bj-def2-tzvp	b3lyp-d4-def2-svp	b3lyp-d4-def2-tzvp	pbe0-d3bj-def2-svp	pbe0-d3bj-def2-tzvp	pbe0-d4-def2-svp	pbe0-d4-def2-tzvp	pbeh-3c	r2scan-3c
60	fluorochlorobromomethane	CHFClBr	6444.96	0.33			https://doi.org/10.1016/S0022-2860(01)00851-1	6410.08	6426.22	6410.7	6426.85	6498.96	6512.51	6498.79	6512.33	6507.23	6355.49		0.994589	0.989207	2.92818e-05	4.2863e-06		0.997093	0.994194	8.45191e-06	6.87645e-06		0.994684	0.989396	2.82634e-05	5.0194e-06		0.99719	0.994388	7.89467e-06	6.04537e-06		1.00838	1.01683	7.02003e-05	9.31019e-06		1.01048	1.02107	0.000109867	3.83314e-06		1.00835
70			2038.28	0.036				1977.23	1982.97	1976.65	1982.41	2020.74	2027.47	2020.96	2027.71	2038.56	1972.45		0.970046	0.940989	0.000897239	0.000513338		0.972864	0.946464	0.000736385	0.000721375		0.969763	0.94044	0.000914298	0.000523035		0.972588	0.945927	0.000751422	0.00073277		0.991393	0.98286	7.40821e-05	0.000191675		0.994697	0.989422	2.81201e-05	0.000307937		0.9915
			1599.46	0.0079				1559.56	1564.29	1559.27	1564.01	1591.52	1596.55	1591.66	1596.7	1604.71	1554.46		0.975057	0.950736	0.000622168	0.000310063		0.97801	0.956504	0.000483548	0.000471336		0.974874	0.95038	0.000631297	0.000313976		0.977834	0.95616	0.000491312	0.000476172		0.995034	0.990093	2.4657e-05	0.000104497		0.998181	0.996365	3.30915e-06	0.000199015		0.995124
								b3lyp-d3bj-def2-svp	b3lyp-d3bj-def2-tzvp	b3lyp-d4-def2-svp	b3lyp-d4-def2-tzvp	pbe0-d3bj-def2-svp	pbe0-d3bj-def2-tzvp	pbe0-d4-def2-svp	pbe0-d4-def2-tzvp	pbeh-3c	r2scan-3c
61	Methane, bromodifluoro-	CHBrF2	10199.7	3.5e-05			https://pubs.acs.org/doi/full/10.1021/jp110510v	10208.5	10163.5	10207.9	10162.9	10323.3	10294.9	10323	10294.6	10291	10097.8		1.00087	1.00173	7.48278e-07	7.04567e-05		0.996449	0.992911	1.26081e-05	1.06671e-05		1.00081	1.00161	6.48916e-07	7.07079e-05		0.996392	0.992797	1.30168e-05	1.0609e-05		1.01212	1.02439	0.000146933	4.58943e-05		1.00933	1.01875	8.70568e-05	9.57903e-06		1.01209
71			2903.41	3.1e-05				2831.67	2829.17	2831.68	2829.18	2887.21	2883.41	2887.43	2883.63	2889.98	2810.88		0.975291	0.951193	0.00061053	0.000301803		0.974429	0.949511	0.000653892	0.000639729		0.975295	0.951199	0.00061036	0.000299152		0.974434	0.949521	0.000653641	0.00063622		0.994418	0.988867	3.1159e-05	0.00011741		0.993109	0.986266	4.74849e-05	0.000365447		0.994497
			2360.15	3e-05				2313.52	2310.06	2313.55	2310.1	2355.67	2351.99	2355.83	2352.15	2357.81	2295.9		0.980243	0.960876	0.000390356	0.000153357		0.978777	0.958004	0.000450423	0.00043863		0.980257	0.960903	0.000389792	0.000151192		0.978792	0.958034	0.000449767	0.000435272		0.998101	0.996205	3.60643e-06	5.14385e-05		0.99654	0.993093	1.19688e-05	0.000247357		0.99817
								b3lyp-d3bj-def2-svp	b3lyp-d3bj-def2-tzvp	b3lyp-d4-def2-svp	b3lyp-d4-def2-tzvp	pbe0-d3bj-def2-svp	pbe0-d3bj-def2-tzvp	pbe0-d4-def2-svp	pbe0-d4-def2-tzvp	pbeh-3c	r2scan-3c
70	Methane, bromochlorodifluoro-	CBrClF2	3855.01	0.0034			https://doi.org/10.1006/jmsp.1996.0138	3818.88	3819.32	3819.17	3819.62	3870.42	3870.71	3870.36	3870.65	3885.88	3781.4		0.99063	0.981347	8.78024e-05	3.68054e-06		0.990742	0.981569	8.57186e-05	8.05566e-05		0.990704	0.981495	8.64119e-05	3.13042e-06		0.990821	0.981726	8.42563e-05	7.79752e-05		1.004	1.00801	1.5984e-05	1.70607e-06		1.00407	1.00816	1.6599e-05	6.86665e-05		1.00398
71			1700.81	0.01				1662.6	1660.79	1662.06	1660.25	1695.66	1695.5	1695.74	1695.58	1709.43	1653.39		0.977531	0.955567	0.000504863	0.00022849		0.976467	0.953488	0.000553786	0.000540732		0.977218	0.954955	0.000519027	0.000235872		0.976153	0.952875	0.000568663	0.000552394		0.996971	0.993951	9.17494e-06	6.88245e-05		0.996877	0.993764	9.7535e-06	0.000237011		0.997017
			1485.29	0.0086				1451.78	1452.2	1451.43	1451.85	1480.56	1481.81	1480.62	1481.88	1495.11	1442.39		0.977437	0.955384	0.000509078	0.00023135		0.977721	0.955939	0.000496336	0.000483966		0.977203	0.954926	0.000519686	0.00023632		0.977488	0.955483	0.000506784	0.000491411		0.996814	0.993638	1.01501e-05	7.14384e-05		0.99766	0.995325	5.47651e-06	0.000213801		0.996854
								b3lyp-d3bj-def2-svp	b3lyp-d3bj-def2-tzvp	b3lyp-d4-def2-svp	b3lyp-d4-def2-tzvp	pbe0-d3bj-def2-svp	pbe0-d3bj-def2-tzvp	pbe0-d4-def2-svp	pbe0-d4-def2-tzvp	pbeh-3c	r2scan-3c
76	Diiodomethane	CH2I2	22034.4	0.0038			https://doi.org/10.1006/jmsp.1999.7971	22468.5	22541.6	22462.9	22536.6	22805.4	22779.8	22788.4	22763	21791.1	22377.2		1.0197	1.03979	0.000388066	0.000749111		1.02302	1.04657	0.000529897	0.00054344		1.01945	1.03928	0.000378249	0.000739487		1.02279	1.0461	0.000519414	0.000535954		1.03499	1.07121	0.00122436	0.000871602		1.03383	1.0688	0.00114446	0.000445331		1.03422
72			620.568	0.00068				591.221	602.914	590.862	602.567	605.868	619.461	606.106	619.716	613.614	598.882		0.95271	0.907656	0.00223637	0.00160991		0.971552	0.943913	0.000809294	0.000793576		0.952132	0.906556	0.00229133	0.00165115		0.970994	0.942829	0.000841347	0.000821636		0.976312	0.953185	0.000561115	0.000832078		0.998217	0.996437	3.17882e-06	0.000198008		0.976697
			605.782	0.00088				578.238	589.43	577.891	589.095	592.462	605.404	592.678	605.636	599.076	585.494		0.954532	0.911131	0.00206735	0.00146596		0.973006	0.946741	0.000728671	0.000713738		0.953959	0.910037	0.0021198	0.00150497		0.972453	0.945665	0.000758837	0.000740095		0.978012	0.956507	0.000483482	0.0007374		0.999376	0.998752	3.89363e-07	0.000167104		0.978369
								b3lyp-d3bj-def2-svp	b3lyp-d3bj-def2-tzvp	b3lyp-d4-def2-svp	b3lyp-d4-def2-tzvp	pbe0-d3bj-def2-svp	pbe0-d3bj-def2-tzvp	pbe0-d4-def2-svp	pbe0-d4-def2-tzvp	pbeh-3c	r2scan-3c
77	Chloroiodomethane	CH2ClI	27418.6	0.55			https://doi.org/10.1016/0022-2852(87)90237-2	27760.6	27858.1	27750.3	27848	28154.6	28262.8	28141.5	28249.4	27371.3	27405.7		1.01247	1.0251	0.000155588	0.000403593		1.01603	1.03232	0.000256952	0.000266344		1.0121	1.02434	0.000146349	0.000391506		1.01566	1.03156	0.000245197	0.000256521		1.02684	1.05441	0.000720519	0.000458715		1.03079	1.06253	0.000948027	0.000327626		1.02637
73			1621.94	0.013				1554.45	1578.18	1553.97	1577.76	1590.72	1615.24	1591.14	1615.7	1609.24	1568.3		0.958389	0.918509	0.0017315	0.0011835		0.973018	0.946765	0.000728011	0.000713084		0.958091	0.917938	0.00175636	0.00119925		0.972756	0.946254	0.000742242	0.000723702		0.980746	0.961863	0.000370702	0.000597066		0.995865	0.991747	1.70977e-05	0.000268783		0.981007
			1545.86	0.024				1486.33	1508.07	1485.86	1507.65	1520.55	1543.07	1520.9	1543.45	1534.7	1497.91		0.961491	0.924465	0.00148296	0.000978224		0.975554	0.951706	0.0005976	0.000584048		0.961184	0.923875	0.00150669	0.00099312		0.975281	0.951174	0.000611017	0.000594163		0.983625	0.967519	0.00026813	0.000465317		0.998193	0.996389	3.26593e-06	0.000198683		0.983849
								b3lyp-d3bj-def2-svp	b3lyp-d3bj-def2-tzvp	b3lyp-d4-def2-svp	b3lyp-d4-def2-tzvp	pbe0-d3bj-def2-svp	pbe0-d3bj-def2-tzvp	pbe0-d4-def2-svp	pbe0-d4-def2-tzvp	pbeh-3c	r2scan-3c
79	fluorochloroiodomethane	CHFClI	6278.65	0.000129			https://doi.org/10.1039/B510675C	6228.77	6240.36	6229.97	6241.51	6316.17	6322.69	6315.99	6322.5	6329.31	6182.39		0.992055	0.984174	6.31175e-05	2.32428e-07		0.993902	0.987841	3.71877e-05	3.38046e-05		0.992247	0.984554	6.01097e-05	4.61475e-08		0.994084	0.988203	3.49984e-05	3.09807e-05		1.00598	1.01199	3.57119e-05	4.37368e-07		1.00701	1.01408	4.91911e-05	2.89796e-05		1.00595
74			1474.15	7.6e-05				1417.42	1438.97	1416.7	1438.34	1450.81	1472.82	1451.02	1473.06	1463.06	1427.74		0.961513	0.924507	0.00148127	0.000976843		0.976132	0.952834	0.000569673	0.000556436		0.961028	0.923574	0.00151883	0.00100306		0.975707	0.952004	0.000590151	0.000573582		0.984163	0.968577	0.000250808	0.000442526		0.999096	0.998193	8.17335e-07	0.000174332		0.984309
			1224.42	0.000104				1183.28	1198.8	1182.85	1198.43	1209.5	1225.01	1209.66	1225.18	1219.5	1189.43		0.966404	0.933937	0.00112869	0.000693078		0.979079	0.958596	0.000437685	0.000426057		0.966051	0.933254	0.00115255	0.000708095		0.978776	0.958003	0.00045044	0.000435934		0.987818	0.975784	0.000148406	0.000302791		1.00048	1.00097	2.34185e-07	0.00014001		0.987946
6-atomics								b3lyp-d3bj-def2-svp	b3lyp-d3bj-def2-tzvp	b3lyp-d4-def2-svp	b3lyp-d4-def2-tzvp	pbe0-d3bj-def2-svp	pbe0-d3bj-def2-tzvp	pbe0-d4-def2-svp	pbe0-d4-def2-tzvp	pbeh-3c	r2scan-3c
4	Boranamine	BH2NH2	138218	0.29			https://doi.org/10.1016/0022-2852(87)90279-7	136851	139547	136883	139572	136675	138996	136690	139007	139523	138703		0.990108	0.980313	9.78584e-05	5.97531e-06		1.00961	1.01932	9.24178e-05	9.80479e-05		0.990341	0.980775	9.33008e-05	4.56034e-06		1.0098	1.0197	9.60335e-05	0.000103126		0.988839	0.977803	0.000124566	0.000268467		1.00563	1.01128	3.16568e-05	4.56082e-05		0.988942
75			27487.7	0.075				27441.1	27608.8	27433.1	27600.4	27541.6	27711.7	27538.7	27708.7	27749.6	27588.3		0.998304	0.99661	2.87783e-06	3.37925e-05		1.0044	1.00883	1.93974e-05	2.20079e-05		0.998012	0.996028	3.95172e-06	3.12943e-05		1.0041	1.00821	1.6797e-05	1.98191e-05		1.00196	1.00393	3.84427e-06	1.1107e-05		1.00815	1.01636	6.6381e-05	1.81766e-05		1.00185
			22878.5	0.08				22857.7	23048.7	22853	23043.5	22922.5	23105.2	22920.9	23103.4	23146.1	23011.3		0.99909	0.998182	8.27333e-07	4.36378e-05		1.00744	1.01493	5.53302e-05	5.96957e-05		0.998887	0.997775	1.23947e-06	4.19302e-05		1.00721	1.01448	5.20274e-05	5.72677e-05		1.00192	1.00385	3.69363e-06	1.13657e-05		1.00991	1.01991	9.81586e-05	6.37574e-06		1.00185
								b3lyp-d3bj-def2-svp	b3lyp-d3bj-def2-tzvp	b3lyp-d4-def2-svp	b3lyp-d4-def2-tzvp	pbe0-d3bj-def2-svp	pbe0-d3bj-def2-tzvp	pbe0-d4-def2-svp	pbe0-d4-def2-tzvp	pbeh-3c	r2scan-3c
5	methyl isocyanide	CH3NC	157151	809.44	5.242	0.027	https://doi.org/10.1016/0022-2852(92)90526-T	156561	158885	156590	158906	156955	158858	156970	158871	159752	158172		0.996242	0.992498	1.41221e-05	1.39585e-05		1.01103	1.02218	0.000121691	0.000128148		0.996426	0.992865	1.27727e-05	1.59687e-05		1.01117	1.02246	0.000124665	0.00013274		0.99875	0.997501	1.56298e-06	4.25968e-05		1.01086	1.02183	0.000117899	2.51578e-06		0.998844
76			10052.7	0.119917	0.335323	4e-06		10058.3	10121.5	10055.8	10119	10134.8	10192.6	10134	10191.8	10225.3	10110		1.00055	1.00111	3.06398e-07	6.52865e-05		1.00684	1.01373	4.68036e-05	5.08229e-05		1.0003	1.00061	9.19156e-08	6.24511e-05		1.00659	1.01323	4.3445e-05	4.82414e-05		1.00816	1.0164	6.66608e-05	8.05671e-06		1.01391	1.02802	0.000193518	2.04278e-06		1.00809
			10052.7	0.119917	0.335323	4e-06		10058.3	10121.5	10055.8	10119	10134.8	10192.6	10134	10191.8	10225.2	10110		1.00055	1.00111	3.05506e-07	6.52734e-05		1.00684	1.01373	4.67801e-05	5.07984e-05		1.0003	1.0006	9.14238e-08	6.24382e-05		1.00659	1.01322	4.34221e-05	4.82173e-05		1.00816	1.01639	6.66486e-05	8.05248e-06		1.01391	1.02801	0.000193451	2.03599e-06		1.00809
								b3lyp-d3bj-def2-svp	b3lyp-d3bj-def2-tzvp	b3lyp-d4-def2-svp	b3lyp-d4-def2-tzvp	pbe0-d3bj-def2-svp	pbe0-d3bj-def2-tzvp	pbe0-d4-def2-svp	pbe0-d4-def2-tzvp	pbeh-3c	r2scan-3c
8	Methyl alcohol	CH3OH	127631		4.25732		https://ui.adsabs.harvard.edu/abs/1988A%26AS...76...35P/abstract	126936	128333	126948	128336	127491	128552	127493	128551	129782	127429		0.994555	0.989139	2.96524e-05	4.14506e-06		1.00549	1.01102	3.01863e-05	3.3426e-05		0.994646	0.98932	2.86671e-05	4.85005e-06		1.00552	1.01108	3.05099e-05	3.45453e-05		0.998901	0.997802	1.20859e-06	4.06608e-05		1.00721	1.01447	5.20027e-05	2.69158e-05		0.998917
77			24679.9		0.823232			24954.9	24734.9	24951.5	24732.3	25251.9	25067.2	25251	25068.1	25174.4	24591.2		1.01114	1.02241	0.00012421	0.000351604		1.00223	1.00447	4.97703e-06	6.33685e-06		1.01101	1.02214	0.000121154	0.000349232		1.00212	1.00425	4.51356e-06	6.13683e-06		1.02318	1.04689	0.000537246	0.000315883		1.01569	1.03163	0.000246285	1.01743e-05		1.02314
			23769.6		0.792868			24071.5	23876.4	24068.3	23874	24357.5	24191.4	24356.6	24192.5	24289.5	23741.2		1.0127	1.02556	0.000161285	0.000412806		1.00449	1.009	2.01807e-05	2.2842e-05		1.01257	1.0253	0.000157983	0.000410538		1.00439	1.00881	1.93096e-05	2.25418e-05		1.02473	1.05008	0.000611692	0.000373213		1.01775	1.03581	0.000314926	2.72184e-05		1.0247
								b3lyp-d3bj-def2-svp	b3lyp-d3bj-def2-tzvp	b3lyp-d4-def2-svp	b3lyp-d4-def2-tzvp	pbe0-d3bj-def2-svp	pbe0-d3bj-def2-tzvp	pbe0-d4-def2-svp	pbe0-d4-def2-tzvp	pbeh-3c	r2scan-3c
9	formamide	CHONH2	72716.9	0.0002			https://doi.org/10.1016/j.jms.2008.12.001	73506.5	73836	73502.6	73831.8	73889.2	74101.7	73887	74099.4	74754.4	73132		1.01086	1.02184	0.000117908	0.000340865		1.01539	1.03102	0.000236834	0.000245849		1.01081	1.02173	0.000116754	0.000341676		1.01533	1.0309	0.000235089	0.000246177		1.01612	1.0325	0.000259904	0.000115634		1.01904	1.03845	0.00036264	4.22257e-05		1.01609
78			11373.6	0.00032				11308	11385.9	11306.8	11384.8	11396.3	11471.2	11396.1	11470.9	11523.5	11382.9		0.994231	0.988495	3.32802e-05	2.92414e-06		1.00109	1.00217	1.17927e-06	1.88239e-06		0.994126	0.988286	3.45039e-05	2.81734e-06		1.00098	1.00197	9.64639e-07	1.78091e-06		1.002	1.004	3.99961e-06	1.08485e-05		1.00858	1.01724	7.36678e-05	1.46936e-05		1.00198
			9833.88	0.0003				9800.32	9864.73	9799.36	9863.77	9873.49	9933.47	9873.25	9933.23	9984.43	9849.76		0.996588	0.993187	1.16447e-05	1.66807e-05		1.00314	1.00628	9.84356e-06	1.17244e-05		0.996489	0.992991	1.23254e-05	1.64812e-05		1.00304	1.00609	9.24066e-06	1.15119e-05		1.00403	1.00807	1.62211e-05	1.63014e-06		1.01013	1.02036	0.00010255	5.32938e-06		1.004
								b3lyp-d3bj-def2-svp	b3lyp-d3bj-def2-tzvp	b3lyp-d4-def2-svp	b3lyp-d4-def2-tzvp	pbe0-d3bj-def2-svp	pbe0-d3bj-def2-tzvp	pbe0-d4-def2-svp	pbe0-d4-def2-tzvp	pbeh-3c	r2scan-3c
10	formaldoxime	CH2NOH	67679.4	0.00067			https://doi.org/10.1051/0004-6361/202040142	70773.1	70062.9	70790.6	70080.3	72095.9	71225	72103	71231.8	72114.5	68952.4		1.04571	1.09351	0.00208949	0.0028705		1.03522	1.07167	0.00124023	0.00126115		1.04597	1.09405	0.00211318	0.00290691		1.03547	1.07221	0.00125839	0.00128438		1.06526	1.13477	0.00425834	0.00355552		1.05239	1.10752	0.00274449	0.00155491		1.06536
79			11859.2	0.0001				11847.3	11838.4	11844.5	11835.6	11986.7	11999.7	11985.7	11998.7	12142.8	11821.6		0.998995	0.997991	1.00993e-06	4.23774e-05		0.99824	0.996483	3.09736e-06	2.1747e-06		0.998758	0.997517	1.54376e-06	4.02616e-05		0.998005	0.996014	3.97911e-06	2.701e-06		1.01075	1.02162	0.000115588	2.92825e-05		1.01184	1.02383	0.000140277	3.75145e-07		1.01067
			10080.1	0.0001				10148.5	10127.2	10146.8	10125.5	10277.9	10269.5	10277.3	10268.9	10392.9	10091.5		1.00678	1.01361	4.59693e-05	0.000206019		1.00467	1.00936	2.17976e-05	2.45607e-05		1.00661	1.01327	4.37009e-05	0.000203291		1.0045	1.00903	2.02736e-05	2.35828e-05		1.01962	1.03963	0.000384999	0.000202626		1.01879	1.03793	0.000353021	3.90249e-05		1.01956
								b3lyp-d3bj-def2-svp	b3lyp-d3bj-def2-tzvp	b3lyp-d4-def2-svp	b3lyp-d4-def2-tzvp	pbe0-d3bj-def2-svp	pbe0-d3bj-def2-tzvp	pbe0-d4-def2-svp	pbe0-d4-def2-tzvp	pbeh-3c	r2scan-3c
15	Ethene, fluoro-	CH2CHF	64584.7				https://doi.org/10.1016/0022-2852(73)90176-8	65519.7	65531.4	65510.9	65522.4	65917	65998.8	65913.2	65995	66420.5	65169.3		1.01448	1.02916	0.00020959	0.000488783		1.01466	1.02953	0.000214863	0.000223447		1.01434	1.02889	0.000205679	0.000486097		1.01452	1.02925	0.000210801	0.000221299		1.02063	1.04168	0.000425548	0.00023216		1.0219	1.04427	0.000479427	8.67823e-05		1.02057
80			10636.9					10559.9	10619.4	10559.4	10618.9	10642.5	10706.4	10642.4	10706.4	10727.9	10614.1		0.99276	0.985573	5.24162e-05	5.19589e-08		0.998353	0.996709	2.71283e-06	1.85447e-06		0.992714	0.985482	5.30793e-05	6.56482e-08		0.998309	0.99662	2.86083e-06	1.79558e-06		1.00053	1.00106	2.82011e-07	2.26081e-05		1.00654	1.01312	4.27415e-05	3.42616e-05		1.00052
			9118.03					9094.16	9138.47	9093.63	9137.95	9163.11	9212.03	9162.98	9211.91	9236.13	9127.48		0.997381	0.99477	6.85696e-06	2.38538e-05		1.00224	1.00449	5.02452e-06	6.39044e-06		0.997323	0.994654	7.16417e-06	2.40119e-05		1.00218	1.00437	4.77016e-06	6.43556e-06		1.00494	1.00991	2.44431e-05	1.3334e-07		1.01031	1.02072	0.000106279	4.52965e-06		1.00493
								b3lyp-d3bj-def2-svp	b3lyp-d3bj-def2-tzvp	b3lyp-d4-def2-svp	b3lyp-d4-def2-tzvp	pbe0-d3bj-def2-svp	pbe0-d3bj-def2-tzvp	pbe0-d4-def2-svp	pbe0-d4-def2-tzvp	pbeh-3c	r2scan-3c
16	Ethene, 1,1-difluoro-	CH2CF2	11002.5				https://doi.org/10.1063/1.1733575	10958.6	10962	10959.5	10962.9	11091	11106.9	11091.4	11107.3	11128.5	10956.2		0.996013	0.992042	1.5897e-05	1.22865e-05		0.99632	0.992654	1.35412e-05	1.15269e-05		0.996093	0.992202	1.52621e-05	1.34013e-05		0.996402	0.992816	1.29478e-05	1.05467e-05		1.00805	1.01616	6.47364e-05	7.40029e-06		1.00949	1.01907	9.00403e-05	8.6343e-06		1.00808
81			10428.9					10399.1	10433.8	10397.8	10432.7	10473.8	10508.7	10473.4	10508.3	10564.3	10409.8		0.997137	0.994283	8.1957e-06	2.15107e-05		1.00047	1.00095	2.23621e-07	5.75731e-07		0.997018	0.994045	8.89053e-06	2.10935e-05		1.00036	1.00072	1.28798e-07	5.05538e-07		1.0043	1.00862	1.84876e-05	1.01211e-06		1.00765	1.01535	5.84837e-05	2.26313e-05		1.00426
			5345.36					5335.75	5345.69	5335.63	5345.6	5386.77	5399.74	5386.76	5399.75	5419.54	5338		0.998202	0.996406	3.23435e-06	3.26081e-05		1.00006	1.00013	3.91697e-09	1.21349e-07		0.99818	0.996363	3.31333e-06	3.32126e-05		1.00004	1.00009	1.94454e-09	1.56906e-07		1.00775	1.01555	6.00068e-05	5.86823e-06		1.01017	1.02045	0.000103507	5.11639e-06		1.00775
								b3lyp-d3bj-def2-svp	b3lyp-d3bj-def2-tzvp	b3lyp-d4-def2-svp	b3lyp-d4-def2-tzvp	pbe0-d3bj-def2-svp	pbe0-d3bj-def2-tzvp	pbe0-d4-def2-svp	pbe0-d4-def2-tzvp	pbeh-3c	r2scan-3c
22	thioformamide	CHSNH2	61753.8				https://doi.org/10.1016/0022-2852(74)90273-2	62237.8	62955.7	62259.5	62978.9	62616.9	63182.2	62620.6	63186.3	63391	61945.1		1.00784	1.01574	6.14307e-05	0.000237747		1.01946	1.0393	0.000378798	0.000390222		1.00819	1.01645	6.70626e-05	0.000251175		1.01984	1.04007	0.000393554	0.000407926		1.01398	1.02815	0.000195323	7.42858e-05		1.02313	1.04679	0.000534989	0.000110976		1.01404
82			6101.74					6031.75	6074.6	6029.11	6071.9	6084.6	6127.81	6083.94	6127.15	6155.76	6063.43		0.988529	0.97719	0.000131575	1.62779e-05		0.995553	0.991125	1.97787e-05	1.73293e-05		0.988097	0.976335	0.00014169	1.93307e-05		0.99511	0.990243	2.39165e-05	2.06131e-05		0.99719	0.994388	7.89504e-06	6.52541e-05		1.00427	1.00856	1.82566e-05	6.54544e-05		0.997083
			5549.96					5498.83	5540.04	5496.81	5537.97	5545.71	5586.04	5545.2	5585.52	5610.9	5522.84		0.990788	0.98166	8.4865e-05	3.09481e-06		0.998213	0.99643	3.19212e-06	2.25424e-06		0.990423	0.980937	9.17219e-05	4.21395e-06		0.99784	0.995686	4.66369e-06	3.27001e-06		0.999234	0.998469	5.86753e-07	3.65419e-05		1.0065	1.01304	4.22657e-05	3.46849e-05		0.999142
								b3lyp-d3bj-def2-svp	b3lyp-d3bj-def2-tzvp	b3lyp-d4-def2-svp	b3lyp-d4-def2-tzvp	pbe0-d3bj-def2-svp	pbe0-d3bj-def2-tzvp	pbe0-d4-def2-svp	pbe0-d4-def2-tzvp	pbeh-3c	r2scan-3c
24	Ethene, chloro-	C2H3Cl (35)	56839.8				https://doi.org/10.1006/jmsp.1996.0137	57307.2	58022.2	57317.4	58030.8	57643.5	58256.1	57642	58253.7	58176	57390.2		1.00822	1.01651	6.76242e-05	0.000249879		1.0208	1.04204	0.000432752	0.000444973		1.0084	1.01687	7.0584e-05	0.000258		1.02095	1.04235	0.000439044	0.000454233		1.01414	1.02848	0.00019992	7.71162e-05		1.02492	1.05045	0.000620848	0.000151278		1.01411
83			6029.99					5924.83	5979.07	5922.89	5977.27	5999.66	6058.46	5999.43	6058.32	6080.07	5962.29		0.98256	0.965424	0.000304162	0.000100985		0.991555	0.983181	7.13191e-05	6.66138e-05		0.982237	0.96479	0.00031551	0.000106099		0.991256	0.982588	7.64611e-05	7.04807e-05		0.994969	0.989964	2.53082e-05	0.000105826		1.00472	1.00946	2.22877e-05	5.84872e-05		0.994932
			5445.21					5369.68	5420.5	5368.17	5419.09	5434.07	5487.75	5433.87	5487.62	5504.76	5401.16		0.986127	0.972447	0.000192452	4.16639e-05		0.995461	0.990943	2.06011e-05	1.80998e-05		0.98585	0.971901	0.000200212	4.43556e-05		0.995203	0.990428	2.30149e-05	1.97765e-05		0.997953	0.995911	4.18921e-06	5.35674e-05		1.00781	1.01568	6.10254e-05	2.11127e-05		0.997917
								b3lyp-d3bj-def2-svp	b3lyp-d3bj-def2-tzvp	b3lyp-d4-def2-svp	b3lyp-d4-def2-tzvp	pbe0-d3bj-def2-svp	pbe0-d3bj-def2-tzvp	pbe0-d4-def2-svp	pbe0-d4-def2-tzvp	pbeh-3c	r2scan-3c
25	Ethene, 1,1-dichloro-	CH2CCl2	7467.08	0.036			https://doi.org/10.1016/0022-2860(88)80285-0	7388.86	7462.85	7386.55	7461.05	7456.04	7536.9	7455.58	7536.72	7574.85	7426.29		0.989525	0.979159	0.000109732	9.19188e-06		0.999434	0.998869	3.20013e-07	7.84617e-08		0.989216	0.978548	0.000116298	1.06862e-05		0.999193	0.998386	6.51732e-07	2.07555e-07		0.998522	0.997047	2.18394e-06	4.56036e-05		1.00935	1.01879	8.74377e-05	9.45476e-06		0.99846
84			3411.56	0.018				3343.72	3374.9	3344.17	3375.4	3402.82	3433.92	3403.41	3434.54	3429.45	3362.7		0.980113	0.960622	0.000395487	0.000156604		0.989253	0.978622	0.000115489	0.000109494		0.980246	0.960881	0.000390236	0.000151471		0.9894	0.978911	0.000112369	0.000105107		0.997438	0.994883	6.56376e-06	6.13322e-05		1.00655	1.01315	4.29399e-05	3.40866e-05		0.997611
			2339.09	0.014				2301.99	2323.95	2301.98	2324.01	2336.49	2359.08	2336.72	2359.36	2360.68	2314.62		0.984138	0.968529	0.000251588	7.15468e-05		0.993527	0.987097	4.18949e-05	3.83004e-05		0.984134	0.96852	0.00025172	7.03771e-05		0.993554	0.987149	4.15557e-05	3.7169e-05		0.998887	0.997776	1.23804e-06	4.08299e-05		1.00855	1.01717	7.30842e-05	1.49527e-05		0.998987
								b3lyp-d3bj-def2-svp	b3lyp-d3bj-def2-tzvp	b3lyp-d4-def2-svp	b3lyp-d4-def2-tzvp	pbe0-d3bj-def2-svp	pbe0-d3bj-def2-tzvp	pbe0-d4-def2-svp	pbe0-d4-def2-tzvp	pbeh-3c	r2scan-3c
26	Ethene, 1,2-dichloro-, (Z)-	CHClCHCl	11518.2	0.086			https://doi.org/10.1016/0022-2860(88)80285-0	11512.8	11684.4	11516.3	11687.9	11645.2	11823.7	11643	11821.5	11711.4	11549.1		0.999535	0.999069	2.16566e-07	4.97511e-05		1.01443	1.02907	0.000208302	0.000216753		0.999834	0.999668	2.75469e-08	5.52033e-05		1.01473	1.02968	0.000217011	0.000227662		1.01102	1.02217	0.000121535	3.22965e-05		1.02653	1.05376	0.000703816	0.000192998		1.01084
85			2545.26	0.019				2471.06	2478.34	2469.22	2476.58	2513.99	2519.69	2514.56	2520.3	2558.75	2489.14		0.97085	0.94255	0.000849721	0.000477289		0.973711	0.948113	0.000691126	0.000676574		0.970126	0.941145	0.000892431	0.000506404		0.973019	0.946767	0.000727949	0.000709585		0.987717	0.975585	0.000150872	0.000306289		0.989955	0.98001	0.00010091	0.000494276		0.98794
			2082.63	0.017				2034.41	2044.66	2033.26	2043.56	2067.63	2077.06	2067.94	2077.4	2099.95	2047.79		0.976842	0.954221	0.000536279	0.000249943		0.981765	0.963862	0.000332522	0.00032237		0.976294	0.953151	0.000561953	0.000265316		0.98124	0.962832	0.000351929	0.000339089		0.992794	0.98564	5.19286e-05	0.00015503		0.997322	0.994652	7.16905e-06	0.000223655		0.992946
								b3lyp-d3bj-def2-svp	b3lyp-d3bj-def2-tzvp	b3lyp-d4-def2-svp	b3lyp-d4-def2-tzvp	pbe0-d3bj-def2-svp	pbe0-d3bj-def2-tzvp	pbe0-d4-def2-svp	pbe0-d4-def2-tzvp	pbeh-3c	r2scan-3c
28	1-chloro-1-fluoroethylene	C2H2ClF	10681.7	0.00047			https://doi.org/10.1016/j.jms.2008.11.002	10637	10699.7	10637.5	10700.3	10720	10784.1	10720	10784.2	10802.1	10661.6		0.995824	0.991666	1.74375e-05	1.09897e-05		1.00169	1.00339	2.86453e-06	3.91535e-06		0.995871	0.991759	1.7049e-05	1.1811e-05		1.00174	1.00349	3.03814e-06	4.39171e-06		1.00359	1.00719	1.28668e-05	2.94106e-06		1.00959	1.01927	9.19771e-05	8.05512e-06		1.00359
86			5102.15	0.00016				5026.98	5059.11	5026.39	5058.59	5100.54	5133.24	5100.63	5133.37	5160.39	5050.39		0.985265	0.970748	0.000217109	5.36283e-05		0.991564	0.983199	7.11715e-05	6.64712e-05		0.98515	0.97052	0.000220528	5.42562e-05		0.991461	0.982996	7.29093e-05	6.70711e-05		0.999683	0.999366	1.00648e-07	3.13444e-05		1.00609	1.01222	3.71236e-05	3.95974e-05		0.9997
			3448.31	0.00018				3413.69	3434.97	3413.47	3434.78	3456.12	3477.8	3456.17	3477.87	3492.13	3427.02		0.989962	0.980024	0.000100766	6.71562e-06		0.996131	0.992278	1.49669e-05	1.28455e-05		0.989898	0.979898	0.000102054	6.66576e-06		0.996078	0.992171	1.53853e-05	1.27576e-05		1.00227	1.00454	5.13261e-06	9.17774e-06		1.00855	1.01718	7.31572e-05	1.49201e-05		1.00228
								b3lyp-d3bj-def2-svp	b3lyp-d3bj-def2-tzvp	b3lyp-d4-def2-svp	b3lyp-d4-def2-tzvp	pbe0-d3bj-def2-svp	pbe0-d3bj-def2-tzvp	pbe0-d4-def2-svp	pbe0-d4-def2-tzvp	pbeh-3c	r2scan-3c
29	(Z)-1-Chloro-2-fluoroethene	CHFCHCl	14617.4	0.0019			DOI: 10.1039/B105545N	16520.5	16570.3	16513.7	16563.7	16705.3	16788.5	16700.8	16784	16614.9	16417		1.13019	1.27733	0.0169498	0.0192358		1.1336	1.28505	0.0178496	0.0179362		1.12973	1.27628	0.0168286	0.0191291		1.13315	1.28403	0.0177289	0.0178353		1.14284	1.30608	0.0204029	0.0187145		1.14853	1.31911	0.0220602	0.0180601		1.14253
87			3750.17	0.00039				3662.69	3692.52	3664.09	3693.9	3707.46	3731.55	3708.73	3732.81	3797.11	3710.69		0.976672	0.953888	0.00054419	0.000255394		0.984626	0.969489	0.000236353	0.000227781		0.977045	0.954617	0.000526925	0.000241246		0.984994	0.970214	0.000225167	0.000214882		0.988611	0.977351	0.000129716	0.000275964		0.995034	0.990092	2.46649e-05	0.000296384		0.988949
			2980.94	0.00035				2998.01	3019.63	2998.72	3020.33	3034.1	3052.97	3034.8	3053.67	3090.76	3026.59		1.00573	1.01148	3.27833e-05	0.000176652		1.01298	1.02612	0.0001684	0.000175996		1.00596	1.01196	3.55778e-05	0.000185154		1.01321	1.0266	0.000174581	0.000184133		1.01783	1.03598	0.000317932	0.000155087		1.02416	1.04891	0.000583808	0.000133497		1.01807
								b3lyp-d3bj-def2-svp	b3lyp-d3bj-def2-tzvp	b3lyp-d4-def2-svp	b3lyp-d4-def2-tzvp	pbe0-d3bj-def2-svp	pbe0-d3bj-def2-tzvp	pbe0-d4-def2-svp	pbe0-d4-def2-tzvp	pbeh-3c	r2scan-3c
30	(E)-1-chloro-2-fluoroethene	CHFCHCl	53897.2	0.22			https://doi.org/10.1063/1.1667461	54338.5	54812.8	54335.2	54808	54599.3	54955.2	54592.3	54947.3	55240.3	54001.4		1.00819	1.01644	6.70558e-05	0.000248777		1.01699	1.03426	0.00028859	0.000298548		1.00813	1.01632	6.60469e-05	0.000249191		1.0169	1.03408	0.000285581	0.000297807		1.01303	1.02622	0.000169708	5.89111e-05		1.01963	1.03965	0.000385389	5.01135e-05		1.0129
88			2474.38	0.21				2439.03	2455.53	2438.93	2455.49	2469.27	2488.43	2469.44	2488.64	2492.49	2456.48		0.985714	0.971631	0.0002041	4.72178e-05		0.992383	0.984823	5.80234e-05	5.37837e-05		0.98567	0.971546	0.000205339	4.68048e-05		0.992363	0.984784	5.8326e-05	5.31125e-05		0.997932	0.995868	4.27653e-06	5.38769e-05		1.00568	1.01139	3.22319e-05	4.4932e-05		0.998001
			2364.06	0.21				2334.26	2350.25	2334.15	2350.19	2362.42	2380.63	2362.57	2380.81	2384.88	2349.6		0.987393	0.974945	0.000158941	2.68295e-05		0.994156	0.988347	3.4149e-05	3.09095e-05		0.987349	0.974857	0.000160055	2.65255e-05		0.994134	0.988302	3.44153e-05	3.0432e-05		0.999307	0.998615	4.79595e-07	3.56637e-05		1.00701	1.01407	4.91355e-05	2.90217e-05		0.999368
								b3lyp-d3bj-def2-svp	b3lyp-d3bj-def2-tzvp	b3lyp-d4-def2-svp	b3lyp-d4-def2-tzvp	pbe0-d3bj-def2-svp	pbe0-d3bj-def2-tzvp	pbe0-d4-def2-svp	pbe0-d4-def2-tzvp	pbeh-3c	r2scan-3c
32	Trichloroethylene	CHClCCl2	3945.91	0.00071			https://doi.org/10.1006/jmsp.1996.0165	3864.95	3890.28	3864.26	3889.61	3932.75	3952.19	3933.52	3952.94	3991.76	3873.73		0.979483	0.959387	0.000420947	0.000172897		0.985901	0.972001	0.000198773	0.000190908		0.979307	0.959043	0.000428185	0.000175634		0.985733	0.971669	0.000203553	0.000193773		0.996666	0.993342	1.11183e-05	7.39571e-05		1.00159	1.00319	2.53435e-06	0.000115309		0.99686
89			1533.39	0.00028				1505.11	1518.73	1505.04	1518.74	1527.83	1541.91	1528.07	1542.2	1543.25	1512.61		0.98156	0.96346	0.000340034	0.000122244		0.990441	0.980973	9.13738e-05	8.60432e-05		0.981512	0.963365	0.000341812	0.000121694		0.99045	0.980991	9.12007e-05	8.46633e-05		0.99638	0.992773	1.31041e-05	7.89231e-05		1.00556	1.01114	3.08772e-05	4.6543e-05		0.996536
			1103.48	0.00014				1083.26	1092.3	1083.17	1092.26	1100.36	1109.17	1100.54	1109.39	1112.97	1087.83		0.981678	0.963691	0.000335705	0.000119635		0.989872	0.979847	0.000102574	9.69248e-05		0.981594	0.963526	0.000338791	0.00011988		0.989831	0.979766	0.000103406	9.64417e-05		0.997171	0.99435	8.004e-06	6.55651e-05		1.00516	1.01035	2.66323e-05	5.20338e-05		0.997338
								b3lyp-d3bj-def2-svp	b3lyp-d3bj-def2-tzvp	b3lyp-d4-def2-svp	b3lyp-d4-def2-tzvp	pbe0-d3bj-def2-svp	pbe0-d3bj-def2-tzvp	pbe0-d4-def2-svp	pbe0-d4-def2-tzvp	pbeh-3c	r2scan-3c
39	Methane selenol	CH3SeH	93727				https://doi.org/10.1063/1.1679859	93697.5	94830.9	93700.2	94833.1	94218.3	95088.6	94219.2	95089.3	96347.3	94846.9		0.999685	0.999371	9.89736e-08	5.1917e-05		1.01178	1.02369	0.000138719	0.000145613		0.999714	0.999428	8.17485e-08	5.3422e-05		1.0118	1.02374	0.000139276	0.000147809		1.00524	1.01051	2.74784e-05	4.72606e-09		1.01453	1.02927	0.00021105	4.15414e-06		1.00525
90			9340.36					9202.87	9214.69	9199.33	9211.25	9389.15	9401.14	9388.33	9400.36	9290.38	9202.11		0.98528	0.970777	0.000216671	5.34095e-05		0.986545	0.973271	0.000181035	0.000173528		0.984901	0.97003	0.000227975	5.801e-05		0.986177	0.972545	0.000191078	0.000181601		1.00522	1.01047	2.72885e-05	7.53299e-09		1.00651	1.01306	4.23383e-05	3.46199e-05		1.00514
			8982.41					8862.58	8875.42	8859.28	8872.21	9038.9	9051.11	9038.13	9050.37	8953.19	8867.17		0.98666	0.973497	0.000177964	3.50268e-05		0.988089	0.976319	0.000141881	0.000135235		0.986292	0.972772	0.000187909	3.86261e-05		0.987731	0.975613	0.000150518	0.000142108		1.00629	1.01262	3.95552e-05	9.46791e-07		1.00765	1.01535	5.84879e-05	2.26287e-05		1.0062
								b3lyp-d3bj-def2-svp	b3lyp-d3bj-def2-tzvp	b3lyp-d4-def2-svp	b3lyp-d4-def2-tzvp	pbe0-d3bj-def2-svp	pbe0-d3bj-def2-tzvp	pbe0-d4-def2-svp	pbe0-d4-def2-tzvp	pbeh-3c	r2scan-3c
40	vinyl bromide	C2H3Br	54263.8	0.138			https://doi.org/10.1016/0022-2852(90)90067-Z	54921	55538.1	54934.6	55550.6	55273.2	55737.2	55269.4	55732.3	55579.8	54915.5		1.01211	1.02437	0.000146693	0.00038908		1.02348	1.04752	0.000551504	0.000565326		1.01236	1.02488	0.000152838	0.000402156		1.02371	1.04799	0.000562356	0.000579576		1.0186	1.03755	0.000346011	0.00017477		1.02715	1.05504	0.00073733	0.000210511		1.01853
91			4162.5	0.006				4088.27	4104.32	4086.74	4102.9	4148.54	4169.59	4148.55	4169.68	4171.27	4098.84		0.982165	0.964649	0.000318076	0.00010913		0.986021	0.972238	0.000195409	0.000187611		0.981799	0.96393	0.000331259	0.000115383		0.98568	0.971565	0.000205068	0.000195251		0.996645	0.993302	1.12544e-05	7.43057e-05		1.0017	1.00341	2.89758e-06	0.000112982		0.996648
			3862.49	0.006				3805.02	3821.88	3803.77	3820.7	3858.91	3879.38	3858.9	3879.43	3880.07	3814.16		0.985123	0.970467	0.000221333	5.5754e-05		0.989486	0.979082	0.000110549	0.000104684		0.984798	0.969827	0.000231096	5.96018e-05		0.989182	0.978481	0.000117027	0.000109615		0.999073	0.998147	8.58755e-07	3.84999e-05		1.00437	1.00877	1.91287e-05	6.38523e-05		0.999071
								b3lyp-d3bj-def2-svp	b3lyp-d3bj-def2-tzvp	b3lyp-d4-def2-svp	b3lyp-d4-def2-tzvp	pbe0-d3bj-def2-svp	pbe0-d3bj-def2-tzvp	pbe0-d4-def2-svp	pbe0-d4-def2-tzvp	pbeh-3c	r2scan-3c
43	Vinyl iodide	C2H3I	52696.1	0.035			https://doi.org/10.1016/0022-2852(90)90067-Z	53085	53925.3	53099.5	53933.4	53442.3	54023.7	53432.3	54009.3	53502.6	53270.3		1.00738	1.01481	5.44644e-05	0.000223736		1.02333	1.0472	0.000544108	0.000557835		1.00766	1.01537	5.85999e-05	0.000234406		1.02348	1.04751	0.000551297	0.000568344		1.01416	1.02852	0.000200532	7.7494e-05		1.02519	1.05102	0.000634712	0.000158075		1.01397
90			3258.79	0.004				3175.85	3220.71	3174.63	3219.83	3227.27	3276.66	3227.59	3277.2	3248.19	3209.16		0.974551	0.949749	0.00064767	0.00032828		0.988316	0.976768	0.000136522	0.000130002		0.974175	0.949017	0.000666939	0.000339452		0.988045	0.976233	0.000142924	0.00013473		0.990327	0.980748	9.35596e-05	0.000222146		1.00548	1.011	3.00639e-05	4.75411e-05		0.990427
			3066.62	0.007				2996.58	3039.2	2995.54	3038.43	3043.48	3089.29	3043.74	3089.72	3062.27	3026.82		0.977162	0.954845	0.000521585	0.00023987		0.991058	0.982195	7.99659e-05	7.49813e-05		0.976821	0.95418	0.000537253	0.000248305		0.99081	0.981704	8.44611e-05	7.81722e-05		0.992454	0.984966	5.69347e-05	0.00016355		1.00739	1.01484	5.46354e-05	2.50998e-05		0.992538
7-atomics								b3lyp-d3bj-def2-svp	b3lyp-d3bj-def2-tzvp	b3lyp-d4-def2-svp	b3lyp-d4-def2-tzvp	pbe0-d3bj-def2-svp	pbe0-d3bj-def2-tzvp	pbe0-d4-def2-svp	pbe0-d4-def2-tzvp	pbeh-3c	r2scan-3c
1	cyclopropene	C3H4	30063.7				https://doi.org/10.1063/1.1729978	29879.7	30450.9	29877.5	30448.7	29932.5	30421.7	29931.8	30420.9	30482.2	30306.8		0.99388	0.987798	3.74494e-05	1.84059e-06		1.01288	1.02592	0.000165873	0.000173412		0.993807	0.987652	3.83532e-05	1.84166e-06		1.01281	1.02578	0.00016403	0.000173289		0.995637	0.991293	1.90352e-05	9.26007e-05		1.01191	1.02396	0.000141821	3.00647e-07		0.995612
91			21825.6					21826.2	21951.8	21821.1	21946.9	22062.3	22160.9	22060.7	22159.3	22303.8	21991.1		1.00003	1.00005	6.50982e-10	5.69725e-05		1.00578	1.0116	3.34449e-05	3.68517e-05		0.999793	0.999586	4.2947e-08	5.45872e-05		1.00556	1.01114	3.08727e-05	3.49314e-05		1.01085	1.02181	0.000117656	3.03226e-05		1.01536	1.03096	0.000235991	8.19296e-06		1.01077
			13795.7					13785.8	13934.6	13783.1	13932	13888.7	14014.7	13887.8	14013.8	14076.5	13929.8		0.999279	0.998559	5.19364e-07	4.61886e-05		1.01007	1.02023	0.000101337	0.000107231		0.999085	0.998171	8.37533e-07	4.45557e-05		1.00988	1.01985	9.75532e-05	0.000104702		1.00674	1.01353	4.54264e-05	2.02001e-06		1.01587	1.032	0.000252005	1.13481e-05		1.00667
								b3lyp-d3bj-def2-svp	b3lyp-d3bj-def2-tzvp	b3lyp-d4-def2-svp	b3lyp-d4-def2-tzvp	pbe0-d3bj-def2-svp	pbe0-d3bj-def2-tzvp	pbe0-d4-def2-svp	pbe0-d4-def2-tzvp	pbeh-3c	r2scan-3c
5	malononitrile	3H2N2	20882.8	0.00053			Rotational spectroscopy of malononitrile and its corresponding monoisocyanide isomer, isocyanoacetonitrile | Astronomy & Astrophysics (A&A)	21004.4	21216	20991.9	21199.9	21211.9	21315.2	21200.3	21302.1	21195.6	21014.9		1.00583	1.01168	3.3932e-05	0.000179325		1.01596	1.03217	0.000254617	0.000263966		1.00522	1.01047	2.72869e-05	0.000165392		1.01519	1.0306	0.00023062	0.000241601		1.01576	1.03177	0.000248349	0.00010801		1.02071	1.04184	0.000428752	6.62737e-05		1.01521
92			2942.3	7.5e-05				2906.16	2940.86	2906.2	2941.1	2920.79	2955.18	2921.32	2955.81	2971.95	2950.34		0.987715	0.975581	0.000150917	2.35705e-05		0.999509	0.999018	2.41325e-07	4.2288e-08		0.987728	0.975607	0.000150592	2.2731e-05		0.999591	0.999182	1.67378e-07	3.27885e-09		0.992687	0.985427	5.34819e-05	0.000157692		1.00438	1.00877	1.91477e-05	6.38181e-05		0.992867
			2616.73	6.6e-05				2594.46	2624.76	2594.29	2624.7	2609.24	2637.8	2609.49	2638.09	2649.11	2629.45		0.991492	0.983056	7.23871e-05	1.10198e-06		1.00307	1.00615	9.43268e-06	1.12754e-05		0.991426	0.982926	7.35068e-05	1.08497e-06		1.00305	1.0061	9.27791e-06	1.15535e-05		0.99714	0.994289	8.17777e-06	6.6058e-05		1.00805	1.01617	6.48278e-05	1.89931e-05		0.997233
								b3lyp-d3bj-def2-svp	b3lyp-d3bj-def2-tzvp	b3lyp-d4-def2-svp	b3lyp-d4-def2-tzvp	pbe0-d3bj-def2-svp	pbe0-d3bj-def2-tzvp	pbe0-d4-def2-svp	pbe0-d4-def2-tzvp	pbeh-3c	r2scan-3c
7	acetaldehyde	CH3CHO	56357	0.2			https://doi.org/10.1016/0022-2852(91)90032-6	56807.3	57340.4	56800.1	57333.1	57053.8	57484.1	57051.1	57481.4	57715.6	57042.1		1.00799	1.01604	6.38331e-05	0.000242486		1.01745	1.0352	0.00030448	0.000314711		1.00786	1.01579	6.18129e-05	0.000240838		1.01732	1.03494	0.000299961	0.000312494		1.01236	1.02488	0.00015288	4.92258e-05		1.02	1.0404	0.000399982	5.53951e-05		1.01232
93			10488	0.8				10103.4	10182.2	10101.8	10180.6	10191.3	10255.9	10191	10255.6	10306.8	10176.1		0.963328	0.928001	0.00134482	0.000865852		0.970843	0.942536	0.000850147	0.000834047		0.96318	0.927715	0.00135573	0.000870421		0.970694	0.942246	0.00085886	0.00083895		0.971712	0.944225	0.000800202	0.00111699		0.977873	0.956235	0.000489613	0.00116727		0.971677
			9044	0.8				9063.56	9132.07	9062.04	9130.55	9138.95	9194.75	9138.54	9194.35	9240.46	9119.4		1.00216	1.00433	4.6787e-06	9.41213e-05		1.00974	1.01957	9.4826e-05	0.000100529		1.00199	1.00399	3.97899e-06	9.22948e-05		1.00957	1.01923	9.15814e-05	9.85094e-05		1.0105	1.02111	0.000110234	2.6633e-05		1.01667	1.03361	0.000277829	1.72429e-05		1.01045
								b3lyp-d3bj-def2-svp	b3lyp-d3bj-def2-tzvp	b3lyp-d4-def2-svp	b3lyp-d4-def2-tzvp	pbe0-d3bj-def2-svp	pbe0-d3bj-def2-tzvp	pbe0-d4-def2-svp	pbe0-d4-def2-tzvp	pbeh-3c	r2scan-3c
8	ethylene oxide	C2H4O	25483.9	0.00224			https://iopscience.iop.org/article/10.1086/305638/meta	25940.3	25668.9	25943.7	25672.8	26342.8	26086.5	26344.2	26088	26555.3	25574.3		1.01791	1.03614	0.000320793	0.000653709		1.00726	1.01457	5.26998e-05	5.69615e-05		1.01804	1.03641	0.000325581	0.000664508		1.00741	1.01488	5.49279e-05	6.03099e-05		1.0337	1.06854	0.00113586	0.00079758		1.02365	1.04785	0.000559119	0.000121971		1.03376
94			22120.8	0.00224				21958.3	22241.2	21953.4	22236	22130.8	22356.9	22129.1	22355.1	22438.7	22217.5		0.992654	0.985362	5.39633e-05	1.46602e-08		1.00544	1.01091	2.96137e-05	3.28232e-05		0.99243	0.984918	5.73014e-05	9.09388e-10		1.0052	1.01043	2.70791e-05	3.08868e-05		1.00045	1.0009	2.0277e-07	2.33783e-05		1.01067	1.02145	0.000113855	3.13874e-06		1.00037
			14097.8	0.00271				14206.9	14192.4	14205.5	14191.1	14396.4	14375.2	14395.9	14374.8	14532.7	14180.6		1.00774	1.01553	5.98642e-05	0.000234632		1.0067	1.01345	4.49556e-05	4.88959e-05		1.00763	1.01533	5.82838e-05	0.000233769		1.00661	1.01327	4.375e-05	4.85628e-05		1.02117	1.0428	0.000448355	0.000248992		1.01967	1.03973	0.000386976	5.06798e-05		1.02114
								b3lyp-d3bj-def2-svp	b3lyp-d3bj-def2-tzvp	b3lyp-d4-def2-svp	b3lyp-d4-def2-tzvp	pbe0-d3bj-def2-svp	pbe0-d3bj-def2-tzvp	pbe0-d4-def2-svp	pbe0-d4-def2-tzvp	pbeh-3c	r2scan-3c
11	acetyl fluoride	CH3COF	11039.3				https://doi.org/10.1063/1.1730542	11012	11006.7	11013.3	11007.7	11127	11133.7	11127.5	11134.2	11180.6	10947.9		0.997531	0.995067	6.09778e-06	2.53448e-05		0.997046	0.994102	8.72376e-06	7.12195e-06		0.997646	0.995298	5.53972e-06	2.73067e-05		0.997144	0.994296	8.15827e-06	6.27639e-06		1.00795	1.01596	6.32115e-05	6.89338e-06		1.00855	1.01718	7.31456e-05	1.49253e-05		1.00799
95			9685.65					9665.92	9690.72	9663.75	9688.45	9760.91	9781.47	9760.26	9780.86	9873.15	9717.73		0.997963	0.99593	4.15056e-06	2.99175e-05		1.00052	1.00105	2.74109e-07	6.55213e-07		0.997739	0.995484	5.11089e-06	2.82941e-05		1.00029	1.00058	8.356e-08	4.111e-07		1.00777	1.0156	6.03697e-05	5.98149e-06		1.00989	1.01988	9.78807e-05	6.44595e-06		1.0077
			5322.05					5318.97	5322.61	5318.59	5322.15	5374.04	5379.67	5373.94	5379.6	5417.45	5316.96		0.99942	0.998841	3.35922e-07	4.81409e-05		1.00011	1.00021	1.1098e-08	1.52979e-07		0.99935	0.9987	4.23013e-07	4.81884e-05		1.00002	1.00004	3.82327e-10	1.38058e-07		1.00977	1.01963	9.54475e-05	1.96699e-05		1.01083	1.02177	0.000117232	2.61299e-06		1.00975
								b3lyp-d3bj-def2-svp	b3lyp-d3bj-def2-tzvp	b3lyp-d4-def2-svp	b3lyp-d4-def2-tzvp	pbe0-d3bj-def2-svp	pbe0-d3bj-def2-tzvp	pbe0-d4-def2-svp	pbe0-d4-def2-tzvp	pbeh-3c	r2scan-3c
13	sulfuric acid	H2SO4	5160.88				https://doi.org/10.1016/j.jms.2013.04.008	4899.61	5073.4	4901.37	5075.24	4987.58	5147.35	4988.57	5148.44	5101.43	4877.97		0.949375	0.901313	0.0025629	0.00189083		0.983049	0.966385	0.000287347	0.000277902		0.949716	0.90196	0.00252853	0.00185497		0.983406	0.967088	0.000275357	0.000263989		0.96642	0.933967	0.00112762	0.00149659		0.997378	0.994764	6.87302e-06	0.000222008		0.966612
96			5024.55				constants from I^r representation	4823.03	4978.3	4822.33	4977.49	4899.38	5049.33	4899.08	5048.95	4957.15	4823.5		0.959892	0.921393	0.00160863	0.00108157		0.990795	0.981674	8.47407e-05	7.96084e-05		0.959753	0.921127	0.00161979	0.00108604		0.990634	0.981356	8.77206e-05	8.13103e-05		0.975087	0.950796	0.000620635	0.000903842		1.00493	1.00989	2.43232e-05	5.53449e-05		0.975028
			4881.02					4647.53	4799.36	4646.49	4798.48	4716.86	4857.9	4716.46	4857.54	4770.44	4596.74		0.952165	0.906617	0.00228823	0.00165429		0.98327	0.966821	0.000279876	0.000270555		0.95195	0.906209	0.00230877	0.00166608		0.983091	0.966467	0.000285931	0.000274348		0.966368	0.933867	0.0011311	0.00150057		0.995263	0.990548	2.24406e-05	0.000288639		0.966285
								b3lyp-d3bj-def2-svp	b3lyp-d3bj-def2-tzvp	b3lyp-d4-def2-svp	b3lyp-d4-def2-tzvp	pbe0-d3bj-def2-svp	pbe0-d3bj-def2-tzvp	pbe0-d4-def2-svp	pbe0-d4-def2-tzvp	pbeh-3c	r2scan-3c
16	chloroaldehyde (trans)	CH2ClCHO	33609.4				https://doi.org/10.1063/1.432775	30337	30045.7	30131	29764.9	32034.7	31890.6	31997.8	31849.7	29738.8	31597.5		0.902633	0.814747	0.00948025	0.00820413		0.893966	0.799175	0.0112433	0.0111892		0.896504	0.80372	0.0107114	0.00934798		0.88561	0.784305	0.0130851	0.0130139		0.953145	0.908486	0.00219537	0.0026926		0.948858	0.900332	0.00261549	0.00394671		0.952047
97			2693.64					2699.49	2723.42	2702.47	2728.17	2715.99	2737.26	2716.65	2737.98	2768.2	2677.89		1.00217	1.00435	4.71047e-06	9.42646e-05		1.01106	1.02223	0.000122233	0.000128705		1.00328	1.00656	1.0736e-05	0.00011878		1.01282	1.0258	0.000164322	0.000173589		1.0083	1.01667	6.88639e-05	8.83013e-06		1.01619	1.03265	0.000262205	1.35634e-05		1.00854
			2549.46					2573.75	2598.43	2577.43	2604.1	2583.28	2604.61	2583.99	2605.44	2637.93	2546.57		1.00953	1.01915	9.07814e-05	0.00029316		1.01921	1.03878	0.000368874	0.000380146		1.01097	1.02206	0.000120373	0.000347895		1.02143	1.04333	0.000459382	0.000474924		1.01327	1.02671	0.000175996	6.26189e-05		1.02163	1.04373	0.000467934	8.19915e-05		1.01354
								b3lyp-d3bj-def2-svp	b3lyp-d3bj-def2-tzvp	b3lyp-d4-def2-svp	b3lyp-d4-def2-tzvp	pbe0-d3bj-def2-svp	pbe0-d3bj-def2-tzvp	pbe0-d4-def2-svp	pbe0-d4-def2-tzvp	pbeh-3c	r2scan-3c
17	Acetyl Chloride	CH3COCl	10162.4				https://doi.org/10.1063/1.1731685	10104.6	10177.3	10105.2	10178.1	10190.7	10252.1	10191	10252.4	10196.9	10136.5		0.994313	0.988658	3.2342e-05	3.21317e-06		1.00147	1.00293	2.14831e-06	3.06908e-06		0.994376	0.988784	3.16245e-05	3.72813e-06		1.00155	1.0031	2.39827e-06	3.61449e-06		1.00279	1.00559	7.78658e-06	6.28672e-06		1.00882	1.01773	7.78557e-05	1.29283e-05		1.00281
98			4946.66					4866.02	4871.81	4863.52	4869.2	4961.21	4980.78	4960.71	4980.25	5021.68	4805.62		0.983698	0.967661	0.000265761	7.92542e-05		0.984868	0.969965	0.000228973	0.000220536		0.983194	0.96667	0.000282455	8.71787e-05		0.98434	0.968926	0.000245222	0.00023449		1.00294	1.00589	8.64887e-06	5.55864e-06		1.0069	1.01384	4.75628e-05	3.02377e-05		1.00284
			3393.07					3353.38	3362.97	3352.27	3361.81	3407.85	3422.91	3407.63	3422.69	3435.58	3327.15		0.988304	0.976745	0.000136797	1.81622e-05		0.991128	0.982334	7.87151e-05	7.37699e-05		0.987976	0.976096	0.000144584	2.04172e-05		0.990788	0.981661	8.48562e-05	7.85524e-05		1.00435	1.00873	1.89654e-05	9.04624e-07		1.00879	1.01766	7.73184e-05	1.31458e-05		1.00429
8-atomics								b3lyp-d3bj-def2-svp	b3lyp-d3bj-def2-tzvp	b3lyp-d4-def2-svp	b3lyp-d4-def2-tzvp	pbe0-d3bj-def2-svp	pbe0-d3bj-def2-tzvp	pbe0-d4-def2-svp	pbe0-d4-def2-tzvp	pbeh-3c	r2scan-3c
3	aziridine	C2H5N	22736.2				https://doi.org/10.1016/j.jms.2010.09.007	23069.6	22989	23070.3	22989.6	23369.6	23274.1	23370.1	23274.6	23529.9	22798.8		1.01467	1.02955	0.000215079	0.00049721		1.01112	1.02237	0.000123681	0.000130191		1.0147	1.02961	0.000215947	0.000501934		1.01114	1.02241	0.000124179	0.000132238		1.02786	1.0565	0.000776158	0.000503078		1.02366	1.04788	0.000559808	0.000122289		1.02788
99			21192.5				S-reduction, I^r representation	21067.4	21320.1	21062	21314.7	21233.8	21433.3	21231.9	21431.4	21423.4	21272.8		0.9941	0.988234	3.48152e-05	2.48844e-06		1.00602	1.01208	3.6257e-05	3.98015e-05		0.993845	0.987729	3.78797e-05	1.94803e-06		1.00577	1.01157	3.32958e-05	3.75069e-05		1.00195	1.00391	3.81085e-06	1.11637e-05		1.01137	1.02286	0.000129204	1.17443e-06		1.00186
			13383.2					13467.8	13496.3	13465	13493.7	13627	13644.7	13626.1	13643.9	13688.8	13450.3		1.00632	1.01268	3.99553e-05	0.000192957		1.00845	1.01698	7.14497e-05	7.64043e-05		1.00612	1.01227	3.74055e-05	0.000189326		1.00826	1.01658	6.81918e-05	7.41793e-05		1.01822	1.03677	0.000331923	0.000164852		1.01954	1.03947	0.000381909	4.88789e-05		1.01815
								b3lyp-d3bj-def2-svp	b3lyp-d3bj-def2-tzvp	b3lyp-d4-def2-svp	b3lyp-d4-def2-tzvp	pbe0-d3bj-def2-svp	pbe0-d3bj-def2-tzvp	pbe0-d4-def2-svp	pbe0-d4-def2-tzvp	pbeh-3c	r2scan-3c
6	urea	NH2CONH2	11233.3				https://doi.org/10.1016/j.jms.2022.111706	11158.6	11224.2	11161.5	11227.1	11251.1	11297.9	11252.5	11298.8	11249.1	11156.1		0.993346	0.986736	4.4276e-05	6.69507e-07		0.999184	0.998368	6.66161e-07	2.81613e-07		0.993607	0.987256	4.08646e-05	1.33637e-06		0.999446	0.998891	3.07421e-07	4.10666e-08		1.00158	1.00316	2.49497e-06	1.37777e-05		1.00575	1.01153	3.30675e-05	4.3969e-05		1.00171
100			10369.4				A-reduction, I^r	10337.1	10375.2	10331.9	10370.1	10431.6	10470.5	10429.5	10468.8	10512.9	10294.7		0.99689	0.99379	9.67206e-06	1.92626e-05		1.00056	1.00112	3.14395e-07	7.16761e-07		0.996389	0.992791	1.30382e-05	1.56725e-05		1.00007	1.00015	5.36177e-09	1.80839e-07		1.006	1.01204	3.60509e-05	4.75386e-07		1.00975	1.0196	9.50701e-05	7.1835e-06		1.0058
			5416.63					5408.13	5433.05	5407.01	5432.01	5453.79	5477.3	5453.38	5476.83	5478.56	5401.94		0.998431	0.996864	2.46217e-06	3.52999e-05		1.00303	1.00607	9.18278e-06	1.1002e-05		0.998224	0.996452	3.1529e-06	3.37328e-05		1.00284	1.00569	8.06082e-06	1.01899e-05		1.00686	1.01377	4.70675e-05	2.37558e-06		1.0112	1.02253	0.000125471	1.55517e-06		1.00678
								b3lyp-d3bj-def2-svp	b3lyp-d3bj-def2-tzvp	b3lyp-d4-def2-svp	b3lyp-d4-def2-tzvp	pbe0-d3bj-def2-svp	pbe0-d3bj-def2-tzvp	pbe0-d4-def2-svp	pbe0-d4-def2-tzvp	pbeh-3c	r2scan-3c
7	methyl formate	CH3OCHO	19985.7				https://doi.org/10.1063/1.1730232	20279.6	20265.9	20291	20276.8	20417.6	20348	20421.1	20351.3	20712.1	19910.5		1.0147	1.02962	0.000216219	0.000498955		1.01402	1.02824	0.000196567	0.000204776		1.01527	1.03078	0.000233267	0.000528367		1.01457	1.02935	0.000212191	0.000222723		1.02161	1.04369	0.000467062	0.000262907		1.01813	1.03659	0.00032866	3.13068e-05		1.02179
101			6914.63					6835.78	6831.39	6828.65	6824.46	6935.69	6958.36	6933.45	6956.21	6841.19	6859.32		0.988597	0.977323	0.000130039	1.57367e-05		0.987962	0.976069	0.000144912	0.000138195		0.987565	0.975284	0.000154633	2.43295e-05		0.986959	0.974089	0.000170059	0.000161118		1.00305	1.0061	9.27611e-06	5.07807e-06		1.00632	1.01269	3.99917e-05	3.67783e-05		1.00272
			5304.47					5284.37	5278.75	5280.91	5275.38	5352.93	5359.75	5351.85	5358.71	5313.62	5272.12		0.99621	0.992434	1.43656e-05	1.37167e-05		0.995151	0.990325	2.35151e-05	2.0838e-05		0.995558	0.991136	1.97302e-05	9.74382e-06		0.994516	0.989061	3.00783e-05	2.6361e-05		1.00914	1.01836	8.34693e-05	1.44769e-05		1.01042	1.02095	0.000108613	4.06865e-06		1.00893
								b3lyp-d3bj-def2-svp	b3lyp-d3bj-def2-tzvp	b3lyp-d4-def2-svp	b3lyp-d4-def2-tzvp	pbe0-d3bj-def2-svp	pbe0-d3bj-def2-tzvp	pbe0-d4-def2-svp	pbe0-d4-def2-tzvp	pbeh-3c	r2scan-3c
8	Acrolein CS trans	CH2CHCHO	47353.7	0.0044			https://doi.org/10.1515/zna-1975-0814	47780	48280.3	47777.3	48276.6	47832.7	48164.1	47830	48160.9	48152.9	47827.5		1.009	1.01809	8.10562e-05	0.000275333		1.01957	1.03952	0.000382888	0.000394375		1.00894	1.01797	8.00078e-05	0.000275885		1.01949	1.03936	0.000379864	0.000393981		1.01012	1.02033	0.000102335	2.28446e-05		1.01711	1.03452	0.000292882	2.10915e-05		1.01006
102			4659.5	0.00019				4623.14	4671.52	4622.31	4670.75	4655.05	4703.5	4654.95	4703.44	4699.71	4670.56		0.992197	0.984455	6.08894e-05	1.15299e-07		1.00258	1.00517	6.65333e-06	8.21332e-06		0.992018	0.984099	6.37148e-05	1.98624e-07		1.00241	1.00483	5.82952e-06	7.6579e-06		0.999045	0.998091	9.11817e-07	3.88488e-05		1.00944	1.01897	8.91586e-05	8.90675e-06		0.999024
			4242.69	0.00019				4215.28	4259.39	4214.56	4258.72	4242.2	4285.04	4242.1	4284.97	4281.8	4255.04		0.993538	0.987119	4.17515e-05	1.02447e-06		1.00394	1.00789	1.54889e-05	1.78292e-05		0.99337	0.986784	4.39573e-05	8.40381e-07		1.00378	1.00757	1.42752e-05	1.707e-05		0.999885	0.99977	1.32224e-08	2.91321e-05		1.00998	1.02006	9.96304e-05	6.01199e-06		0.999861
								b3lyp-d3bj-def2-svp	b3lyp-d3bj-def2-tzvp	b3lyp-d4-def2-svp	b3lyp-d4-def2-tzvp	pbe0-d3bj-def2-svp	pbe0-d3bj-def2-tzvp	pbe0-d4-def2-svp	pbe0-d4-def2-tzvp	pbeh-3c	r2scan-3c
9	Oxazole	C3H3NO	10051	0.02			https://doi.org/10.1515/zna-1978-0207	10063.7	10073.1	10083.2	10093	10182	10195.3	10190.8	10204.2	10255.1	10061.9		1.00127	1.00253	1.60073e-06	7.73877e-05		1.0022	1.00441	4.84279e-06	6.18522e-06		1.0032	1.00642	1.02596e-05	0.00011717		1.00418	1.00837	1.74511e-05	2.05293e-05		1.01304	1.02624	0.000169914	5.90318e-05		1.01436	1.02893	0.000206201	3.50574e-06		1.01391
103			9645.73	0.02				9688.17	9744.26	9689.61	9745.98	9765.21	9804.54	9766.04	9805.55	9872.19	9666.64		1.0044	1.00882	1.93602e-05	0.000142932		1.01022	1.02053	0.000104347	0.000110328		1.00455	1.00912	2.06926e-05	0.000148367		1.01039	1.02089	0.000108023	0.000115542		1.01239	1.02493	0.000153433	4.95383e-05		1.01646	1.0332	0.000271058	1.56073e-05		1.01247
			4919.41	0.02				4936.18	4952.98	4941.24	4958.22	4984.63	4998.05	4986.95	5000.44	5030	4930.16		1.00341	1.00683	1.16271e-05	0.000120074		1.00682	1.01369	4.65622e-05	5.05713e-05		1.00444	1.00889	1.96904e-05	0.000145642		1.00789	1.01584	6.2247e-05	6.7971e-05		1.01326	1.02669	0.000175748	6.24723e-05		1.01599	1.03223	0.000255573	1.21054e-05		1.01373
								b3lyp-d3bj-def2-svp	b3lyp-d3bj-def2-tzvp	b3lyp-d4-def2-svp	b3lyp-d4-def2-tzvp	pbe0-d3bj-def2-svp	pbe0-d3bj-def2-tzvp	pbe0-d4-def2-svp	pbe0-d4-def2-tzvp	pbeh-3c	r2scan-3c
10	Isoxazole	C3H3NO	9786.3	0.006			https://doi.org/10.1016/0301-0104(75)80081-4	9824.43	9872.08	9826.76	9873.78	9922.17	9954.93	9924.2	9956.6	10038.4	9820.75		1.0039	1.00781	1.5186e-05	0.000131069		1.00877	1.01761	7.68291e-05	8.19654e-05		1.00413	1.00829	1.70948e-05	0.000138371		1.00894	1.01796	7.99205e-05	8.63966e-05		1.01388	1.02796	0.000192756	7.27146e-05		1.01723	1.03476	0.000296925	2.21729e-05		1.01409
104			9575.1	0.006				9605.25	9623.81	9613.72	9634.05	9734.5	9760.21	9738.66	9765.26	9821.07	9596.35		1.00315	1.00631	9.91993e-06	0.000114396		1.00509	1.0102	2.58839e-05	2.88888e-05		1.00403	1.00808	1.62724e-05	0.000135995		1.00616	1.01235	3.79109e-05	4.23977e-05		1.01665	1.03357	0.000277143	0.000127162		1.01933	1.03904	0.000373756	4.60256e-05		1.01708
			4836.93	0.005				4856.8	4873.18	4859.54	4876.22	4913.72	4928.3	4915.28	4930	4964.27	4853.63		1.00411	1.00824	1.68868e-05	0.000136016		1.0075	1.01505	5.61797e-05	6.05782e-05		1.00467	1.00937	2.18495e-05	0.000151462		1.00812	1.01631	6.60007e-05	7.18924e-05		1.01588	1.032	0.000252049	0.000110442		1.01889	1.03814	0.000356889	4.03021e-05		1.0162
								b3lyp-d3bj-def2-svp	b3lyp-d3bj-def2-tzvp	b3lyp-d4-def2-svp	b3lyp-d4-def2-tzvp	pbe0-d3bj-def2-svp	pbe0-d3bj-def2-tzvp	pbe0-d4-def2-svp	pbe0-d4-def2-tzvp	pbeh-3c	r2scan-3c
11	1,2-difluoroethane C2 anti	C2H4F2	31699.6		1.05739		https://doi.org/10.1021/jp961567y	32021	31972.9	32010.2	31962.4	32283.8	32237	32279.4	32232.6	32128.6	31699.2		1.01014	1.02038	0.000102765	0.000314562		1.00862	1.01732	7.43437e-05	7.93969e-05		1.0098	1.01969	9.59902e-05	0.000305167		1.00829	1.01665	6.87343e-05	7.47453e-05		1.01843	1.0372	0.000339619	0.000170259		1.01695	1.03419	0.00028739	1.96544e-05		1.01829
105			3879.02		0.12939			3872.96	3855.32	3872.72	3855.09	3917.55	3905.36	3917.59	3905.41	3898.28	3849.64		0.998436	0.996873	2.44761e-06	3.53556e-05		0.993889	0.987815	3.73484e-05	3.39578e-05		0.998375	0.996752	2.64135e-06	3.55163e-05		0.993828	0.987695	3.80886e-05	3.3893e-05		1.00993	1.01996	9.86279e-05	2.112e-05		1.00679	1.01362	4.60861e-05	3.14212e-05		1.00994
			3617.14		0.120655			3615.29	3597.7	3614.93	3597.35	3656.89	3644.48	3656.87	3644.46	3635.28	3590.77		0.999487	0.998974	2.63412e-07	4.9073e-05		0.994625	0.989279	2.88891e-05	2.59147e-05		0.99939	0.99878	3.72572e-07	4.87497e-05		0.994529	0.989089	2.99285e-05	2.62207e-05		1.01099	1.0221	0.000120745	3.1892e-05		1.00756	1.01517	5.71234e-05	2.34798e-05		1.01098
								b3lyp-d3bj-def2-svp	b3lyp-d3bj-def2-tzvp	b3lyp-d4-def2-svp	b3lyp-d4-def2-tzvp	pbe0-d3bj-def2-svp	pbe0-d3bj-def2-tzvp	pbe0-d4-def2-svp	pbe0-d4-def2-tzvp	pbeh-3c	r2scan-3c
12	Ethane, 1,1,2-trifluoro (C1 conformer)	CHF2CH2F	9101.4	0.00052			https://doi.org/10.1006/jmsp.1995.0004	9081.31	9041.6	9082.54	9042.81	9186.34	9159.71	9187.02	9160.36	9151.33	8978.23		0.997793	0.995591	4.8701e-06	2.80781e-05		0.99343	0.986902	4.31708e-05	3.95211e-05		0.997928	0.99586	4.29437e-06	3.03501e-05		0.993562	0.987166	4.14434e-05	3.70627e-05		1.00933	1.01875	8.71118e-05	1.60082e-05		1.00641	1.01286	4.10525e-05	3.57869e-05		1.00941
106			3639.94	0.00023				3632.19	3609.21	3632.6	3609.57	3672.1	3652.71	3672.43	3653.02	3646.65	3608.94		0.997871	0.995746	4.53449e-06	2.89106e-05		0.991558	0.983187	7.12694e-05	6.65658e-05		0.997985	0.995974	4.06e-06	3.09901e-05		0.991658	0.983386	6.95814e-05	6.38798e-05		1.00884	1.01775	7.80976e-05	1.2303e-05		1.00351	1.00703	1.23189e-05	7.82153e-05		1.00893
			2808.14	0.00016				2800.68	2785.63	2800.87	2785.78	2831.82	2819.13	2831.99	2819.28	2814.38	2782.16		0.997341	0.994688	7.07229e-06	2.34539e-05		0.991983	0.98403	6.42711e-05	5.98065e-05		0.997409	0.994825	6.71378e-06	2.48636e-05		0.992035	0.984133	6.34456e-05	5.80046e-05		1.00843	1.01693	7.1088e-05	9.63351e-06		1.00391	1.00784	1.53091e-05	7.13356e-05		1.00849
								b3lyp-d3bj-def2-svp	b3lyp-d3bj-def2-tzvp	b3lyp-d4-def2-svp	b3lyp-d4-def2-tzvp	pbe0-d3bj-def2-svp	pbe0-d3bj-def2-tzvp	pbe0-d4-def2-svp	pbe0-d4-def2-tzvp	pbeh-3c	r2scan-3c
14	1,1,2,2-tetrafluoroethane C2H conformer	CHF2CHF2	5135.12		0.171289	8.3e-07	https://doi.org/10.1021/jp010539z	5106.25	5091.81	5106.09	5091.66	5164.56	5158.21	5164.53	5158.17	5145.24	5060.09		0.994376	0.988784	3.16279e-05	3.44524e-06		0.991566	0.983203	7.11359e-05	6.64368e-05		0.994346	0.988723	3.19725e-05	3.60901e-06		0.991536	0.983143	7.16475e-05	6.58608e-05		1.00573	1.0115	3.2867e-05	1.76105e-07		1.0045	1.00901	2.02059e-05	6.19494e-05		1.00573
107			3148.49		0.105022	1.1e-06		3147.37	3120.21	3146.97	3119.8	3180.19	3153.4	3180.11	3153.32	3155.28	3119.85		0.999645	0.999289	1.26365e-07	5.13251e-05		0.991018	0.982117	8.06771e-05	7.56702e-05		0.999515	0.99903	2.35263e-07	5.05293e-05		0.990887	0.981858	8.30382e-05	7.6803e-05		1.01007	1.02024	0.000101376	2.23949e-05		1.00156	1.00312	2.42696e-06	0.000116033		1.01004
			2067.3		0.0689579	2.7e-07		2060.53	2046.97	2060.37	2046.81	2083.17	2071.01	2083.15	2070.99	2070.3	2043.75		0.996721	0.993452	1.07535e-05	1.77948e-05		0.990162	0.98042	9.67937e-05	9.13065e-05		0.996646	0.993304	1.12475e-05	1.77908e-05		0.990086	0.98027	9.82872e-05	9.14983e-05		1.00768	1.01541	5.8921e-05	5.53383e-06		1.00179	1.00359	3.21455e-06	0.000111086		1.00766
								b3lyp-d3bj-def2-svp	b3lyp-d3bj-def2-tzvp	b3lyp-d4-def2-svp	b3lyp-d4-def2-tzvp	pbe0-d3bj-def2-svp	pbe0-d3bj-def2-tzvp	pbe0-d4-def2-svp	pbe0-d4-def2-tzvp	pbeh-3c	r2scan-3c
15	pentafluoroethane	CF3CHF2	3691.05	0.0013			https://doi.org/10.1016/j.molstruc.2004.07.014	3667.75	3657.86	3667.86	3657.96	3710.27	3704.14	3710.33	3704.19	3702.89	3633.06		0.993687	0.987414	3.98533e-05	1.34996e-06		0.991008	0.982097	8.08592e-05	7.58466e-05		0.993716	0.987472	3.94846e-05	1.60202e-06		0.991036	0.982152	8.0357e-05	7.42244e-05		1.00521	1.01044	2.71226e-05	1.05294e-08		1.00355	1.0071	1.2572e-05	7.75898e-05		1.00522
108			2419.68	0.0015				2410.22	2391.98	2410.27	2392.02	2437.09	2418.08	2437.17	2418.15	2419.74	2387.36		0.996087	0.99219	1.53083e-05	1.28185e-05		0.988549	0.97723	0.000131119	0.00012473		0.996108	0.992231	1.51495e-05	1.35079e-05		0.988567	0.977265	0.000130709	0.000122873		1.0072	1.01444	5.17711e-05	3.5125e-06		0.999337	0.998675	4.39444e-07	0.000168099		1.00723
			2005.86	0.0015				1995.98	1982.77	1995.99	1982.77	2018.29	2005.39	2018.33	2005.43	2005.37	1978.11		0.995076	0.990176	2.42466e-05	6.55969e-06		0.988491	0.977114	0.00013246	0.000126038		0.995078	0.99018	2.42294e-05	6.95584e-06		0.988491	0.977114	0.000132462	0.000124574		1.0062	1.01244	3.84279e-05	7.80112e-07		0.999766	0.999532	5.48732e-08	0.0001573		1.00622
								b3lyp-d3bj-def2-svp	b3lyp-d3bj-def2-tzvp	b3lyp-d4-def2-svp	b3lyp-d4-def2-tzvp	pbe0-d3bj-def2-svp	pbe0-d3bj-def2-tzvp	pbe0-d4-def2-svp	pbe0-d4-def2-tzvp	pbeh-3c	r2scan-3c
21	Ethane, 1,1-dichloro-	CH3CHCl2	6431.55	0.024			https://doi.org/10.1016/S0022-2860(97)00166-X	6404.71	6410.78	6396.61	6402.61	6483.11	6500.2	6480.33	6497.41	6488.94	6377.41		0.995828	0.991673	1.74057e-05	1.10152e-05		0.996771	0.993551	1.04297e-05	8.6711e-06		0.994568	0.989165	2.95071e-05	4.51058e-06		0.9955	0.991021	2.02475e-05	1.72168e-05		1.00802	1.0161	6.4268e-05	7.24332e-06		1.01067	1.02146	0.000113936	3.12546e-06		1.00759
109			3216.11	0.015				3118.95	3150.2	3119.5	3150.83	3183.15	3215.97	3184	3216.87	3220.16	3115.1		0.969791	0.940495	0.000912561	0.000525031		0.979505	0.959431	0.000420026	0.000408632		0.969963	0.940828	0.000902242	0.000513857		0.979701	0.959815	0.000412037	0.000398156		0.989753	0.979611	0.000104999	0.0002395		0.999959	0.999917	1.72048e-09	0.00015256		0.990016
			2273.41	0.012				2222.57	2237.59	2221.82	2236.85	2263.73	2280.91	2263.83	2281.02	2284.51	2218.66		0.977636	0.955773	0.000500133	0.000225287		0.98424	0.968729	0.00024837	0.000239584		0.977305	0.955124	0.000515083	0.000233196		0.983916	0.968091	0.000258696	0.000247675		0.995742	0.991502	1.81331e-05	9.06084e-05		1.0033	1.00661	1.08785e-05	8.1955e-05		0.995782
								b3lyp-d3bj-def2-svp	b3lyp-d3bj-def2-tzvp	b3lyp-d4-def2-svp	b3lyp-d4-def2-tzvp	pbe0-d3bj-def2-svp	pbe0-d3bj-def2-tzvp	pbe0-d4-def2-svp	pbe0-d4-def2-tzvp	pbeh-3c	r2scan-3c
27	Ethyl bromide	C2H5Br	29956.2				https://doi.org/10.1063/1.1733627	30113.1	30272.1	30131.5	30275.9	30404.8	30470.6	30407.9	30473.8	30324.1	30044.5		1.00524	1.0105	2.74447e-05	0.000163852		1.01055	1.02121	0.000111262	0.000117437		1.00585	1.01174	3.42749e-05	0.000182144		1.01068	1.02146	0.000113966	0.000121689		1.01498	1.03017	0.000224258	9.24114e-05		1.01717	1.03464	0.000294883	2.16243e-05		1.01508
			3803.89					3721.01	3732.09	3716.45	3728.47	3791.29	3811.92	3790.3	3810.94	3774.68	3724.37		0.978212	0.956898	0.000474726	0.000208219		0.981124	0.962603	0.00035632	0.000345815		0.977012	0.954553	0.000528426	0.00024227		0.980173	0.960739	0.000393111	0.000379548		0.996689	0.993389	1.09637e-05	7.35597e-05		1.00211	1.00423	4.45589e-06	0.000104564		0.996428
			3522.93					3457.23	3466.59	3453.52	3463.52	3521.26	3538.01	3520.44	3537.2	3503.04	3458.14		0.98135	0.963047	0.000347833	0.000126974		0.984008	0.968272	0.000255741	0.000246827		0.980298	0.960984	0.000388174	0.000150178		0.983137	0.966558	0.000284375	0.000272823		0.999526	0.999053	2.2447e-07	3.31122e-05		1.00428	1.00858	1.83182e-05	6.53392e-05		0.999294
9-atomics								b3lyp-d3bj-def2-svp	b3lyp-d3bj-def2-tzvp	b3lyp-d4-def2-svp	b3lyp-d4-def2-tzvp	pbe0-d3bj-def2-svp	pbe0-d3bj-def2-tzvp	pbe0-d4-def2-svp	pbe0-d4-def2-tzvp	pbeh-3c	r2scan-3c
2	Propene	CH2CHCH3	46281.1	0.0055			https://doi.org/10.1006/jmsp.1994.1231	46587.1	47126	46601.3	47140.5	46768.3	47145.2	46773.7	47150.8	47278.5	46800		1.00661	1.01327	4.37157e-05	0.000201181		1.01825	1.03684	0.000333232	0.00034394		1.00692	1.01388	4.78576e-05	0.000212215		1.01857	1.03748	0.000344773	0.000358217		1.01053	1.02116	0.000110796	2.69082e-05		1.01867	1.03769	0.000348589	3.75786e-05		1.01064
110			9308.34	0.0011			Global fit (not fit of A lines)	9215.27	9328.84	9209.49	9322.94	9272.13	9382.84	9270.01	9380.64	9351.71	9333.72		0.990002	0.980104	9.99593e-05	6.5069e-06		1.0022	1.00441	4.85357e-06	6.19741e-06		0.989381	0.978875	0.000112759	9.62469e-06		1.00157	1.00314	2.46092e-06	3.69134e-06		0.99611	0.992236	1.51299e-05	8.37629e-05		1.008	1.01607	6.4062e-05	1.94059e-05		0.995883
			8130.27	0.0012				8080.95	8178.37	8076.86	8174.21	8129.09	8220.41	8127.58	8218.85	8198.78	8174.14		0.993933	0.987902	3.68107e-05	1.98666e-06		1.00592	1.01187	3.4999e-05	3.84826e-05		0.99343	0.986903	4.31669e-05	9.54633e-07		1.0054	1.01084	2.91957e-05	3.31455e-05		0.999854	0.999708	2.13386e-08	2.94669e-05		1.01109	1.0223	0.000122902	1.85206e-06		0.999669
								b3lyp-d3bj-def2-svp	b3lyp-d3bj-def2-tzvp	b3lyp-d4-def2-svp	b3lyp-d4-def2-tzvp	pbe0-d3bj-def2-svp	pbe0-d3bj-def2-tzvp	pbe0-d4-def2-svp	pbe0-d4-def2-tzvp	pbeh-3c	r2scan-3c
3	ethyl cyanide	C2H5CN	27663.3				https://doi.org/10.1063/1.1730643	27876.1	27996.3	27883.8	28004.4	28143.3	28124.6	28146.6	28128.3	28114.8	27788.6		1.00769	1.01545	5.92023e-05	0.00023331		1.01204	1.02422	0.000144906	0.000151952		1.00797	1.016	6.35168e-05	0.000244216		1.01233	1.02481	0.000152007	0.000160921		1.01735	1.035	0.000301064	0.000143437		1.01668	1.03363	0.000278122	1.73151e-05		1.01747
111			4714.14					4659.55	4719.34	4656.46	4716.17	4688.44	4750.92	4687.39	4749.82	4745.02	4727.78		0.988419	0.976972	0.000134121	1.71881e-05		1.0011	1.00221	1.21684e-06	1.92979e-06		0.987764	0.975678	0.000149717	2.23894e-05		1.00043	1.00086	1.85602e-07	6.13039e-07		0.994548	0.989127	2.97189e-05	0.000114613		1.0078	1.01566	6.08633e-05	2.1207e-05		0.994325
			4235.14					4202.8	4250.74	4200.44	4248.34	4231.77	4279.44	4230.98	4278.62	4273.13	4254.29		0.992364	0.984786	5.83115e-05	2.93541e-08		1.00368	1.00738	1.35727e-05	1.57682e-05		0.991807	0.98368	6.71319e-05	4.33659e-07		1.00312	1.00624	9.71236e-06	1.20379e-05		0.999205	0.99841	6.32321e-07	3.68937e-05		1.01046	1.02103	0.000109408	3.91837e-06		0.999017
								b3lyp-d3bj-def2-svp	b3lyp-d3bj-def2-tzvp	b3lyp-d4-def2-svp	b3lyp-d4-def2-tzvp	pbe0-d3bj-def2-svp	pbe0-d3bj-def2-tzvp	pbe0-d4-def2-svp	pbe0-d4-def2-tzvp	pbeh-3c	r2scan-3c
4	1H-Imidazole	C3H4N2	9725.33	0.012			https://doi.org/10.1515/zna-1981-1220	9721.46	9760.34	9739.99	9779.74	9818.58	9855.66	9827.97	9865.3	9910.56	9744.3		0.999602	0.999205	1.58223e-07	5.07164e-05		1.0036	1.00721	1.29597e-05	1.51067e-05		1.00151	1.00302	2.27439e-06	8.3114e-05		1.0056	1.01122	3.13047e-05	3.5391e-05		1.00959	1.01927	9.19496e-05	1.81079e-05		1.0134	1.02698	0.000179587	8.56501e-07		1.01055
112			9374.01	0.012				9364.91	9458.16	9365.58	9459.28	9433.34	9511.18	9433.83	9511.83	9542.56	9401.09		0.999029	0.99806	9.41968e-07	4.28299e-05		1.00898	1.01803	8.05743e-05	8.58334e-05		0.999101	0.998203	8.08471e-07	4.47714e-05		1.0091	1.01827	8.27376e-05	8.93256e-05		1.00633	1.0127	4.00613e-05	1.02601e-06		1.01463	1.02948	0.000214128	4.58992e-06		1.00638
			4771.93	0.012				4769.93	4803.44	4774.56	4808.42	4811.05	4840.18	4813.43	4842.67	4861.54	4784.81		0.999581	0.999162	1.75738e-07	5.04092e-05		1.0066	1.01325	4.35943e-05	4.74754e-05		1.00055	1.0011	3.04101e-07	6.64676e-05		1.00765	1.01535	5.84794e-05	6.403e-05		1.0082	1.01647	6.72275e-05	8.25346e-06		1.0143	1.02881	0.000204556	3.29666e-06		1.0087
								b3lyp-d3bj-def2-svp	b3lyp-d3bj-def2-tzvp	b3lyp-d4-def2-svp	b3lyp-d4-def2-tzvp	pbe0-d3bj-def2-svp	pbe0-d3bj-def2-tzvp	pbe0-d4-def2-svp	pbe0-d4-def2-tzvp	pbeh-3c	r2scan-3c
5	1H-Pyrazole	C3H4N2	9618.7	0.013			https://doi.org/10.1016/0022-2860(74)85010-6	9612.64	9672.3	9621.88	9680	9700	9760	9708.38	9761.04	9810.68	9653.03		0.99937	0.99874	3.96904e-07	4.74386e-05		1.00557	1.01118	3.10556e-05	3.43407e-05		1.00033	1.00066	1.09514e-07	6.28939e-05		1.00637	1.01279	4.06152e-05	4.52559e-05		1.00845	1.01698	7.14411e-05	9.7631e-06		1.01469	1.0296	0.0002158	4.83442e-06		1.00932
113			9412.5	0.013				9410.47	9488.7	9413.65	9490	9490	9560	9494.74	9562.61	9593.9	9448.73		0.999784	0.999568	4.66704e-08	5.33579e-05		1.0081	1.01626	6.55338e-05	7.02806e-05		1.00012	1.00024	1.49487e-08	5.96033e-05		1.00823	1.01654	6.77943e-05	7.37646e-05		1.00823	1.01654	6.77943e-05	8.45179e-06		1.01567	1.03159	0.000245569	1.0031e-05		1.00874
			4755.8	0.013				4755.24	4789.81	4758.31	4790	4800	4830	4800.19	4830.4	4850.54	4774.9		0.999882	0.999764	1.38863e-08	5.4813e-05		1.00715	1.01435	5.1141e-05	5.53399e-05		1.00053	1.00106	2.7945e-07	6.60932e-05		1.00719	1.01443	5.17136e-05	5.69384e-05		1.00929	1.01867	8.63769e-05	1.56957e-05		1.0156	1.03145	0.000243422	9.60611e-06		1.00933
								b3lyp-d3bj-def2-svp	b3lyp-d3bj-def2-tzvp	b3lyp-d4-def2-svp	b3lyp-d4-def2-tzvp	pbe0-d3bj-def2-svp	pbe0-d3bj-def2-tzvp	pbe0-d4-def2-svp	pbe0-d4-def2-tzvp	pbeh-3c	r2scan-3c
7	Dimethyl ether	CH3OCH3	38788.2	0.025			https://doi.org/10.1016/S0022-2852(03)00076-6	39673.9	39413.9	39721.6	39458.9	39949.1	39447.4	39967.7	39464.8	39939.2	38675.1		1.02284	1.04619	0.000521454	0.000932048		1.01613	1.03252	0.000260217	0.000269669		1.02407	1.04871	0.000579169	0.00101416		1.01729	1.03488	0.000299008	0.00031152		1.02993	1.06075	0.000895742	0.000599652		1.017	1.03428	0.000288892	2.00437e-05		1.03041
114			10056.5	0.006				10003.6	10009	9990.05	9995.67	10128.8	10186	10123.5	10180.8	10125.3	10016.8		0.994739	0.989505	2.7683e-05	4.93404e-06		0.995277	0.990576	2.23104e-05	1.97046e-05		0.993391	0.986827	4.36728e-05	8.80555e-07		0.99395	0.987937	3.6601e-05	3.249e-05		1.00719	1.01443	5.16558e-05	3.48265e-06		1.01287	1.02591	0.000165723	1.63476e-07		1.00666
			8886.8	0.005				8900.26	8879.09	8892.09	8871.03	9011.22	9019.84	9008.05	9016.71	8987.22	8855.19		1.00151	1.00303	2.29117e-06	8.18547e-05		0.999132	0.998266	7.52755e-07	3.38857e-07		1.00059	1.00119	3.53856e-07	6.71826e-05		0.998225	0.996453	3.1517e-06	2.02757e-06		1.014	1.0282	0.000196002	7.4703e-05		1.01497	1.03016	0.000224087	6.12407e-06		1.01364
								b3lyp-d3bj-def2-svp	b3lyp-d3bj-def2-tzvp	b3lyp-d4-def2-svp	b3lyp-d4-def2-tzvp	pbe0-d3bj-def2-svp	pbe0-d3bj-def2-tzvp	pbe0-d4-def2-svp	pbe0-d4-def2-tzvp	pbeh-3c	r2scan-3c
8	Ethanol	CH3CH2OH	34015.8				https://doi.org/10.1063/1.439723	34306	34443.2	34315.7	34462.4	34594.7	34673.3	34598	34676.5	34985.1	34243.9		1.00853	1.01713	7.2772e-05	0.000259762		1.01256	1.02529	0.000157853	0.000165207		1.00881	1.01771	7.76995e-05	0.000271552		1.01313	1.02643	0.000172346	0.000181837		1.01702	1.03433	0.00028965	0.000135633		1.01933	1.03903	0.000373568	4.59602e-05		1.01711
115	gauche		9188.64					9195.88	9189.58	9188.6	9180.12	9288.05	9292.04	9285.66	9289.58	9224.45	9166.44		1.00079	1.00158	6.21732e-07	6.91682e-05		1.0001	1.00021	1.05822e-08	1.51047e-07		0.999996	0.999991	0	5.76483e-05		0.999073	0.998148	8.58545e-07	3.30512e-07		1.01082	1.02175	0.000117047	3.00152e-05		1.01125	1.02263	0.000126649	1.42861e-06		1.01056
			8099.98					8124.65	8109.89	8120.8	8107.35	8205.92	8198.94	8204.68	8197.71	8165.59	8091.35		1.00305	1.0061	9.27381e-06	0.000112159		1.00122	1.00245	1.49679e-06	2.27868e-06		1.00257	1.00515	6.60788e-06	0.00010378		1.00091	1.00182	8.26541e-07	1.59129e-06		1.01308	1.02633	0.000171053	5.97003e-05		1.01222	1.02458	0.000149253	5.95527e-08		1.01293
								b3lyp-d3bj-def2-svp	b3lyp-d3bj-def2-tzvp	b3lyp-d4-def2-svp	b3lyp-d4-def2-tzvp	pbe0-d3bj-def2-svp	pbe0-d3bj-def2-tzvp	pbe0-d4-def2-svp	pbe0-d4-def2-tzvp	pbeh-3c	r2scan-3c
9	Furan	C4H4O	9447.12	0.00014			https://doi.org/10.1021/acsearthspacechem.1c00182	9445.19	9481.23	9459.48	9496.85	9541.13	9578.65	9549.12	9587.19	9610.39	9469.95		0.999795	0.99959	4.20328e-08	5.35202e-05		1.00361	1.00723	1.30301e-05	1.51828e-05		1.00131	1.00262	1.7094e-06	7.94682e-05		1.00526	1.01055	2.77039e-05	3.15541e-05		1.00995	1.02	9.90099e-05	2.12961e-05		1.01392	1.02804	0.000193825	2.07402e-06		1.0108
116			9246.74	0.00014				9248.32	9327.35	9249.33	9328.71	9311.42	9377.23	9312.04	9377.93	9423.08	9288.62		1.00017	1.00034	2.88812e-08	5.91904e-05		1.00872	1.01751	7.59804e-05	8.10885e-05		1.00028	1.00056	7.84181e-08	6.20831e-05		1.00886	1.01781	7.85736e-05	8.49955e-05		1.00699	1.01404	4.89263e-05	2.80477e-06		1.01411	1.02842	0.00019912	2.64618e-06		1.00706
			4670.83	0.00014				4672.86	4701.83	4676.61	4706.01	4712.44	4738.43	4714.55	4740.7	4757.91	4689.2		1.00043	1.00087	1.89127e-07	6.3369e-05		1.00664	1.01332	4.40543e-05	4.79554e-05		1.00124	1.00248	1.53457e-06	7.82395e-05		1.00753	1.01512	5.67542e-05	6.22236e-05		1.00891	1.0179	7.93669e-05	1.28071e-05		1.01447	1.02916	0.000209506	3.94247e-06		1.00936
								b3lyp-d3bj-def2-svp	b3lyp-d3bj-def2-tzvp	b3lyp-d4-def2-svp	b3lyp-d4-def2-tzvp	pbe0-d3bj-def2-svp	pbe0-d3bj-def2-tzvp	pbe0-d4-def2-svp	pbe0-d4-def2-tzvp	pbeh-3c	r2scan-3c
10	β–Propiolactone	C3H4O2	12406	0.2			https://doi.org/10.1063/1.1696902	12449.3	12493.9	12446	12490.7	12568.7	12595.5	12567.2	12594.1	12654.1	12438.3		1.00349	1.007	1.21932e-05	0.000121892		1.00708	1.01421	5.01496e-05	5.43082e-05		1.00322	1.00645	1.03781e-05	0.000117573		1.00683	1.0137	4.66287e-05	5.15944e-05		1.01312	1.02641	0.000172064	6.02949e-05		1.01528	1.03079	0.000233368	7.71597e-06		1.013
117			5244.53	0.2				5234.45	5240.6	5239.36	5245.55	5298.44	5301.76	5301.03	5304.37	5323.1	5223.29		0.998078	0.99616	3.69318e-06	3.12044e-05		0.999251	0.998504	5.60287e-07	2.14359e-07		0.999015	0.99803	9.71043e-07	4.36158e-05		1.00019	1.00039	3.74621e-08	2.97702e-07		1.01028	1.02066	0.000105663	2.44225e-05		1.01091	1.02195	0.000119099	2.34599e-06		1.01077
			3869.18	0.2				3869.73	3874.36	3872.03	3876.7	3915.75	3917.77	3916.99	3919.03	3933.34	3861.3		1.00014	1.00028	2.0162e-08	5.87579e-05		1.00134	1.00268	1.79263e-06	2.6407e-06		1.00074	1.00147	5.43256e-07	6.9552e-05		1.00194	1.00389	3.78169e-06	5.27778e-06		1.01204	1.02422	0.000144881	4.47567e-05		1.01256	1.02527	0.000157705	8.62858e-09		1.01236
								b3lyp-d3bj-def2-svp	b3lyp-d3bj-def2-tzvp	b3lyp-d4-def2-svp	b3lyp-d4-def2-tzvp	pbe0-d3bj-def2-svp	pbe0-d3bj-def2-tzvp	pbe0-d4-def2-svp	pbe0-d4-def2-tzvp	pbeh-3c	r2scan-3c
11	Maleic Anhydride	C4H2O3	6842.49	0.003			https://doi.org/10.1016/0584-8539(85)80227-0	6841.18	6886.38	6842.72	6888.24	6887.5	6920.63	6888.7	6921.98	6936.84	6881.98		0.999809	0.999618	3.64229e-08	5.37293e-05		1.00641	1.01287	4.115e-05	4.49223e-05		1.00003	1.00007	1.14622e-09	5.82358e-05		1.00669	1.01342	4.4715e-05	4.95797e-05		1.00658	1.0132	4.32676e-05	1.58766e-06		1.01142	1.02297	0.000130402	1.06451e-06		1.00675
118			2467.61	0.001				2458.53	2468.14	2460.14	2469.91	2484.79	2495.69	2485.76	2496.76	2508.1	2455.51		0.99632	0.992653	1.35453e-05	1.45483e-05		1.00022	1.00043	4.62468e-08	2.50861e-07		0.996972	0.993953	9.16801e-06	2.06684e-05		1.00093	1.00186	8.65685e-07	1.64545e-06		1.00696	1.01397	4.84514e-05	2.69254e-06		1.01138	1.02288	0.000129426	1.15356e-06		1.00735
			1813.63	0.001				1808.58	1816.94	1809.56	1818.02	1826.02	1834.23	1826.63	1834.91	1842.08	1809.78		0.997216	0.99444	7.75044e-06	2.22539e-05		1.00182	1.00365	3.32922e-06	4.45584e-06		0.997756	0.995516	5.03687e-06	2.84705e-05		1.00242	1.00485	5.87342e-06	7.70822e-06		1.00683	1.01371	4.66886e-05	2.29151e-06		1.01136	1.02285	0.000129084	1.18569e-06		1.00717
								b3lyp-d3bj-def2-svp	b3lyp-d3bj-def2-tzvp	b3lyp-d4-def2-svp	b3lyp-d4-def2-tzvp	pbe0-d3bj-def2-svp	pbe0-d3bj-def2-tzvp	pbe0-d4-def2-svp	pbe0-d4-def2-tzvp	pbeh-3c	r2scan-3c
12	Allyl Fluoride	CH2CHCH2F	17236.6				https://doi.org/10.1063/1.1696249	17270	17380.4	17269.6	17380	17391.7	17510	17391.5	17509.8	17519.2	17294.1		1.00194	1.00388	3.75694e-06	8.97789e-05		1.00834	1.01675	6.95595e-05	7.44487e-05		1.00191	1.00382	3.64816e-06	9.06618e-05		1.00832	1.0167	6.91723e-05	7.52021e-05		1.009	1.01807	8.09382e-05	1.34396e-05		1.01586	1.03197	0.000251552	1.12532e-05		1.00898
119	cis		6002.91					5999.61	5978.75	5997.2	5976.31	6060.9	6043.07	6060.07	6042.27	6014.69	5982.94		0.999451	0.998902	3.01666e-07	4.85661e-05		0.995975	0.991966	1.62029e-05	1.39928e-05		0.999048	0.998098	9.0556e-07	4.40668e-05		0.99557	0.991159	1.96291e-05	1.66467e-05		1.00966	1.01941	9.33062e-05	1.87095e-05		1.00669	1.01342	4.47502e-05	3.25282e-05		1.00952
			4579.82					4581.82	4576.09	4580.36	4574.62	4625.74	4622.62	4625.23	4622.13	4605.42	4573.62		1.00044	1.00087	1.90675e-07	6.33975e-05		0.999186	0.998372	6.62991e-07	2.79552e-07		1.00012	1.00023	1.37542e-08	5.95257e-05		0.998864	0.99773	1.29005e-06	6.14972e-07		1.01003	1.02015	0.000100527	2.19988e-05		1.00935	1.01878	8.73536e-05	9.4821e-06		1.00992
								b3lyp-d3bj-def2-svp	b3lyp-d3bj-def2-tzvp	b3lyp-d4-def2-svp	b3lyp-d4-def2-tzvp	pbe0-d3bj-def2-svp	pbe0-d3bj-def2-tzvp	pbe0-d4-def2-svp	pbe0-d4-def2-tzvp	pbeh-3c	r2scan-3c
13	2-fluoropropene	CH2CFCH3	10169.4				https://doi.org/10.1016/0022-2852(59)90046-3	10141.4	10184.9	10144.5	10188	10230.3	10273.4	10231.6	10274.8	10216.6	10142.3		0.997244	0.994495	7.59634e-06	2.25191e-05		1.00153	1.00306	2.33099e-06	3.28676e-06		0.997551	0.995107	5.99884e-06	2.63093e-05		1.00182	1.00365	3.32939e-06	4.74066e-06		1.00599	1.01201	3.58269e-05	4.50103e-07		1.01023	1.02056	0.000104617	4.87636e-06		1.00612
120			9041.36					9029.31	9079.23	9023.96	9073.96	9096.75	9147.79	9094.73	9145.79	9143.79	9079.59		0.998667	0.997336	1.77639e-06	3.81859e-05		1.00419	1.00839	1.75402e-05	2.0026e-05		0.998076	0.996155	3.70279e-06	3.20157e-05		1.00361	1.00722	1.3001e-05	1.56734e-05		1.00613	1.01229	3.75346e-05	6.57959e-07		1.01177	1.02368	0.000138579	4.67187e-07		1.0059
			4926.16					4924.14	4947.25	4923.27	4946.38	4964.89	4988.58	4964.59	4988.29	4973.05	4938.09		0.999591	0.999182	1.67443e-07	5.05526e-05		1.00428	1.00858	1.83228e-05	2.0862e-05		0.999412	0.998825	3.45199e-07	4.90718e-05		1.0041	1.00822	1.68409e-05	1.98668e-05		1.00786	1.01578	6.18017e-05	6.43554e-06		1.01267	1.0255	0.000160543	4.16226e-08		1.0078
								b3lyp-d3bj-def2-svp	b3lyp-d3bj-def2-tzvp	b3lyp-d4-def2-svp	b3lyp-d4-def2-tzvp	pbe0-d3bj-def2-svp	pbe0-d3bj-def2-tzvp	pbe0-d4-def2-svp	pbe0-d4-def2-tzvp	pbeh-3c	r2scan-3c
14	hexafluoropropene	C3F6	2557.88	0.12			https://doi.org/10.1063/1.1679956	2544.52	2543.58	2544.58	2543.67	2572.49	2572.4	2572.58	2572.44	2571.84	2531.46		0.994776	0.98958	2.72878e-05	5.10419e-06		0.994409	0.988849	3.12623e-05	2.81655e-05		0.994799	0.989625	2.7053e-05	5.55241e-06		0.994446	0.988924	3.08419e-05	2.70764e-05		1.00571	1.01145	3.26078e-05	1.57704e-07		1.00568	1.01138	3.22089e-05	4.49588e-05		1.00575
121			1255.03	0.006				1250.3	1248.38	1250.47	1248.66	1261.38	1260.13	1261.5	1260.35	1262.27	1246.17		0.996232	0.992477	1.42013e-05	1.38793e-05		0.994699	0.989427	2.80955e-05	2.51631e-05		0.996364	0.992741	1.32207e-05	1.54722e-05		0.994922	0.989871	2.57818e-05	2.23479e-05		1.00505	1.01013	2.55456e-05	6.52648e-08		1.00406	1.00814	1.64776e-05	6.8911e-05		1.00516
			987.082	0.007				982.819	982.219	982.936	982.41	991.806	991.521	991.9	991.666	992.248	980.048		0.995681	0.99138	1.86553e-05	1.0053e-05		0.995073	0.990171	2.42712e-05	2.15504e-05		0.9958	0.991617	1.76435e-05	1.13219e-05		0.995266	0.990555	2.24073e-05	1.92134e-05		1.00479	1.00959	2.29009e-05	2.73354e-07		1.0045	1.00902	2.02272e-05	6.19126e-05		1.00488
								b3lyp-d3bj-def2-svp	b3lyp-d3bj-def2-tzvp	b3lyp-d4-def2-svp	b3lyp-d4-def2-tzvp	pbe0-d3bj-def2-svp	pbe0-d3bj-def2-tzvp	pbe0-d4-def2-svp	pbe0-d4-def2-tzvp	pbeh-3c	r2scan-3c
15	Dimethyl sulfide	CH3SCH3	17809.8				https://doi.org/10.1063/1.1731956	17574	17790.2	17606.1	17823.8	17910.6	18042.4	17924	18056.3	17886.7	17353.7		0.986759	0.973693	0.000175328	3.38544e-05		0.9989	0.997801	1.2098e-06	6.63368e-07		0.988563	0.977258	0.000130794	1.54157e-05		1.00078	1.00157	6.15619e-07	1.29252e-06		1.00566	1.01135	3.20484e-05	1.21236e-07		1.01306	1.02628	0.00017049	3.43275e-07		1.00641
122			7621.03					7465.65	7535.2	7448.86	7517.81	7551.76	7653.36	7545.48	7646.79	7590.7	7485.22		0.979611	0.959638	0.000415703	0.000169517		0.988738	0.977602	0.00012684	0.000120556		0.977408	0.955326	0.0005104	0.000230024		0.986456	0.973096	0.000183432	0.000174147		0.990911	0.981904	8.26136e-05	0.000205183		1.00424	1.0085	1.7996e-05	6.59444e-05		0.990087
			5717.79					5619.73	5674.34	5613.53	5667.92	5702.56	5767.75	5700.34	5765.45	5712.86	5604.55		0.98285	0.965995	0.00029411	9.5186e-05		0.992401	0.98486	5.77467e-05	5.35172e-05		0.981766	0.963865	0.000332471	0.000116105		0.991278	0.982632	7.60726e-05	7.01076e-05		0.997336	0.994678	7.09901e-06	6.29382e-05		1.00874	1.01755	7.63474e-05	1.35456e-05		0.996949
								b3lyp-d3bj-def2-svp	b3lyp-d3bj-def2-tzvp	b3lyp-d4-def2-svp	b3lyp-d4-def2-tzvp	pbe0-d3bj-def2-svp	pbe0-d3bj-def2-tzvp	pbe0-d4-def2-svp	pbe0-d4-def2-tzvp	pbeh-3c	r2scan-3c
16	Thiophene	C4H4S	8041.77				https://doi.org/10.1063/1.1743138	7971.67	8066	7973.04	8068.05	8046.73	8132.38	8047.68	8133.55	8118.79	8009.39		0.991283	0.982642	7.5983e-05	1.58781e-06		1.00301	1.00603	9.07633e-06	1.08854e-05		0.991453	0.982979	7.30541e-05	1.03019e-06		1.00327	1.00655	1.0677e-05	1.31096e-05		1.00062	1.00123	3.80065e-07	2.1807e-05		1.01127	1.02266	0.00012695	1.39725e-06		1.00074
123			5418.12					5346.69	5426.11	5352.1	5432.59	5409.38	5485.08	5412.44	5488.5	5465.8	5376.62		0.986817	0.973808	0.000173792	3.31762e-05		1.00147	1.00295	2.1749e-06	3.10085e-06		0.987815	0.975779	0.000148468	2.19041e-05		1.00267	1.00535	7.12908e-06	9.13838e-06		0.998387	0.996778	2.60023e-06	4.74313e-05		1.01236	1.02487	0.00015272	1.09605e-08		0.998951
			3235.77					3200.25	3243.9	3202.41	3246.54	3234.8	3275.7	3236.05	3277.11	3266.62	3217.05		0.989022	0.978165	0.00012051	1.25171e-05		1.00251	1.00503	6.3064e-06	7.82724e-06		0.989689	0.979484	0.000106318	7.79673e-06		1.00333	1.00667	1.1081e-05	1.3557e-05		0.9997	0.999401	8.97813e-08	3.11486e-05		1.01234	1.02483	0.000152294	1.48239e-08		1.00009
10-atomics								b3lyp-def2-svp-d3bj	b3lyp-def2-tzvp-d3bj	b3lyp-def2-svp-d4	b3lyp-def2-tzvp-d4	pbe0-def2-svp-d3bj	pbe0-def2-tzvp-d3bj	pbe0-def2-svp-d4	pbe0-def2-tzvp-d4	pbeh-3c	r2scan-3c
1	Cyclobutene	C4H6	12784.8	0.007			https://doi.org/10.1016/0022-2860(69)87033-X	12875.7	12986.8	12878.3	12989.6	12983.6	13080.1	12985.2	13081.8	13099.2	12955.1		1.00711	1.01427	5.05767e-05	0.000215724		1.0158	1.03185	0.000249666	0.000258923		1.00731	1.01468	5.35036e-05	0.00022402		1.01602	1.0323	0.000256705	0.000268293		1.01555	1.03134	0.000241793	0.000103724		1.0231	1.04673	0.000533548	0.000110328		1.01568
124			12015.6	0.007				12210.7	12294.4	12214.9	12299	12326.5	12392.3	12328.8	12394.7	12399.9	12293.2		1.01624	1.03274	0.00026367	0.000570368		1.0232	1.04695	0.000538404	0.000552058		1.01659	1.03345	0.000275078	0.000590908		1.02358	1.04772	0.000556152	0.000573276		1.02587	1.05241	0.000669328	0.00041827		1.03135	1.06368	0.000982608	0.000347827		1.02606
			6720.51	0.007				6812.84	6860.08	6814.66	6862.08	6877.13	6917	6878.21	6918.14	6921.14	6855.9		1.01374	1.02766	0.000188736	0.000456411		1.02077	1.04197	0.000431297	0.000443497		1.01401	1.02821	0.000196249	0.000471431		1.02107	1.04257	0.000443759	0.000459031		1.0233	1.04715	0.00054308	0.000320336		1.02924	1.05933	0.000854793	0.000274444		1.02347
								b3lyp-def2-svp-d3bj	b3lyp-def2-tzvp-d3bj	b3lyp-def2-svp-d4	b3lyp-def2-tzvp-d4	pbe0-def2-svp-d3bj	pbe0-def2-tzvp-d3bj	pbe0-def2-svp-d4	pbe0-def2-tzvp-d4	pbeh-3c	r2scan-3c
2	Methylenecyclopropane	C4H6	19417.6	0.1			https://doi.org/10.1021/ja00709a006	19433.3	19592.8	19430.3	19589.6	19621.3	19751.7	19620.4	19750.8	19798.2	19587.5		1.00081	1.00162	6.53378e-07	6.95007e-05		1.00902	1.01813	8.14362e-05	8.67232e-05		1.00065	1.0013	4.25409e-07	6.81337e-05		1.00886	1.01779	7.8432e-05	8.48481e-05		1.01049	1.02109	0.000109999	2.65184e-05		1.0172	1.03471	0.000296001	2.19242e-05		1.01044
125			6877.11	0.03				6838.36	6926.4	6836.29	6924.27	6868.2	6944.46	6867.33	6943.58	6938.94	6916.44		0.994365	0.988762	3.17522e-05	3.40408e-06		1.00717	1.01438	5.13604e-05	5.55683e-05		0.994064	0.988163	3.52368e-05	2.61136e-06		1.00686	1.01376	4.70248e-05	5.20112e-05		0.998704	0.99741	1.6793e-06	4.31921e-05		1.00979	1.01968	9.59054e-05	6.95897e-06		0.998578
			5455.12	0.03				5428.88	5489.13	5427.25	5487.46	5461.84	5513.98	5461.19	5513.33	5511.04	5485.85		0.99519	0.990403	2.3135e-05	7.16229e-06		1.00624	1.01251	3.88753e-05	4.25435e-05		0.994892	0.98981	2.60938e-05	6.00301e-06		1.00593	1.01189	3.51541e-05	3.94783e-05		1.00123	1.00247	1.51824e-06	1.64623e-05		1.01079	1.0217	0.000116439	2.73146e-06		1.00111
								b3lyp-def2-svp-d3bj	b3lyp-def2-tzvp-d3bj	b3lyp-def2-svp-d4	b3lyp-def2-tzvp-d4	pbe0-def2-svp-d3bj	pbe0-def2-tzvp-d3bj	pbe0-def2-svp-d4	pbe0-def2-tzvp-d4	pbeh-3c	r2scan-3c
3	Bicyclo[1,1,0]butane	C4H6	17312	0.1			https://doi.org/10.1021/ja00973a066	17347.2	17542.9	17343.8	17539.5	17432.6	17578.4	17431.3	17577	17602.3	17501.2		1.00203	1.00407	4.13286e-06	9.15953e-05		1.01334	1.02686	0.00017796	0.000185769		1.00184	1.00368	3.3838e-06	8.9314e-05		1.01314	1.02645	0.000172652	0.000182151		1.00697	1.01399	4.85652e-05	2.71926e-06		1.01539	1.03102	0.000236854	8.35236e-06		1.00689
126			9313.51	0.1				9271.94	9338.55	9269.75	9336.29	9355.9	9414.81	9355.22	9414.1	9419.69	9333.61		0.995536	0.991092	1.99253e-05	9.15035e-06		1.00269	1.00538	7.22802e-06	8.85071e-06		0.995301	0.990624	2.2079e-05	8.19443e-06		1.00245	1.0049	5.98416e-06	7.83506e-06		1.00455	1.00912	2.07156e-05	5.71004e-07		1.01088	1.02187	0.000118305	2.45747e-06		1.00448
			8393.52	0.1				8380.33	8424.36	8377.99	8422.06	8473.62	8514.61	8472.89	8513.88	8523.32	8433.55		0.998428	0.996859	2.471e-06	3.52663e-05		1.00367	1.00736	1.35004e-05	1.56902e-05		0.99815	0.996303	3.4224e-06	3.28684e-05		1.0034	1.00681	1.15603e-05	1.40868e-05		1.00954	1.01918	9.10692e-05	1.77205e-05		1.01443	1.02906	0.000208129	3.75782e-06		1.00946
								b3lyp-def2-svp-d3bj	b3lyp-def2-tzvp-d3bj	b3lyp-def2-svp-d4	b3lyp-def2-tzvp-d4	pbe0-def2-svp-d3bj	pbe0-def2-tzvp-d3bj	pbe0-def2-svp-d4	pbe0-def2-tzvp-d4	pbeh-3c	r2scan-3c
4	Pyrrole	C4H5N	9130.61				https://doi.org/10.1063/1.1742597	9113.95	9180.86	9123.04	9191.51	9189.59	9250.44	9194.75	9256.32	9276.23	9160.26		0.998175	0.996353	3.33121e-06	3.23013e-05		1.0055	1.01104	3.02919e-05	3.35372e-05		0.999171	0.998342	6.87807e-07	4.57176e-05		1.00667	1.01338	4.44912e-05	4.93439e-05		1.00646	1.01296	4.17314e-05	1.30604e-06		1.01312	1.02642	0.000172231	4.24554e-07		1.00703
127			9001.23					8962.2	9063.25	8964.43	9066.15	9022.33	9112.83	9023.73	9114.54	9132.25	9040.21		0.995664	0.991347	1.88002e-05	9.94629e-06		1.00689	1.01383	4.74783e-05	5.15261e-05		0.995912	0.99184	1.67136e-05	1.20954e-05		1.00721	1.01448	5.20227e-05	5.72627e-05		1.00234	1.00469	5.49725e-06	8.70723e-06		1.0124	1.02495	0.000153725	4.17626e-09		1.0025
			4532.09					4518.72	4560.84	4521.52	4564.2	4552.6	4590.56	4554.22	4592.44	4601.84	4549.92		0.99705	0.994108	8.7053e-06	2.06992e-05		1.00634	1.01273	4.02402e-05	4.39711e-05		0.997668	0.995341	5.44e-06	2.75313e-05		1.00709	1.01422	5.02016e-05	5.53507e-05		1.00453	1.00907	2.04762e-05	6.11334e-07		1.0129	1.02597	0.000166442	1.86516e-07		1.00488
								b3lyp-def2-svp-d3bj	b3lyp-def2-tzvp-d3bj	b3lyp-def2-svp-d4	b3lyp-def2-tzvp-d4	pbe0-def2-svp-d3bj	pbe0-def2-tzvp-d3bj	pbe0-def2-svp-d4	pbe0-def2-tzvp-d4	pbeh-3c	r2scan-3c
5	1,3-Diazine	C4H4N2	6276.83	7.9e-05			https://doi.org/10.1063/1.5144914	6262.16	6317	6264.53	6319.96	6303.92	6356.83	6305.42	6358.64	6370.83	6295.68		0.997663	0.995332	5.45983e-06	2.67093e-05		1.0064	1.01284	4.09676e-05	4.47317e-05		0.99804	0.996084	3.84131e-06	3.16104e-05		1.00687	1.01379	4.72131e-05	5.22093e-05		1.00432	1.00865	1.8633e-05	9.7861e-07		1.01275	1.02565	0.000162443	7.71996e-08		1.00456
128			6067.17	7.8e-05				6077.41	6124.33	6078.97	6126.21	6118.04	6155.85	6119.03	6157	6181.69	6085.47		1.00169	1.00338	2.85126e-06	8.50744e-05		1.00942	1.01893	8.8762e-05	9.42802e-05		1.00194	1.00389	3.78245e-06	9.13315e-05		1.00973	1.01956	9.47221e-05	0.000101767		1.00838	1.01684	7.03081e-05	9.34927e-06		1.01462	1.02945	0.000213679	4.52525e-06		1.00855
			3084.45	0.0001				3084.2	3109.59	3085.18	3110.79	3104.79	3127.36	3105.41	3128.1	3137.42	3094.39		0.99992	0.999839	6.45537e-09	5.53738e-05		1.00815	1.01637	6.64173e-05	7.11957e-05		1.00024	1.00047	5.5429e-08	6.1377e-05		1.00854	1.01715	7.29234e-05	7.91126e-05		1.0066	1.01324	4.351e-05	1.63412e-06		1.01391	1.02802	0.000193575	2.04857e-06		1.0068
								b3lyp-d3bj-def2-svp	b3lyp-d3bj-def2-tzvp	b3lyp-d4-def2-svp	b3lyp-d4-def2-tzvp	pbe0-d3bj-def2-svp	pbe0-d3bj-def2-tzvp	pbe0-d4-def2-svp	pbe0-d4-def2-tzvp	pbeh-3c	r2scan-3c
7	Propanal	CH3CH2CHO	16669.6	0.000154			https://doi.org/10.1016/j.jms.2017.07.008	16671.4	16868.4	16672.2	16869.8	16773.4	16920.2	16773.4	16920.3	16966.3	16736.1		1.00011	1.00021	1.13598e-08	5.82122e-05		1.01192	1.02399	0.000142124	0.000149102		1.00015	1.0003	2.30213e-08	6.00626e-05		1.01201	1.02416	0.00014414	0.000152821		1.00623	1.0125	3.87916e-05	8.32381e-07		1.01503	1.03029	0.000225955	6.43222e-06		1.00622
129	syn		5893.5	4.9e-05				5865.01	5861.57	5860.16	5856.61	5926.14	5933.14	5924.79	5931.77	5879.45	5892.64		0.995165	0.990353	2.33774e-05	7.02741e-06		0.994582	0.989193	2.9358e-05	2.6359e-05		0.994342	0.988715	3.20162e-05	3.59424e-06		0.993741	0.987521	3.91788e-05	3.49221e-05		1.00554	1.0111	3.06583e-05	5.04928e-08		1.00673	1.0135	4.52261e-05	3.21298e-05		1.00531
			4598.98	4.8e-05				4584.62	4593.2	4581.71	4590.25	4628.63	4640.94	4627.79	4640.11	4610.37	4603.42		0.996878	0.993766	9.74756e-06	1.91556e-05		0.998742	0.997485	1.58283e-06	9.46181e-07		0.996243	0.992501	1.41121e-05	1.45311e-05		0.998101	0.996206	3.60489e-06	2.3942e-06		1.00645	1.01293	4.15595e-05	1.27593e-06		1.00912	1.01833	8.32361e-05	1.08867e-05		1.00626
								b3lyp-def2-svp-d3bj	b3lyp-def2-tzvp-d3bj	b3lyp-def2-svp-d4	b3lyp-def2-tzvp-d4	pbe0-def2-svp-d3bj	pbe0-def2-tzvp-d3bj	pbe0-def2-svp-d4	pbe0-def2-tzvp-d4	pbeh-3c	r2scan-3c
8	Oxetane	C3H6O	12045.5	0.00079			https://doi.org/10.1016/0022-2860(95)08887-2	12074.2	12072	12070.6	12068.5	12235.8	12228.4	12234.7	12227.3	12274.2	12033.3		1.00238	1.00477	5.6853e-06	9.84983e-05		1.0022	1.00441	4.85056e-06	6.19401e-06		1.00209	1.00419	4.37137e-06	9.41635e-05		1.00191	1.00382	3.6442e-06	5.11507e-06		1.01581	1.03186	0.00024981	0.000108969		1.01519	1.03061	0.000230659	7.2358e-06		1.01571
130			11734	0.00078				11790.3	11805.5	11790.2	11805.6	11899.2	11895.3	11899.5	11895.4	11943	11741		1.00479	1.00961	2.29861e-05	0.000152591		1.00609	1.01221	3.70456e-05	4.06278e-05		1.00479	1.00959	2.29031e-05	0.000154236		1.0061	1.01223	3.71707e-05	4.16144e-05		1.01408	1.02835	0.000198173	7.6038e-05		1.01374	1.02767	0.000188773	1.58701e-06		1.0141
			6730.66	0.00069				6738.49	6730.04	6737.18	6728.82	6821.78	6808.72	6821.46	6808.35	6831.24	6722.42		1.00116	1.00233	1.35444e-06	7.56007e-05		0.999908	0.999815	8.513e-09	3.74252e-08		1.00097	1.00194	9.39765e-07	7.35118e-05		0.999727	0.999453	7.47366e-08	6.1662e-09		1.01354	1.02726	0.000183304	6.69849e-05		1.0116	1.02333	0.000134512	7.31721e-07		1.01349
								b3lyp-def2-svp-d3bj	b3lyp-def2-tzvp-d3bj	b3lyp-def2-svp-d4	b3lyp-def2-tzvp-d4	pbe0-def2-svp-d3bj	pbe0-def2-tzvp-d3bj	pbe0-def2-svp-d4	pbe0-def2-tzvp-d4	pbeh-3c	r2scan-3c
9	Acetone	CH3COCH3	10165.2	0.0008			https://dx.doi.org/10.1086/341221	10102	10182.6	10107.8	10188.6	10186.2	10237.7	10188.6	10240.3	10155.1	10122.5		0.993785	0.987609	3.86257e-05	1.58911e-06		1.00171	1.00342	2.92309e-06	3.98378e-06		0.994354	0.98874	3.18779e-05	3.64115e-06		1.0023	1.00461	5.29502e-06	7.0432e-06		1.00206	1.00412	4.24375e-06	1.0458e-05		1.00713	1.01431	5.07987e-05	2.77832e-05		1.0023
131			8515.16	0.00065				8484.59	8542.45	8474.45	8532.16	8555.4	8619.18	8551.61	8615.29	8640.46	8558.25		0.99641	0.992832	1.28896e-05	1.52498e-05		1.0032	1.00642	1.02655e-05	1.21846e-05		0.995219	0.99046	2.28603e-05	7.7259e-06		1.002	1.00399	3.98128e-06	5.5132e-06		1.00473	1.00947	2.23305e-05	3.39292e-07		1.01222	1.02458	0.000149215	6.03009e-08		1.00428
			4910.2	0.00044				4893.83	4926.73	4891.81	4924.7	4936.32	4965.07	4935.62	4964.38	4949.97	4918.71		0.996667	0.993344	1.11113e-05	1.73378e-05		1.00337	1.00674	1.13284e-05	1.33406e-05		0.996255	0.992523	1.40274e-05	1.4618e-05		1.00295	1.00592	8.72565e-06	1.0936e-05		1.00532	1.01067	2.82981e-05	0		1.01118	1.02248	0.000124891	1.61974e-06		1.00518
								b3lyp-def2-svp-d3bj	b3lyp-def2-tzvp-d3bj	b3lyp-def2-svp-d4	b3lyp-def2-tzvp-d4	pbe0-def2-svp-d3bj	pbe0-def2-tzvp-d3bj	pbe0-def2-svp-d4	pbe0-def2-tzvp-d4	pbeh-3c	r2scan-3c
10	Acrylamide	CH2CHCONH2	10732.8	6.5e-05			https://doi.org/10.1051/0004-6361/202142448	10696.9	10759.1	10698.9	10761.1	10772.6	10818.1	10773.6	10819.3	10803.3	10692.9		0.996654	0.993319	1.11949e-05	1.7233e-05		1.00245	1.00491	6.01369e-06	7.50065e-06		0.996835	0.993681	1.00151e-05	1.94341e-05		1.00264	1.00529	6.96513e-06	8.95256e-06		1.0037	1.00742	1.37067e-05	2.5611e-06		1.00795	1.01596	6.31844e-05	1.98876e-05		1.0038
132	syn		4218.69	4.1e-05				4207.21	4231.12	4206.06	4230	4244.81	4269.95	4244.55	4269.71	4255.92	4230.57		0.99728	0.994567	7.4001e-06	2.28631e-05		1.00295	1.0059	8.68109e-06	1.0452e-05		0.997007	0.994023	8.95778e-06	2.09895e-05		1.00268	1.00537	7.19143e-06	9.20897e-06		1.00619	1.01242	3.83372e-05	7.673e-07		1.01215	1.02445	0.000147634	9.5898e-08		1.00613
			3030.75	3.3e-05				3019.58	3036.85	3019.14	3036.44	3044.97	3061.55	3044.92	3061.52	3053.15	3031.94		0.996313	0.99264	1.35915e-05	1.45002e-05		1.00201	1.00403	4.05064e-06	5.28514e-06		0.996169	0.992353	1.46771e-05	1.39648e-05		1.00188	1.00375	3.51751e-06	4.96472e-06		1.00469	1.00941	2.20113e-05	3.79701e-07		1.01016	1.02042	0.000103239	5.17556e-06		1.00468
								b3lyp-def2-svp-d3bj	b3lyp-def2-tzvp-d3bj	b3lyp-def2-svp-d4	b3lyp-def2-tzvp-d4	pbe0-def2-svp-d3bj	pbe0-def2-tzvp-d3bj	pbe0-def2-svp-d4	pbe0-def2-tzvp-d4	pbeh-3c	r2scan-3c
11	Methoxyacetonitrile	CH3OCH2CN	11893.4	0.05			https://doi.org/10.1139/v74-080	12098.8	12025.1	12111.7	12039.3	12218.7	12127.4	12223.4	12131.8	12245.7	11754.2		1.01727	1.03484	0.000298297	0.000621181		1.01108	1.02228	0.000122683	0.000129167		1.01836	1.03706	0.000337102	0.000681051		1.01227	1.02469	0.000150606	0.000159479		1.02736	1.05546	0.000748459	0.000480943		1.01968	1.03975	0.000387361	5.08176e-05		1.02775
133			3423.26	0.02				3352.4	3391.34	3345.83	3384.14	3385.23	3432.66	3382.81	3430.23	3403.4	3443.86		0.979301	0.95903	0.000428459	0.000177759		0.990674	0.981436	8.69666e-05	8.17669e-05		0.97738	0.955272	0.000511665	0.00023088		0.988573	0.977277	0.000130575	0.000122743		0.988891	0.977906	0.000123404	0.00026677		1.00275	1.0055	7.54449e-06	9.21149e-05		0.988184
			2871.53	0.02				2836.64	2858.93	2832.92	2855	2863.96	2892.36	2862.62	2891.06	2875.73	2881.1		0.987849	0.975845	0.000147652	2.22813e-05		0.995612	0.991244	1.92513e-05	1.68357e-05		0.986555	0.973291	0.000180768	3.54027e-05		0.994243	0.988518	3.31476e-05	2.92402e-05		0.997363	0.994733	6.95378e-06	6.25065e-05		1.00725	1.01456	5.2635e-05	2.64698e-05		0.996898
								b3lyp-def2-svp-d3bj	b3lyp-def2-tzvp-d3bj	b3lyp-def2-svp-d4	b3lyp-def2-tzvp-d4	pbe0-def2-svp-d3bj	pbe0-def2-tzvp-d3bj	pbe0-def2-svp-d4	pbe0-def2-tzvp-d4	pbeh-3c	r2scan-3c
12	2(5H)-Furanone	C4H4O2	8221.38				https://doi.org/10.1039/C29700000838	8235.74	8277.99	8235.56	8277.99	8314.05	8345.01	8314.25	8345.3	8366.02	8258.5		1.00175	1.0035	3.05209e-06	8.61643e-05		1.00689	1.01382	4.74095e-05	5.14544e-05		1.00172	1.00345	2.9728e-06	8.71311e-05		1.00689	1.01382	4.7415e-05	5.24217e-05		1.01127	1.02267	0.000127059	3.51583e-05		1.01504	1.0303	0.000226133	6.46192e-06		1.0113
134			3883.71					3871.51	3889.07	3872.71	3890.41	3907.98	3925.43	3908.76	3926.31	3938.39	3874.26		0.996861	0.993732	9.85405e-06	1.90059e-05		1.00138	1.00277	1.91088e-06	2.78385e-06		0.997168	0.994344	8.01934e-06	2.25033e-05		1.00173	1.00346	2.98296e-06	4.32529e-06		1.00625	1.01254	3.90528e-05	8.70807e-07		1.01074	1.0216	0.000115443	2.88451e-06		1.00645
			2682.5					2678.28	2690.64	2678.81	2691.26	2703.85	2715.09	2704.24	2715.53	2723.18	2681.86		0.998428	0.996858	2.47196e-06	3.52627e-05		1.00303	1.00608	9.2049e-06	1.10262e-05		0.998626	0.997254	1.88745e-06	3.85994e-05		1.00327	1.00654	1.06683e-05	1.30999e-05		1.00796	1.01598	6.33393e-05	6.93541e-06		1.01215	1.02445	0.000147644	9.56397e-08		1.0081
								b3lyp-def2-svp-d3bj	b3lyp-def2-tzvp-d3bj	b3lyp-def2-svp-d4	b3lyp-def2-tzvp-d4	pbe0-def2-svp-d3bj	pbe0-def2-tzvp-d3bj	pbe0-def2-svp-d4	pbe0-def2-tzvp-d4	pbeh-3c	r2scan-3c
13	dimethylphosphine	CH3PHCH3	16071.9				https://doi.org/10.1063/1.441178	15736.1	16041.2	15757.4	16064.2	15983.8	16211.7	15993.8	16222.5	15985.5	15735.2		0.979106	0.958648	0.000436568	0.000183036		0.998091	0.996186	3.64282e-06	2.63548e-06		0.980434	0.961252	0.000382811	0.000146823		0.999523	0.999047	2.27101e-07	1.55544e-08		0.99452	0.989071	3.00251e-05	0.00011521		1.0087	1.01748	7.5747e-05	1.3797e-05		0.995142
135			7018.19					6891.97	6956.7	6878.14	6942.5	6947.03	7027.1	6941.78	7021.58	6999.17	6929.88		0.982015	0.964353	0.000323469	0.000112323		0.991239	0.982554	7.67594e-05	7.18764e-05		0.980045	0.960488	0.000398196	0.000156483		0.989215	0.978547	0.000116308	0.000108919		0.989861	0.979824	0.000102807	0.000236202		1.00127	1.00254	1.61084e-06	0.000122257		0.989113
			5403.61					5307.53	5370.25	5301.76	5364.36	5366.66	5431.82	5364.67	5429.75	5385.7	5323.6		0.982219	0.964754	0.000316162	0.000108002		0.993827	0.987692	3.81068e-05	3.46813e-05		0.981152	0.962659	0.000355246	0.000129824		0.992737	0.985527	5.27495e-05	4.77957e-05		0.993162	0.986371	4.67552e-05	0.00014604		1.00522	1.01047	2.72633e-05	5.11712e-05		0.992793
								b3lyp-def2-svp-d3bj	b3lyp-def2-tzvp-d3bj	b3lyp-def2-svp-d4	b3lyp-def2-tzvp-d4	pbe0-def2-svp-d3bj	pbe0-def2-tzvp-d3bj	pbe0-def2-svp-d4	pbe0-def2-tzvp-d4	pbeh-3c	r2scan-3c
14	Disulfide, dimethyl	CH3SSCH3	8163.83	0.001			https://doi.org/10.1016/0022-2860(92)87078-A	8003.23	8162.71	8022.77	8185.14	8174.83	8322.61	8184.53	8332.7	8168.17	8022.97		0.980328	0.961042	0.000387004	0.000151243		0.999863	0.999726	1.87864e-08	2.20955e-08		0.982722	0.965742	0.000298544	9.62866e-05		1.00261	1.00523	6.81369e-06	8.7807e-06		1.00135	1.0027	1.8169e-06	1.55412e-05		1.01945	1.03928	0.000378248	4.75911e-05		1.00254
136			2816.43	0.001				2710.95	2748.64	2702.04	2739.24	2756.01	2800.27	2752.15	2796.29	2781.56	2707.64		0.962546	0.926494	0.00140282	0.000912863		0.975928	0.952436	0.000579447	0.000566099		0.959384	0.920418	0.00164963	0.0011107		0.972593	0.945936	0.000751163	0.000732515		0.978546	0.957552	0.000460273	0.00070882		0.994262	0.988557	3.29219e-05	0.000323197		0.977175
			2570.35	0.001				2504.23	2519.44	2498.39	2513.78	2547.01	2566.45	2544.99	2564.34	2569.33	2490.71		0.974273	0.949208	0.000661863	0.000338483		0.980193	0.960778	0.00039232	0.000381303		0.972002	0.944789	0.00078387	0.000424906		0.97799	0.956465	0.000484418	0.000469383		0.99092	0.981923	8.24377e-05	0.000204908		0.998481	0.996964	2.30739e-06	0.00019074		0.990133
11-atomics								b3lyp-def2-svp-d3bj	b3lyp-def2-tzvp-d3bj	b3lyp-def2-svp-d4	b3lyp-def2-tzvp-d4	pbe0-def2-svp-d3bj	pbe0-def2-tzvp-d3bj	pbe0-def2-svp-d4	pbe0-def2-tzvp-d4	pbeh-3c	r2scan-3c
1	Propane	C3H8	29207.4				https://doi.org/10.1063/1.1731434	29346.4	29562.1	29358.8	29575.2	29556.9	29650.8	29561.9	29656	29671.5	29339.2		1.00476	1.00954	2.2646e-05	0.000151706		1.01214	1.02444	0.0001475	0.000154609		1.00519	1.0104	2.68868e-05	0.000164398		1.01259	1.02534	0.000158574	0.000167678		1.01197	1.02408	0.00014325	4.38568e-05		1.01518	1.03059	0.000230489	7.20611e-06		1.01214
137			8446.07					8356.55	8437	8346.35	8426.62	8425.17	8516.14	8421.43	8512.24	8483.5	8458.33		0.989401	0.978915	0.000112334	9.96141e-06		0.998927	0.997854	1.15211e-06	6.20819e-07		0.988193	0.976526	0.000139398	1.84838e-05		0.997697	0.9954	5.3024e-06	3.80836e-06		0.997525	0.995057	6.12324e-06	5.9977e-05		1.0083	1.01666	6.88203e-05	1.69488e-05		0.997082
			7458.98					7410.31	7470.92	7403.09	7463.64	7474.48	7538.64	7471.86	7535.94	7509.78	7479.5		0.993475	0.986992	4.25817e-05	8.98243e-07		1.0016	1.00321	2.56408e-06	3.56258e-06		0.992507	0.98507	5.61466e-05	2.21804e-09		1.00062	1.00125	3.89642e-07	9.53424e-07		1.00208	1.00416	4.31834e-06	1.03424e-05		1.01068	1.02147	0.000114061	3.10504e-06		1.00173
								b3lyp-def2-svp-d3bj	b3lyp-def2-tzvp-d3bj	b3lyp-def2-svp-d4	b3lyp-def2-tzvp-d4	pbe0-def2-svp-d3bj	pbe0-def2-tzvp-d3bj	pbe0-def2-svp-d4	pbe0-def2-tzvp-d4	pbeh-3c	r2scan-3c
3	Cyclopropylamine	C3H7N	16270				https://doi.org/10.1063/1.1672059	16197.4	16300.7	16199.8	16303.3	16339.2	16403.4	16340.3	16404.4	16448.4	16238.4		0.995538	0.991096	1.99094e-05	9.16123e-06		1.00189	1.00378	3.56548e-06	4.7286e-06		0.99569	0.991398	1.85791e-05	1.05887e-05		1.00205	1.00411	4.20602e-06	5.77721e-06		1.00426	1.00854	1.81405e-05	1.0949e-06		1.0082	1.01647	6.72393e-05	1.77371e-05		1.00433
138			6723					6576.35	6622.74	6570.78	6617.17	6634.59	6683.53	6632.6	6681.65	6663.64	6615.63		0.978186	0.956849	0.000475831	0.000208957		0.985086	0.970395	0.000222413	0.000214096		0.977358	0.955228	0.000512667	0.000231558		0.984259	0.968765	0.00024779	0.000237002		0.98685	0.973873	0.000172921	0.000337219		0.994129	0.988293	3.4467e-05	0.000327941		0.986553
			5795.33					5747.4	5780.13	5742.74	5775.4	5799.95	5836.09	5798.3	5834.43	5813.73	5783.44		0.99173	0.983528	6.83957e-05	6.56216e-07		0.997378	0.994762	6.87744e-06	5.46386e-06		0.990925	0.981933	8.23487e-05	2.39147e-06		0.99656	0.993132	1.18321e-05	9.54185e-06		1.0008	1.0016	6.3628e-07	2.01563e-05		1.00703	1.01412	4.94653e-05	2.87724e-05		1.00051
								b3lyp-def2-svp-d3bj	b3lyp-def2-tzvp-d3bj	b3lyp-def2-svp-d4	b3lyp-def2-tzvp-d4	pbe0-def2-svp-d3bj	pbe0-def2-tzvp-d3bj	pbe0-def2-svp-d4	pbe0-def2-tzvp-d4	pbeh-3c	r2scan-3c
4	Azetidine	C3H7N	11453				https://doi.org/10.1016/0022-2852(84)90251-0	11454.5	11492.3	11450.6	11488.4	11586.8	11623.9	11585.6	11622.9	11642	11455.5		1.00013	1.00027	1.75933e-08	5.86135e-05		1.00343	1.00686	1.17372e-05	1.37841e-05		0.999789	0.999578	4.4498e-08	5.4532e-05		1.00309	1.00618	9.53079e-06	1.18356e-05		1.01168	1.02349	0.000136378	4.01115e-05		1.01492	1.03007	0.000222686	5.89708e-06		1.01158
139			11339.1					11417.3	11425.8	11417	11425.2	11538.6	11525.3	11538.8	11525.4	11571.2	11350.7		1.0069	1.01384	4.7557e-05	0.000209391		1.00765	1.01536	5.85053e-05	6.29929e-05		1.00687	1.01379	4.72219e-05	0.000210864		1.00759	1.01524	5.76428e-05	6.31541e-05		1.0176	1.0355	0.00030963	0.000149336		1.01642	1.03312	0.000269739	1.52957e-05		1.01761
			6611.95					6597.23	6610.69	6594.46	6607.95	6688.37	6704.69	6687.56	6703.93	6696.73	6609.96		0.997774	0.995554	4.95314e-06	2.78784e-05		0.999809	0.999618	3.65308e-08	8.9422e-09		0.997355	0.994718	6.99362e-06	2.43294e-05		0.999396	0.998791	3.65398e-07	6.38537e-08		1.01156	1.02325	0.000133601	3.86199e-05		1.01403	1.02825	0.000196748	2.38225e-06		1.01143
								b3lyp-def2-svp-d3bj	b3lyp-def2-tzvp-d3bj	b3lyp-def2-svp-d4	b3lyp-def2-tzvp-d4	pbe0-def2-svp-d3bj	pbe0-def2-tzvp-d3bj	pbe0-def2-svp-d4	pbe0-def2-tzvp-d4	pbeh-3c	r2scan-3c
5	3-Aminopropionitrile	C3H6N2	10526.5	0.00068			https://doi.org/10.1016/j.jms.2017.12.003	10240.6	10402.2	10242.9	10406	10341	10464.5	10339.9	10463.9	10409.6	10214		0.972838	0.946414	0.00073776	0.000393774		0.988189	0.976517	0.000139504	0.000132913		0.973052	0.94683	0.000726196	0.000382422		0.98855	0.977231	0.000131099	0.000123252		0.982379	0.965069	0.000310494	0.000520331		0.994107	0.988248	3.4732e-05	0.000328747		0.982266
140			3387.38	0.0002				3354.38	3337.24	3348.75	3331.26	3376.13	3370.85	3375.04	3369.59	3383.55	3395.39		0.990256	0.980607	9.49418e-05	5.26609e-06		0.985196	0.970612	0.000219144	0.000210889		0.988594	0.977319	0.000130086	1.51713e-05		0.983432	0.967138	0.000274503	0.000263152		0.996677	0.993365	1.10414e-05	7.37595e-05		0.99512	0.990264	2.38139e-05	0.000293452		0.996355
			2781.57	0.00017				2745.37	2749.46	2741.47	2745.38	2764.82	2775.27	2763.86	2774.22	2774.36	2776.17		0.986983	0.974136	0.00016944	3.12763e-05		0.988453	0.97704	0.000133324	0.000126881		0.985582	0.971372	0.000207873	4.80278e-05		0.986989	0.974147	0.000169284	0.000160364		0.993978	0.987992	3.62675e-05	0.000127091		0.997735	0.995475	5.13136e-06	0.000211642		0.99363
								b3lyp-def2-svp-d3bj	b3lyp-def2-tzvp-d3bj	b3lyp-def2-svp-d4	b3lyp-def2-tzvp-d4	pbe0-def2-svp-d3bj	pbe0-def2-tzvp-d3bj	pbe0-def2-svp-d4	pbe0-def2-tzvp-d4	pbeh-3c	r2scan-3c
6	Pyridine	C5H5N	6039.26				https://doi.org/10.1016/0022-2860(77)87021-X	6014.97	6076.63	6016.12	6078.22	6050.87	6110.93	6051.71	6112.03	6116	6058.07		0.995978	0.991973	1.61734e-05	1.2044e-05		1.00619	1.01241	3.82841e-05	4.19247e-05		0.996168	0.99235	1.46866e-05	1.39555e-05		1.00645	1.01294	4.16159e-05	4.63123e-05		1.00192	1.00385	3.6951e-06	1.13631e-05		1.01187	1.02388	0.000140828	3.47578e-07		1.00206
141			6804.91					5803.79	5862.53	5804.34	5863.26	5835.55	5885.85	5835.99	5886.38	5899.99	5839.04		0.852883	0.727409	0.0216435	0.019797		0.861515	0.742207	0.0191782	0.0191101		0.852964	0.727547	0.0216197	0.0197561		0.861622	0.742392	0.0191485	0.0190647		0.857549	0.735391	0.0202922	0.0216035		0.864942	0.748125	0.0182407	0.0212302		0.857615
			2969.21					2953.75	2983.83	2954.17	2984.4	2970.63	2998.14	2970.95	2998.54	3003.03	2973.27		0.994792	0.989611	2.71246e-05	5.17566e-06		1.00492	1.00987	2.42391e-05	2.71491e-05		0.994933	0.989891	2.56763e-05	6.20731e-06		1.00512	1.01026	2.61765e-05	2.9922e-05		1.00048	1.00096	2.2795e-07	2.3118e-05		1.00974	1.01958	9.49229e-05	7.22353e-06		1.00058
								b3lyp-d3bj-def2-svp	b3lyp-d3bj-def2-tzvp	b3lyp-d4-def2-svp	b3lyp-d4-def2-tzvp	pbe0-d3bj-def2-svp	pbe0-d3bj-def2-tzvp	pbe0-d4-def2-svp	pbe0-d4-def2-tzvp	pbeh-3c	r2scan-3c
8	methyl acetate	CH3COOCH3	10246.6	0.01			https://doi.org/10.1016/0022-2852(80)90265-9	10213.2	10255.7	10212.3	10256.6	10305.8	10337.7	10306.1	10338	10339.7	10252.2		0.996744	0.993498	1.06047e-05	1.79889e-05		1.00089	1.00177	7.83647e-07	1.3718e-06		0.996648	0.993308	1.12331e-05	1.7809e-05		1.00098	1.00195	9.52748e-07	1.76473e-06		1.00577	1.01158	3.33433e-05	2.12356e-07		1.00889	1.01785	7.89963e-05	1.24749e-05		1.00581
142			4170.28	0.059				4155.14	4157.27	4153.41	4155.29	4207.64	4217.06	4206.94	4216.37	4179.13	4143.46		0.996371	0.992755	1.31701e-05	1.49456e-05		0.996881	0.993773	9.72507e-06	8.02955e-06		0.995956	0.991928	1.63549e-05	1.24064e-05		0.996405	0.992823	1.29254e-05	1.05265e-05		1.00896	1.018	8.02629e-05	1.31666e-05		1.01122	1.02256	0.000125835	1.51549e-06		1.00879
			3076.53	0.052				3067.75	3071.2	3066.72	3070.19	3104.42	3111.07	3104.07	3110.73	3090.02	3064.38		0.997148	0.994305	8.13123e-06	2.16163e-05		0.998267	0.996537	3.00308e-06	2.0958e-06		0.996814	0.993638	1.0151e-05	1.92444e-05		0.997941	0.995885	4.24102e-06	2.91759e-06		1.00907	1.01822	8.2203e-05	1.39551e-05		1.01123	1.02258	0.000126098	1.48707e-06		1.00895
								b3lyp-d3bj-def2-svp	b3lyp-d3bj-def2-tzvp	b3lyp-d4-def2-svp	b3lyp-d4-def2-tzvp	pbe0-d3bj-def2-svp	pbe0-d3bj-def2-tzvp	pbe0-d4-def2-svp	pbe0-d4-def2-tzvp	pbeh-3c	r2scan-3c
9	Cyclobutanone	C4H6O	10784.5	0.005			https://doi.org/10.1016/0022-2852(92)90236-H	10810.3	10861.3	10805.6	10856.8	10859	10907.1	10856.7	10904.9	10910.3	10843.5		1.00239	1.00479	5.72484e-06	9.86639e-05		1.00713	1.01431	5.083e-05	5.50163e-05		1.00196	1.00392	3.82633e-06	9.15482e-05		1.00671	1.01347	4.50405e-05	4.99225e-05		1.00691	1.01387	4.7736e-05	2.52679e-06		1.01137	1.02287	0.000129318	1.16366e-06		1.0067
143			4806.71	0.0007				4783.68	4813.53	4785.59	4815.54	4846.48	4865.35	4847.98	4866.91	4868.98	4802.56		0.99521	0.990442	2.29472e-05	7.26814e-06		1.00142	1.00284	2.01477e-06	2.909e-06		0.995606	0.991232	1.93048e-05	1.0049e-05		1.00184	1.00368	3.37975e-06	4.80073e-06		1.00827	1.01662	6.84704e-05	8.69031e-06		1.0122	1.02455	0.000148855	6.76696e-08		1.00859
			3558.46	0.0004				3539.73	3564.69	3540.22	3565.12	3602.7	3616.51	3603.33	3617.19	3618.23	3559.01		0.994736	0.989499	2.77119e-05	4.92176e-06		1.00175	1.00351	3.06604e-06	4.15043e-06		0.994872	0.989771	2.62924e-05	5.90761e-06		1.00187	1.00375	3.50221e-06	4.94653e-06		1.01243	1.02502	0.000154552	5.01717e-05		1.01631	1.03289	0.00026606	1.444e-05		1.01261
								b3lyp-d3bj-def2-svp	b3lyp-d3bj-def2-tzvp	b3lyp-d4-def2-svp	b3lyp-d4-def2-tzvp	pbe0-d3bj-def2-svp	pbe0-d3bj-def2-tzvp	pbe0-d4-def2-svp	pbe0-d4-def2-tzvp	pbeh-3c	r2scan-3c
10	Furan, 2,3-dihydro-		8084.06	1.7e-05			https://doi.org/10.1006/jmsp.1996.0256	8083.79	8105.51	8083.55	8105.3	8177.96	8201.82	8178.7	8202.61	8208.75	8095.04		0.999967	0.999933	1.10653e-09	5.6082e-05		1.00265	1.00531	7.03942e-06	8.64181e-06		0.999937	0.999875	3.92849e-09	5.67607e-05		1.00263	1.00526	6.90413e-06	8.88337e-06		1.01162	1.02337	0.00013492	3.93269e-05		1.01457	1.02935	0.000212189	4.31315e-06		1.01171
144			7785.82	1.6e-05				7790.07	7826.32	7790.01	7826.44	7860.17	7887.93	7860.48	7888.31	7903.53	7791.89		1.00055	1.00109	2.98044e-07	6.51628e-05		1.0052	1.01043	2.70601e-05	3.01309e-05		1.00054	1.00108	2.89915e-07	6.62539e-05		1.00522	1.01046	2.72115e-05	3.10283e-05		1.00955	1.01919	9.11973e-05	1.77767e-05		1.01312	1.0264	0.000172008	4.13659e-07		1.00959
			4201.14	1.3e-05				4195.76	4209.18	4195.2	4208.71	4245.71	4259.87	4245.92	4260.14	4252.89	4204.35		0.998719	0.99744	1.64022e-06	3.88374e-05		1.00191	1.00383	3.66142e-06	4.83903e-06		0.998586	0.997174	1.99885e-06	3.81007e-05		1.0018	1.00361	3.24658e-06	4.64171e-06		1.01061	1.02133	0.000112558	2.77757e-05		1.01398	1.02816	0.000195444	2.24238e-06		1.01066
								b3lyp-def2-svp-d3bj	b3lyp-def2-tzvp-d3bj	b3lyp-def2-svp-d4	b3lyp-def2-tzvp-d4	pbe0-def2-svp-d3bj	pbe0-def2-tzvp-d3bj	pbe0-def2-svp-d4	pbe0-def2-tzvp-d4	pbeh-3c	r2scan-3c
13	Nitric acid, ethyl ester	C2H5NO3	7945.62				https://doi.org/10.1063/1.1681207	8055.79	8032.22	8057.68	8034.71	8194.17	8164.74	8194.92	8165.68	8266.31	7926.88		1.01387	1.02792	0.000192243	0.000461897		1.0109	1.02192	0.000118789	0.000125169		1.0141	1.02841	0.000198918	0.000475594		1.01121	1.02255	0.000125726	0.000133835		1.03128	1.06354	0.000978534	0.000667356		1.02758	1.05592	0.000760535	0.000222837		1.03138
145			2557.14					2538.58	2529.55	2536.22	2527.1	2582.94	2579.67	2582.18	2578.87	2577.71	2532.9		0.992743	0.985538	5.26708e-05	4.42069e-08		0.989212	0.978541	0.000116372	0.000110354		0.991819	0.983704	6.69335e-05	4.17733e-07		0.988252	0.976643	0.000138004	0.000129952		1.01009	1.02028	0.000101829	2.26069e-05		1.00881	1.0177	7.75997e-05	1.30316e-05		1.00979
			2256.88					2237.03	2236.07	2235.21	2234.08	2277.24	2279.86	2276.63	2279.21	2270.44	2231.54		0.991207	0.982491	7.73194e-05	1.78752e-06		0.990778	0.98164	8.50526e-05	7.99108e-05		0.9904	0.980892	9.21618e-05	4.30938e-06		0.989899	0.979899	0.000102039	9.51205e-05		1.00902	1.01812	8.13462e-05	1.36053e-05		1.01018	1.02047	0.00010366	5.08304e-06		1.00875
								b3lyp-def2-svp-d3bj	b3lyp-def2-tzvp-d3bj	b3lyp-def2-svp-d4	b3lyp-def2-tzvp-d4	pbe0-def2-svp-d3bj	pbe0-def2-tzvp-d3bj	pbe0-def2-svp-d4	pbe0-def2-tzvp-d4	pbeh-3c	r2scan-3c
14	2-Fluoropropane	CH3CHFCH3	8693.82	0.02			10.1515/zna-1988-0208	8717.38	8689.39	8721.51	8693.51	8814.09	8781.86	8815.85	8783.65	8727.32	8640.18		1.00271	1.00543	7.34598e-06	0.000105125		0.999491	0.998981	2.59559e-07	5.01162e-08		1.00318	1.00638	1.01403e-05	0.000116763		0.999964	0.999928	1.29887e-09	9.98237e-08		1.01383	1.02786	0.000191384	7.18769e-05		1.01013	1.02036	0.000102551	5.32914e-06		1.01404
146			8102.51	0.02				8047.21	8092.39	8037.52	8082.6	8112.69	8167.16	8109.06	8163.45	8154.06	8108.79		0.993175	0.986397	4.65804e-05	4.17295e-07		0.99875	0.997503	1.56129e-06	9.29539e-07		0.991979	0.984022	6.43403e-05	2.35279e-07		0.997543	0.995091	6.03827e-06	4.43587e-06		1.00126	1.00251	1.578e-06	1.6269e-05		1.00798	1.01602	6.36658e-05	1.96222e-05		1.00081
			4788.83	0.01				4778.61	4781.58	4776.36	4779.32	4826.15	4832.73	4825.37	4831.94	4808.57	4779.62		0.997865	0.995734	4.55846e-06	2.88497e-05		0.998486	0.996975	2.29158e-06	1.50916e-06		0.997395	0.994797	6.78556e-06	2.4725e-05		0.998014	0.996032	3.94457e-06	2.67254e-06		1.00779	1.01565	6.07301e-05	6.09472e-06		1.00917	1.01842	8.40376e-05	1.06029e-05		1.00763
								b3lyp-def2-svp-d3bj	b3lyp-def2-tzvp-d3bj	b3lyp-def2-svp-d4	b3lyp-def2-tzvp-d4	pbe0-def2-svp-d3bj	pbe0-def2-tzvp-d3bj	pbe0-def2-svp-d4	pbe0-def2-tzvp-d4	pbeh-3c	r2scan-3c
15	1-Fluoropropane	CH2FCH2CH3	26986.7	0.0005	(trans)		https://doi.org/10.1016/0022-2860(86)80278-2	27201.3	27323.7	27198.3	27321	27393.5	27444.8	27391.8	27443.4	27408.9	27098.8		1.00795	1.01597	6.32213e-05	0.000241283		1.01249	1.02513	0.000155913	0.000163222		1.00784	1.01574	6.14452e-05	0.000240107		1.01239	1.02493	0.000153446	0.000162402		1.01507	1.03037	0.00022714	9.42553e-05		1.01697	1.03423	0.000288048	1.98247e-05		1.01501
147			3748.35	0.0008				3723.8	3726.98	3721.79	3724.93	3760.84	3770.85	3760.26	3770.25	3761.12	3734.48		0.993449	0.986941	4.29138e-05	8.50391e-07		0.994299	0.988631	3.25011e-05	2.93423e-05		0.992912	0.985875	5.02358e-05	2.07529e-07		0.993751	0.987541	3.90499e-05	3.48005e-05		1.00333	1.00667	1.10896e-05	3.88298e-06		1.006	1.01204	3.60147e-05	4.07455e-05		1.00318
			3509.94	0.0008				3491.91	3493.76	3490.09	3491.91	3526.94	3534.28	3526.4	3533.73	3523.54	3498.37		0.994865	0.989756	2.63704e-05	5.51529e-06		0.995391	0.990802	2.12466e-05	1.87054e-05		0.994345	0.988722	3.19771e-05	3.60747e-06		0.994863	0.989752	2.63904e-05	2.29151e-05		1.00484	1.00971	2.34635e-05	2.15954e-07		1.00694	1.01392	4.81103e-05	2.98093e-05		1.00469
								b3lyp-def2-svp-d3bj	b3lyp-def2-tzvp-d3bj	b3lyp-def2-svp-d4	b3lyp-def2-tzvp-d4	pbe0-def2-svp-d3bj	pbe0-def2-tzvp-d3bj	pbe0-def2-svp-d4	pbe0-def2-tzvp-d4	pbeh-3c	r2scan-3c
16	2,2-difluoropropane	CH3CF2CH3	5149.79	0.04			https://doi.org/10.1063/1.441032	5138.59	5122.11	5140.47	5124.09	5197.04	5180.88	5197.84	5181.71	5147.51	5099.24		0.997825	0.995654	4.73213e-06	2.84153e-05		0.994625	0.989278	2.88939e-05	2.59192e-05		0.99819	0.996383	3.27577e-06	3.33329e-05		0.99501	0.990045	2.48982e-05	2.15255e-05		1.00918	1.01843	8.41826e-05	1.47733e-05		1.00604	1.01211	3.64445e-05	4.02965e-05		1.00933
148			4840.11	0.02				4816.04	4822.84	4812.64	4819.34	4866.64	4881.7	4865.39	4880.44	4889.21	4802.38		0.995027	0.990078	2.47351e-05	6.30744e-06		0.996432	0.992876	1.27324e-05	1.07815e-05		0.994324	0.988681	3.22149e-05	3.52759e-06		0.995708	0.991435	1.84199e-05	1.55342e-05		1.00548	1.01099	3.00484e-05	2.87793e-08		1.00859	1.01726	7.38526e-05	1.46123e-05		1.00522
			4805.62	0.02				4798.22	4800	4796.03	4797.81	4842	4843.42	4841.2	4842.63	4807.4	4801.18		0.99846	0.996922	2.37174e-06	3.5649e-05		0.99883	0.997662	1.3678e-06	7.81659e-07		0.998004	0.996012	3.98337e-06	3.12048e-05		0.998374	0.996751	2.64411e-06	1.62471e-06		1.00757	1.0152	5.73036e-05	5.0485e-06		1.00787	1.0158	6.18857e-05	2.06175e-05		1.0074
								b3lyp-def2-svp-d3bj	b3lyp-def2-tzvp-d3bj	b3lyp-def2-svp-d4	b3lyp-def2-tzvp-d4	pbe0-def2-svp-d3bj	pbe0-def2-tzvp-d3bj	pbe0-def2-svp-d4	pbe0-def2-tzvp-d4	pbeh-3c	r2scan-3c
17	Propane, 2-chloro-	CH3CHClCH3	8068.18				https://doi.org/10.1016/0022-2852(92)90017-I	8008.98	8079.86	8000.93	8071.67	8074.79	8152.13	8071.68	8148.92	8120.07	8079.26		0.992662	0.985378	5.38471e-05	1.66547e-08		1.00145	1.0029	2.09428e-06	3.00441e-06		0.991664	0.983397	6.94889e-05	6.43537e-07		1.00043	1.00086	1.86481e-07	6.14636e-07		1.00082	1.00164	6.6935e-07	1.99739e-05		1.0104	1.02092	0.000108243	4.1398e-06		1.00043
149			4570.88					4493.07	4507.17	4490.95	4505.1	4574.51	4593.69	4574.43	4593.65	4585.3	4461.84		0.982977	0.966243	0.000289798	9.27216e-05		0.986062	0.972319	0.000194256	0.000186481		0.982514	0.965333	0.000305773	0.000100443		0.985608	0.971423	0.000207131	0.000197265		1.00079	1.00159	6.29356e-07	2.01952e-05		1.00499	1.01	2.48905e-05	5.45078e-05		1.00078
			3207.56					3161.45	3176.1	3158.94	3173.58	3210.13	3229.15	3209.54	3228.57	3222.86	3158.35		0.985625	0.971457	0.000206639	4.84521e-05		0.990191	0.980478	9.62194e-05	9.07485e-05		0.984843	0.969917	0.000229722	5.88994e-05		0.989406	0.978925	0.000112227	0.00010497		1.0008	1.0016	6.41413e-07	2.01276e-05		1.00673	1.01351	4.53119e-05	3.20585e-05		1.00062
								b3lyp-def2-svp-d3bj	b3lyp-def2-tzvp-d3bj	b3lyp-def2-svp-d4	b3lyp-def2-tzvp-d4	pbe0-def2-svp-d3bj	pbe0-def2-tzvp-d3bj	pbe0-def2-svp-d4	pbe0-def2-tzvp-d4	pbeh-3c	r2scan-3c
21	Propane, 2,2-dichloro-	CH3CCl2CH3	3660.69				https://doi.org/10.1016/j.jms.2014.12.024	3641.14	3653.78	3636.97	3649.52	3684.56	3703.18	3683.21	3701.77	3685.28	3635.76		0.994661	0.98935	2.85101e-05	4.59097e-06		0.998113	0.996229	3.56162e-06	2.56645e-06		0.993521	0.987083	4.19816e-05	1.14186e-06		0.99695	0.993909	9.30419e-06	7.28649e-06		1.00652	1.01309	4.25362e-05	1.45078e-06		1.01161	1.02335	0.000134723	7.16463e-07		1.00615
150			2457.87					2397.59	2417.89	2397.49	2417.79	2440.54	2462.49	2440.93	2462.94	2464.97	2399.45		0.975475	0.951551	0.000601492	0.000295411		0.983733	0.967731	0.000264613	0.000255547		0.975435	0.951473	0.000603447	0.000294283		0.983694	0.967654	0.00026589	0.000254717		0.992949	0.985947	4.97206e-05	0.000151218		1.00188	1.00377	3.53856e-06	0.000109257		0.993109
			2158.3					2112.61	2123.83	2112.2	2123.42	2152.89	2165.77	2153.15	2166.05	2165.26	2104.28		0.978834	0.958116	0.000448005	0.000190524		0.984032	0.968318	0.00025499	0.000246089		0.978642	0.957739	0.000456182	0.000193866		0.983842	0.967944	0.000261091	0.000250019		0.997495	0.994996	6.27478e-06	6.04468e-05		1.00346	1.00693	1.19727e-05	7.90855e-05		0.997613
12-atomics								b3lyp-def2-svp-d3bj	b3lyp-def2-tzvp-d3bj	b3lyp-def2-svp-d4	b3lyp-def2-tzvp-d4	pbe0-def2-svp-d3bj	pbe0-def2-tzvp-d3bj	pbe0-def2-svp-d4	pbe0-def2-tzvp-d4	pbeh-3c	r2scan-3c
1	1-Butene	CH2CHCH2CH3	22557.3				https://doi.org/10.1016/0022-2852(68)90180-X	22568.9	22777.8	22552	22760.8	22784.3	22920.3	22781.3	22918	22635.6	22678.8		1.00051	1.00102	2.62449e-07	6.46169e-05		1.00977	1.01964	9.5544e-05	0.000101268		0.999765	0.999531	5.51042e-08	5.41784e-05		1.00902	1.01813	8.14024e-05	8.79376e-05		1.01006	1.02022	0.00010121	2.23173e-05		1.01609	1.03244	0.000258959	1.28417e-05		1.00993
151			4156.28					4114.96	4160.68	4112.57	4158.25	4140.65	4188.75	4139.66	4187.7	4194.86	4165.2		0.990059	0.980217	9.8821e-05	6.21678e-06		1.00106	1.00212	1.12226e-06	1.81016e-06		0.989484	0.979078	0.000110588	8.99318e-06		1.00047	1.00095	2.24025e-07	6.81418e-07		0.99624	0.992493	1.41411e-05	8.1426e-05		1.00781	1.01569	6.10333e-05	2.11081e-05		0.996
			4056.21					4022.52	4063.76	4021.24	4062.44	4045.67	4088.12	4044.99	4087.39	4099.14	4062.55		0.991694	0.983457	6.89894e-05	7.15986e-07		1.00186	1.00372	3.46121e-06	4.60837e-06		0.991377	0.982829	7.43482e-05	1.19011e-06		1.00154	1.00308	2.36212e-06	3.57007e-06		0.997402	0.99481	6.75065e-06	6.18977e-05		1.00787	1.0158	6.19011e-05	2.06088e-05		0.997234
								b3lyp-def2-svp-d3bj	b3lyp-def2-tzvp-d3bj	b3lyp-def2-svp-d4	b3lyp-def2-tzvp-d4	pbe0-def2-svp-d3bj	pbe0-def2-tzvp-d3bj	pbe0-def2-svp-d4	pbe0-def2-tzvp-d4	pbeh-3c	r2scan-3c
3	Benzvalene	C6H6	7389.23	0.007			https://doi.org/10.1063/1.1677787	7406.84	7459.95	7406.7	7459.93	7467.29	7510.14	7467.52	7510.43	7532.43	7446.12		1.00238	1.00477	5.68037e-06	9.84776e-05		1.00957	1.01923	9.15901e-05	9.71951e-05		1.00236	1.00473	5.58564e-06	9.957e-05		1.00957	1.01923	9.15493e-05	9.8476e-05		1.01056	1.02124	0.000111585	2.72958e-05		1.01636	1.03299	0.000267743	1.48292e-05		1.01059
152			5275.92	0.004				5245.22	5294.06	5245.78	5294.89	5288.44	5330.92	5289.02	5331.64	5335.93	5292.09		0.994181	0.988397	3.38552e-05	2.75566e-06		1.00344	1.00689	1.18178e-05	1.38714e-05		0.994288	0.988609	3.26242e-05	3.39287e-06		1.0036	1.0072	1.29246e-05	1.55895e-05		1.00237	1.00475	5.62778e-06	8.54554e-06		1.01043	1.02096	0.000108689	4.05419e-06		1.00248
			3889.78	0.003				3870.54	3902.48	3870.98	3903.1	3906.95	3934.32	3907.37	3934.84	3943.81	3900.85		0.995055	0.990134	2.44554e-05	6.45095e-06		1.00327	1.00654	1.06628e-05	1.26172e-05		0.995166	0.990356	2.33663e-05	7.43396e-06		1.00342	1.00686	1.17199e-05	1.4263e-05		1.00441	1.00885	1.9479e-05	7.97188e-07		1.01145	1.02303	0.000131136	1.00017e-06		1.00452
								b3lyp-def2-svp-d3bj	b3lyp-def2-tzvp-d3bj	b3lyp-def2-svp-d4	b3lyp-def2-tzvp-d4	pbe0-def2-svp-d3bj	pbe0-def2-tzvp-d3bj	pbe0-def2-svp-d4	pbe0-def2-tzvp-d4	pbeh-3c	r2scan-3c
4	Dewar Benzene	C6H6	7770.39	0.012			https://doi.org/10.1016/0009-2614(74)89140-2	7817.04	7874.64	7821.6	7879.54	7873.74	7920.71	7876	7923.03	7936.03	7857.37		1.006	1.01204	3.60406e-05	0.000184168		1.01342	1.02701	0.000179989	0.000187842		1.00659	1.01322	4.34338e-05	0.00020271		1.01405	1.02829	0.000197299	0.000207454		1.0133	1.02678	0.000176884	6.31462e-05		1.01935	1.03907	0.000374251	4.61971e-05		1.01359
153			4479.3	0.008				4440.8	4472.28	4444.63	4476.49	4491.17	4518.93	4493.37	4521.31	4532.26	4477.1		0.991405	0.982885	7.38684e-05	1.2928e-06		0.998434	0.996871	2.45154e-06	1.63953e-06		0.99226	0.984579	5.99109e-05	4.07604e-08		0.999373	0.998746	3.93531e-07	7.5922e-08		1.00265	1.00531	7.02158e-06	7.00772e-06		1.00885	1.01777	7.82647e-05	1.27644e-05		1.00314
			3488.95	0.032				3462.54	3489.19	3465.58	3492.54	3499.56	3523.78	3501.29	3525.65	3538.26	3492.08		0.992432	0.984921	5.72801e-05	1.0605e-08		1.00007	1.00014	5.1176e-09	1.27668e-07		0.993304	0.986653	4.48368e-05	7.22887e-07		1.00103	1.00206	1.06106e-06	1.91114e-06		1.00304	1.00609	9.25457e-06	5.09394e-06		1.00998	1.02007	9.969e-05	5.99753e-06		1.00354
								b3lyp-def2-svp-d3bj	b3lyp-def2-tzvp-d3bj	b3lyp-def2-svp-d4	b3lyp-def2-tzvp-d4	pbe0-def2-svp-d3bj	pbe0-def2-tzvp-d3bj	pbe0-def2-svp-d4	pbe0-def2-tzvp-d4	pbeh-3c	r2scan-3c
5	Benzene	C6H6	5689.14	0.006			https://doi.org/10.1016/0009-2614(84)80357-7	5666.84	5734.53	5667.05	5734.98	5695.82	5758.23	5696.14	5758.67	5759.27	5719.52		0.99608	0.992176	1.53632e-05	1.2768e-05		1.00798	1.01602	6.36548e-05	6.83338e-05		0.996116	0.992248	1.5082e-05	1.35724e-05		1.00806	1.01618	6.49111e-05	7.07547e-05		1.00117	1.00235	1.37846e-06	1.69346e-05		1.01214	1.02443	0.000147466	1.00162e-07		1.00123
154	d1		5323.93	0.006				5666.02	5733.57	5666.22	5734.01	5694.98	5757.24	5695.3	5757.68	5757.42	5719.19		1.06425	1.13264	0.00412863	0.00522152		1.07694	1.1598	0.00592	0.00596745		1.06429	1.13272	0.00413355	0.00523861		1.07702	1.15998	0.00593284	0.00599138		1.06969	1.14425	0.00485737	0.00410158		1.08139	1.1694	0.00662415	0.0046344		1.06975
			2749.67	0.006				2833.22	2867.02	2833.32	2867.25	2847.7	2878.87	2847.86	2879.09	2879.17	2859.68		1.03038	1.06169	0.000923104	0.00145416		1.04268	1.08718	0.00182142	0.00184694		1.03042	1.06176	0.000925362	0.00146291		1.04276	1.08735	0.00182833	0.00185986		1.03565	1.07257	0.00127098	0.000910797		1.04699	1.09618	0.00220762	0.00116256		1.03571
								b3lyp-def2-svp-d3bj	b3lyp-def2-tzvp-d3bj	b3lyp-def2-svp-d4	b3lyp-def2-tzvp-d4	pbe0-def2-svp-d3bj	pbe0-def2-tzvp-d3bj	pbe0-def2-svp-d4	pbe0-def2-tzvp-d4	pbeh-3c	r2scan-3c
7	Fluorobenzene	C6H5F	5663.71	0.00034			https://doi.org/10.1016/j.jms.2005.02.006	5650.23	5710.61	5650.16	5710.8	5681.04	5734.79	5681.19	5735.09	5740.83	5690.57		0.99762	0.995245	5.66633e-06	2.62554e-05		1.00828	1.01663	6.85461e-05	7.33999e-05		0.997607	0.995219	5.72715e-06	2.68925e-05		1.00831	1.0167	6.91229e-05	7.51506e-05		1.00306	1.00613	9.35768e-06	5.01834e-06		1.01255	1.02526	0.000157485	7.09604e-09		1.00309
155			2570.65	5.6e-05				2555.54	2574.74	2556.2	2575.52	2574.3	2594.08	2574.72	2594.58	2591.12	2572.72		0.994121	0.988277	3.45599e-05	2.55782e-06		1.00159	1.00318	2.52368e-06	3.51492e-06		0.994376	0.988783	3.16322e-05	3.72547e-06		1.0019	1.00379	3.59141e-06	5.05247e-06		1.00142	1.00284	2.00788e-06	1.50042e-05		1.00911	1.01831	8.30366e-05	1.09581e-05		1.00158
			1767.91	5.2e-05				1759.66	1774.62	1759.97	1775.01	1771.54	1786.14	1771.76	1786.4	1785.32	1771.72		0.995333	0.990689	2.17771e-05	7.95586e-06		1.00379	1.0076	1.43755e-05	1.66328e-05		0.995505	0.99103	2.02059e-05	9.41186e-06		1.00401	1.00804	1.61118e-05	1.90739e-05		1.00205	1.00411	4.21293e-06	1.05063e-05		1.01031	1.02072	0.000106242	4.53717e-06		1.00218
								b3lyp-def2-svp-d3bj	b3lyp-def2-tzvp-d3bj	b3lyp-def2-svp-d4	b3lyp-def2-tzvp-d4	pbe0-def2-svp-d3bj	pbe0-def2-tzvp-d3bj	pbe0-def2-svp-d4	pbe0-def2-tzvp-d4	pbeh-3c	r2scan-3c
8	1,4-difluorobenzene	C6H4F2	5637.6	0.2			https://doi.org/10.1080/01442350500161453	5635.17	5689	5634.96	5689.11	5667.88	5714.08	5667.95	5714.3	5725.11	5661.41		0.99957	0.999139	1.85268e-07	5.02489e-05		1.00912	1.01832	8.3138e-05	8.84795e-05		0.999531	0.999062	2.20067e-07	5.07577e-05		1.00914	1.01836	8.34754e-05	9.00925e-05		1.00537	1.01077	2.88538e-05	3.61919e-09		1.01357	1.02732	0.000184062	1.18671e-06		1.00538
156			1428	0.1				1417.36	1426.4	1417.85	1426.97	1428.56	1438.42	1428.86	1438.77	1435.33	1426.68		0.992551	0.985157	5.54894e-05	2.94175e-10		0.998881	0.997763	1.25224e-06	6.949e-07		0.992894	0.985838	5.04996e-05	1.90822e-07		0.999276	0.998553	5.23697e-07	1.38327e-07		1.00039	1.00078	1.53777e-07	2.39411e-05		1.0073	1.01465	5.32408e-05	2.60483e-05		1.0006
			1139.4	0.1				1132.51	1140.46	1132.82	1140.82	1140.98	1149.14	1141.18	1149.37	1147.61	1139.52		0.993955	0.987947	3.65416e-05	2.05027e-06		1.00093	1.00185	8.58783e-07	1.47069e-06		0.994222	0.988477	3.339e-05	3.14998e-06		1.00125	1.0025	1.55529e-06	2.55857e-06		1.00139	1.00278	1.92678e-06	1.52278e-05		1.00855	1.01718	7.3122e-05	1.49358e-05		1.00156
								b3lyp-def2-svp-d3bj	b3lyp-def2-tzvp-d3bj	b3lyp-def2-svp-d4	b3lyp-def2-tzvp-d4	pbe0-def2-svp-d3bj	pbe0-def2-tzvp-d3bj	pbe0-def2-svp-d4	pbe0-def2-tzvp-d4	pbeh-3c	r2scan-3c
11	chlorobenzene	C6H5Cl	5672.95				https://doi.org/10.1063/1.1734567	5654.04	5722.23	5654.71	5723.3	5682.73	5745.24	5682.91	5746.02	5746.72	5700.57		0.996667	0.993345	1.1109e-05	1.73408e-05		1.00869	1.01745	7.54525e-05	8.05429e-05		0.996785	0.993581	1.03351e-05	1.89911e-05		1.00888	1.01783	7.87753e-05	8.52053e-05		1.00172	1.00345	2.97284e-06	1.27303e-05		1.01274	1.02565	0.000162382	7.58955e-08		1.00176
157			1576.77					1558.76	1573.42	1559.33	1574.14	1575.19	1589.89	1575.51	1590.41	1589.03	1567.36		0.988578	0.977287	0.000130454	1.58821e-05		0.99787	0.995745	4.53564e-06	3.40242e-06		0.988934	0.97799	0.000122461	1.2625e-05		0.998327	0.996656	2.79991e-06	1.74737e-06		0.998994	0.997988	1.01271e-06	3.94893e-05		1.00832	1.01671	6.91979e-05	1.67644e-05		0.999197
			1233.67					1221.9	1234.09	1222.27	1234.58	1233.32	1245.28	1233.53	1245.64	1244.83	1229.35		0.990457	0.981005	9.107e-05	4.3787e-06		1.00033	1.00067	1.12076e-07	3.85171e-07		0.990761	0.981608	8.53508e-05	2.92961e-06		1.00073	1.00147	5.38899e-07	1.18017e-06		0.999718	0.999436	7.95073e-08	3.09527e-05		1.00941	1.01891	8.85585e-05	9.09539e-06		0.999884
								b3lyp-def2-svp-d3bj	b3lyp-def2-tzvp-d3bj	b3lyp-def2-svp-d4	b3lyp-def2-tzvp-d4	pbe0-def2-svp-d3bj	pbe0-def2-tzvp-d3bj	pbe0-def2-svp-d4	pbe0-def2-tzvp-d4	pbeh-3c	r2scan-3c
13	1,2-dichlorobenzene	C6H4Cl2	1930.08	4.3e-05			https://doi.org/10.1016/j.jms.2020.111380	1910.08	1915.9	1910.93	1916.91	1937.48	1940.12	1938.31	1941.24	1960.92	1913.56		0.989638	0.979383	0.000107371	8.51251e-06		0.992657	0.985369	5.39152e-05	4.98301e-05		0.990081	0.980261	9.83815e-05	5.74548e-06		0.993176	0.986398	4.6572e-05	4.19227e-05		1.00383	1.00768	1.46939e-05	2.16099e-06		1.0052	1.01044	2.70845e-05	5.1414e-05		1.00427
158			1431.17	2.5e-05				1414.99	1432.43	1415.64	1433.28	1428.15	1446.04	1428.52	1446.54	1441.34	1424.85		0.988696	0.977519	0.00012779	1.49548e-05		1.00088	1.00176	7.73045e-07	1.35776e-06		0.989149	0.978416	0.000117738	1.11289e-05		1.00148	1.00296	2.18665e-06	3.3535e-06		0.997893	0.99579	4.44019e-06	5.44508e-05		1.01039	1.02089	0.000108001	4.18676e-06		0.998151
			821.674	2.1e-05				812.837	819.63	813.207	820.094	822.138	828.518	822.411	828.886	830.727	816.717		0.989246	0.978607	0.000115652	1.09743e-05		0.997512	0.995031	6.18857e-06	4.85165e-06		0.989695	0.979497	0.000106189	7.76173e-06		0.998077	0.996158	3.69785e-06	2.4701e-06		1.00056	1.00113	3.18623e-07	2.2293e-05		1.00833	1.01673	6.93704e-05	1.66807e-05		1.0009
								b3lyp-d3bj-def2-svp	b3lyp-d3bj-def2-tzvp	b3lyp-d4-def2-svp	b3lyp-d4-def2-tzvp	pbe0-d3bj-def2-svp	pbe0-d3bj-def2-tzvp	pbe0-d4-def2-svp	pbe0-d4-def2-tzvp	pbeh-3c	r2scan-3c
14	Uracil	C4H4N2O2	3883.87	6e-05			https://doi.org/10.1051/0004-6361:20065777	3873.88	3902.97	3873.8	3902.96	3902.86	3930.04	3902.96	3929.62	3937.4	3892.39		0.997428	0.994863	6.61423e-06	2.43162e-05		1.00492	1.00986	2.41726e-05	2.70787e-05		0.997405	0.994818	6.73167e-06	2.4829e-05		1.00491	1.00985	2.41541e-05	2.77561e-05		1.00489	1.0098	2.39095e-05	1.75671e-07		1.01189	1.02391	0.000141281	3.25724e-07		1.00491
159			2023.73	4.5e-05				2009.57	2025.05	2009.75	2025.27	2026.3	2041.5	2026.49	2041.62	2041.99	2012.09		0.993	0.986049	4.89985e-05	2.20677e-07		1.00065	1.00131	4.26727e-07	8.82056e-07		0.993089	0.986225	4.77686e-05	4.00858e-07		1.00076	1.00152	5.76016e-07	1.23482e-06		1.00127	1.00254	1.61528e-06	1.61509e-05		1.00878	1.01763	7.70639e-05	1.32498e-05		1.00136
			1330.93	3.3e-05				1323.17	1333.28	1323.24	1333.37	1333.81	1343.57	1333.9	1343.57	1344.64	1326.42		0.994174	0.988382	3.39436e-05	2.73032e-06		1.00177	1.00354	3.12707e-06	4.22141e-06		0.994224	0.988482	3.33573e-05	3.16011e-06		1.00184	1.00368	3.37599e-06	4.79625e-06		1.00217	1.00434	4.69267e-06	9.78579e-06		1.0095	1.01908	9.01966e-05	8.58658e-06		1.00224
13-atomics								b3lyp-def2-svp-d3bj	b3lyp-def2-tzvp-d3bj	b3lyp-def2-svp-d4	b3lyp-def2-tzvp-d4	pbe0-def2-svp-d3bj	pbe0-def2-tzvp-d3bj	pbe0-def2-svp-d4	pbe0-def2-tzvp-d4	pbeh-3c	r2scan-3c
1	1,4-Pentadiene	C5H8	14612				https://doi.org/10.1021/jp3124023	14287	14594.1	14237.5	14539.6	14503.4	14780.6	14480.4	14759.3	14238.8	14386		0.977756	0.956006	0.000494815	0.000221696		0.998774	0.997549	1.5042e-06	8.85594e-07		0.974373	0.949402	0.000656764	0.00033215		0.995049	0.990122	2.45129e-05	2.11673e-05		0.992566	0.985188	5.52604e-05	0.000160719		1.01154	1.02321	0.000133096	8.38772e-07		0.990994
160			2537.75					2531.09	2550	2533.83	2552.97	2536.59	2555.7	2537.99	2556.93	2592.26	2561.85		0.997377	0.99476	6.88206e-06	2.38067e-05		1.00482	1.00967	2.32794e-05	2.61326e-05		0.998453	0.996908	2.39327e-06	3.64617e-05		1.006	1.01203	3.59779e-05	4.03513e-05		0.999543	0.999087	2.08667e-07	3.2918e-05		1.00707	1.0142	5.00261e-05	2.83526e-05		1.00009
			2430.62					2417.69	2441.62	2418.79	2442.9	2427.53	2451.33	2428.24	2451.97	2470.58	2450.47		0.994679	0.989387	2.83102e-05	4.67232e-06		1.00453	1.00907	2.04958e-05	2.31772e-05		0.995133	0.990289	2.36913e-05	7.25103e-06		1.00505	1.01013	2.55452e-05	2.92465e-05		0.998728	0.997457	1.6185e-06	4.28831e-05		1.00852	1.01712	7.26315e-05	1.5156e-05		0.999019
								b3lyp-d3bj-def2-svp	b3lyp-d3bj-def2-tzvp	b3lyp-d4-def2-svp	b3lyp-d4-def2-tzvp	pbe0-d3bj-def2-svp	pbe0-d3bj-def2-tzvp	pbe0-d4-def2-svp	pbe0-d4-def2-tzvp	pbeh-3c	r2scan-3c
5	Furan, tetrahydro-	C4H8O	7096.73	0.012			https://doi.org/10.1023/A:1012448618502	7138.24	7136.29	7133.61	7130.76	7224.5	7227.32	7223.87	7225.63	7187.52	7125.12		1.00585	1.01173	3.42198e-05	0.000179991		1.00557	1.01118	3.10795e-05	3.43658e-05		1.0052	1.01042	2.7011e-05	0.000164707		1.0048	1.00961	2.29944e-05	2.65116e-05		1.018	1.03633	0.000324129	0.000159401		1.0184	1.03714	0.000338617	3.43919e-05		1.01792
161			6976.34	0.017				6914.35	6948.62	6913.51	6947.2	6984.37	7009.55	6984.02	7009.51	7075.84	6919.31		0.991114	0.982308	7.8954e-05	2.04529e-06		0.996027	0.992069	1.57878e-05	1.36071e-05		0.990994	0.98207	8.10991e-05	2.18093e-06		0.995823	0.991663	1.74498e-05	1.46441e-05		1.00115	1.0023	1.3238e-06	1.71276e-05		1.00476	1.00954	2.26671e-05	5.78843e-05		1.0011
			4008.2	0.025				3986.11	3988.22	3983.56	3984.93	4035.77	4041.39	4035.78	4040.51	4047.81	3991.8		0.99449	0.98901	3.0363e-05	3.88325e-06		0.995014	0.990053	2.48603e-05	2.21059e-05		0.993852	0.987742	3.77967e-05	1.96704e-06		0.994195	0.988423	3.37028e-05	2.9762e-05		1.00688	1.0138	4.73025e-05	2.42833e-06		1.00828	1.01663	6.85783e-05	1.70677e-05		1.00688
								b3lyp-def2-svp-d3bj	b3lyp-def2-tzvp-d3bj	b3lyp-def2-svp-d4	b3lyp-def2-tzvp-d4	pbe0-def2-svp-d3bj	pbe0-def2-tzvp-d3bj	pbe0-def2-svp-d4	pbe0-def2-tzvp-d4	pbeh-3c	r2scan-3c
6	2-Butanone	CH3COCH2CH3	9544.63				https://doi.org/10.1016/0022-2852(69)90010-1	9533.53	9582.78	9537.67	9587.37	9607.82	9636.23	9609.97	9638.48	9565.22	9526.51		0.998838	0.997676	1.35139e-06	4.03361e-05		1.004	1.00801	1.59734e-05	1.8349e-05		0.999271	0.998542	5.31706e-07	4.70926e-05		1.00448	1.00898	2.00481e-05	2.33394e-05		1.00662	1.01328	4.38269e-05	1.69566e-06		1.0096	1.01929	9.21109e-05	8.01608e-06		1.00685
162	trans		3596.8					3582.67	3593.69	3580	3590.78	3618.05	3632.36	3617.13	3631.41	3614.2	3603.81		0.996071	0.992158	1.5435e-05	1.27022e-05		0.999137	0.998274	7.45578e-07	3.34046e-07		0.99533	0.990682	2.18096e-05	8.36116e-06		0.998326	0.996654	2.80323e-06	1.74999e-06		1.00591	1.01185	3.49192e-05	3.54013e-07		1.00989	1.01987	9.77195e-05	6.48688e-06		1.00565
			2746.51					2737.31	2746.75	2736.04	2745.41	2764.2	2773.9	2763.83	2773.51	2760.01	2750.95		0.996649	0.993309	1.12309e-05	1.7188e-05		1.00009	1.00018	7.7818e-09	1.39867e-07		0.996188	0.99239	1.4532e-05	1.41082e-05		0.999598	0.999197	1.61453e-07	2.49525e-09		1.00644	1.01293	4.15056e-05	1.26656e-06		1.00997	1.02004	9.94265e-05	6.06159e-06		1.00631
								b3lyp-def2-svp-d3bj	b3lyp-def2-tzvp-d3bj	b3lyp-def2-svp-d4	b3lyp-def2-tzvp-d4	pbe0-def2-svp-d3bj	pbe0-def2-tzvp-d3bj	pbe0-def2-svp-d4	pbe0-def2-tzvp-d4	pbeh-3c	r2scan-3c
7	Propanal, 2-methyl-	CHOCH(CH3)CH3	7494.62	0.02			https://doi.org/10.1515/zna-1986-0305	7655.32	7714.48	7645.37	7704.29	7718.17	7785.07	7714.43	7781.21	7775.22	7711.62		1.02144	1.04334	0.00045974	0.000848274		1.02934	1.05953	0.000860565	0.000877908		1.02011	1.04063	0.000404611	0.000776451		1.02798	1.05674	0.00078269	0.000803068		1.02983	1.06055	0.000889743	0.000594771		1.03876	1.07901	0.00150195	0.000674305		1.02933
163	gauche		4107.51	0.02				3703.81	3729.08	3703.7	3729	3736.74	3759.39	3736.99	3759.67	3743.44	3728.03		0.901718	0.813095	0.00965944	0.00837215		0.907869	0.824226	0.00848815	0.00844042		0.90169	0.813045	0.00966483	0.00836486		0.907849	0.82419	0.00849174	0.00843295		0.909733	0.827614	0.00814817	0.00903894		0.915247	0.837677	0.00718303	0.00921984		0.909794
			2980.7	0.02				2797.01	2816.15	2795.71	2814.84	2822.7	2842.37	2822.39	2842.05	2830.82	2819.1		0.938374	0.880545	0.00379782	0.00297764		0.944797	0.89264	0.00304743	0.00301769		0.937937	0.879725	0.00385185	0.00301815		0.944354	0.891804	0.00309651	0.00305962		0.946992	0.896794	0.00280987	0.0033653		0.95359	0.909334	0.00215388	0.00338132		0.946887
								b3lyp-def2-svp-d3bj	b3lyp-def2-tzvp-d3bj	b3lyp-def2-svp-d4	b3lyp-def2-tzvp-d4	pbe0-def2-svp-d3bj	pbe0-def2-tzvp-d3bj	pbe0-def2-svp-d4	pbe0-def2-tzvp-d4	pbeh-3c	r2scan-3c
8	Cyclobutanol	C4H8O	10119.7	0.1			https://doi.org/10.1016/0584-8539(78)80035-X	10088.5	10143.9	10082.5	10138.1	10221.4	10270.9	10219.7	10269.2	10257.4	10136.2		0.996918	0.993846	9.4965e-06	1.95142e-05		1.0024	1.0048	5.75179e-06	7.20773e-06		0.996325	0.992663	1.35086e-05	1.51616e-05		1.00182	1.00365	3.31548e-06	4.72405e-06		1.01005	1.0202	0.000100999	2.2219e-05		1.01494	1.0301	0.000223225	5.98398e-06		1.00988
164			4282.93	0.04				4286.47	4287.11	4285.51	4286.19	4328.88	4327.25	4328.68	4327.04	4325.11	4272.34		1.00083	1.00165	6.82462e-07	6.97999e-05		1.00098	1.00195	9.52185e-07	1.59221e-06		1.0006	1.00121	3.64176e-07	6.7325e-05		1.00076	1.00152	5.78702e-07	1.23876e-06		1.01073	1.02157	0.000115126	2.90519e-05		1.01035	1.0208	0.000107094	4.36536e-06		1.01068
			3421.04	0.04				3419.75	3423.15	3418.43	3421.84	3457.69	3459.71	3457.34	3459.35	3451.82	3415.89		0.999623	0.999246	1.42012e-07	5.10172e-05		1.00062	1.00123	3.80136e-07	8.14463e-07		0.999238	0.998477	5.80236e-07	4.66435e-05		1.00024	1.00047	5.53315e-08	3.44934e-07		1.01071	1.02154	0.000114801	2.88892e-05		1.0113	1.02274	0.000127791	1.31156e-06		1.01061
14-atomics								b3lyp-def2-svp-d3bj	b3lyp-def2-tzvp-d3bj	b3lyp-def2-svp-d4	b3lyp-def2-tzvp-d4	pbe0-def2-svp-d3bj	pbe0-def2-tzvp-d3bj	pbe0-def2-svp-d4	pbe0-def2-tzvp-d4	pbeh-3c	r2scan-3c
3	Pyrrolidine	C4H9N	6834.54	0.003			https://doi.org/10.1016/0022-2852(84)90094-8	6838.31	6852.78	6834.3	6848.55	6912.89	6929.93	6911.43	6928.46	6939.33	6840.76		1.00055	1.0011	3.04345e-07	6.52563e-05		1.00267	1.00535	7.12608e-06	8.73784e-06		0.999966	0.999932	1.15512e-09	5.71971e-05		1.00205	1.0041	4.20242e-06	5.77298e-06		1.01146	1.02306	0.000131446	3.74711e-05		1.01396	1.02811	0.00019482	2.1768e-06		1.01125
165			6677.84	0.011				6661.92	6701.14	6659.76	6699.04	6725.82	6759.42	6725.16	6758.82	6747.98	6674.12		0.997615	0.995236	5.6864e-06	2.62119e-05		1.00349	1.00699	1.21655e-05	1.4248e-05		0.997292	0.994591	7.33509e-06	2.36995e-05		1.00317	1.00636	1.00741e-05	1.24404e-05		1.00718	1.01442	5.16096e-05	3.47073e-06		1.01222	1.02458	0.000149212	6.03614e-08		1.00709
			3868.06	0.001				3880.66	3884.86	3877.33	3881.21	3924.96	3933.75	3923.8	3932.54	3928.14	3887.4		1.00326	1.00652	1.06085e-05	0.000116724		1.00434	1.0087	1.88482e-05	2.14224e-05		1.0024	1.0048	5.73683e-06	0.00010021		1.0034	1.00681	1.15584e-05	1.40848e-05		1.01471	1.02964	0.000216386	8.74095e-05		1.01698	1.03425	0.000288414	1.99195e-05		1.01441
								b3lyp-def2-svp-d3bj	b3lyp-def2-tzvp-d3bj	b3lyp-def2-svp-d4	b3lyp-def2-tzvp-d4	pbe0-def2-svp-d3bj	pbe0-def2-tzvp-d3bj	pbe0-def2-svp-d4	pbe0-def2-tzvp-d4	pbeh-3c	r2scan-3c
5	Methyl cyclopropyl ketone	C5H8O	7204.35	0.81			https://doi.org/10.1016/0022-2852(72)90124-5	7186.43	7231.54	7188.75	7233.01	7243.64	7275.24	7244.42	7276.14	7230.36	7210.54		0.997513	0.995032	6.1862e-06	2.51642e-05		1.00377	1.00756	1.4241e-05	1.64881e-05		0.997834	0.995673	4.6912e-06	2.93195e-05		1.00398	1.00797	1.58311e-05	1.87682e-05		1.00545	1.01094	2.97393e-05	2.00296e-08		1.00984	1.01978	9.68265e-05	6.71665e-06		1.00556
166			2630.9	0.12				2615.99	2627.57	2614.27	2626.19	2644.73	2658.45	2644.32	2658.05	2638.41	2638.25		0.994334	0.9887	3.21059e-05	3.28871e-06		0.998736	0.997473	1.59788e-06	9.5783e-07		0.99368	0.987401	3.99367e-05	1.51183e-06		0.998211	0.996425	3.20172e-06	2.06773e-06		1.00526	1.01054	2.76501e-05	2.7537e-09		1.01047	1.02105	0.00010966	3.87144e-06		1.0051
			2301.14	0.07				2287.36	2296.96	2286.48	2296.2	2311.69	2322.19	2311.51	2322.02	2303.45	2302.77		0.994012	0.98806	3.58542e-05	2.2184e-06		0.998182	0.996367	3.30552e-06	2.34973e-06		0.993631	0.987303	4.05618e-05	1.39223e-06		0.997852	0.995708	4.61577e-06	3.22989e-06		1.00459	1.00919	2.10245e-05	5.21309e-07		1.00915	1.01838	8.36804e-05	1.07287e-05		1.0045
								b3lyp-d3bj-def2-svp	b3lyp-d3bj-def2-tzvp	b3lyp-d4-def2-svp	b3lyp-d4-def2-tzvp	pbe0-d3bj-def2-svp	pbe0-d3bj-def2-tzvp	pbe0-d4-def2-svp	pbe0-d4-def2-tzvp	pbeh-3c	r2scan-3c
6	benzaldehyde	C6H5CHO	5234.28				https://doi.org/10.1063/1.1673561	5214.67	5279.84	5214.8	5280.25	5238.63	5298.21	5238.81	5298.53	5304.56	5256.34		0.996253	0.992519	1.40427e-05	1.40382e-05		1.0087	1.01748	7.57575e-05	8.08581e-05		0.996278	0.992569	1.38564e-05	1.4795e-05		1.00878	1.01764	7.71378e-05	8.35013e-05		1.00083	1.00166	6.89247e-07	1.98668e-05		1.01221	1.02458	0.000149167	6.12623e-08		1.00086
167			1564.24					1558.48	1569.72	1558.88	1570.22	1569.22	1579.62	1569.57	1580.03	1577.51	1569.35		0.996318	0.992649	1.3559e-05	1.45341e-05		1.00351	1.00702	1.22859e-05	1.43783e-05		0.996574	0.99316	1.17378e-05	1.71815e-05		1.00382	1.00766	1.46041e-05	1.74296e-05		1.00318	1.00637	1.0113e-05	4.49334e-06		1.00983	1.01976	9.66857e-05	6.75334e-06		1.00341
			1204.7					1199.88	1209.99	1200.12	1210.3	1207.51	1216.83	1207.73	1217.09	1215.91	1208.53		0.995999	0.992015	1.60052e-05	1.2191e-05		1.00439	1.0088	1.92771e-05	2.18796e-05		0.996202	0.992419	1.44228e-05	1.4217e-05		1.00465	1.00933	2.16474e-05	2.50632e-05		1.00233	1.00467	5.44329e-06	8.77509e-06		1.01007	1.02025	0.000101444	5.58202e-06		1.00252
								b3lyp-d3bj-def2-svp	b3lyp-d3bj-def2-tzvp	b3lyp-d4-def2-svp	b3lyp-d4-def2-tzvp	pbe0-d3bj-def2-svp	pbe0-d3bj-def2-tzvp	pbe0-d4-def2-svp	pbe0-d4-def2-tzvp	pbeh-3c	r2scan-3c
7	Nitrobenzene	C6H5NO2	3968.08	0.009			https://doi.org/10.1016/0022-2860(71)90012-3	3966.93	4002.41	3967.1	4002.74	3997.15	4027.87	3997.32	4028.11	4043.69	3983.87		0.999711	0.999421	8.37667e-08	5.22831e-05		1.00865	1.01738	7.4853e-05	7.99233e-05		0.999753	0.999505	6.1189e-08	5.39913e-05		1.00874	1.01755	7.63146e-05	8.26444e-05		1.00733	1.01471	5.36809e-05	4.01995e-06		1.01507	1.03036	0.000227031	6.61268e-06		1.00737
168			1286.92	0.0006				1282.43	1290.23	1282.95	1290.84	1294.89	1302.81	1295.28	1303.26	1302.34	1287.98		0.996511	0.993034	1.2172e-05	1.60578e-05		1.00257	1.00515	6.6022e-06	8.15649e-06		0.996917	0.993844	9.50208e-06	2.01705e-05		1.00304	1.0061	9.26932e-06	1.15439e-05		1.00619	1.01242	3.83067e-05	7.63009e-07		1.01235	1.02485	0.00015253	1.26146e-08		1.0065
			972.66	0.0005				969.131	975.698	969.44	976.068	978.046	984.407	978.284	984.675	985.077	973.311		0.996371	0.992755	1.31686e-05	1.49472e-05		1.00312	1.00626	9.7549e-06	1.16276e-05		0.996689	0.993388	1.09658e-05	1.81519e-05		1.0035	1.00702	1.22717e-05	1.48713e-05		1.00554	1.0111	3.06521e-05	5.02408e-08		1.01208	1.0243	0.000145858	1.45971e-07		1.00578
15-atomics								b3lyp-def2-svp-d3bj	b3lyp-def2-tzvp-d3bj	b3lyp-def2-svp-d4	b3lyp-def2-tzvp-d4	pbe0-def2-svp-d3bj	pbe0-def2-tzvp-d3bj	pbe0-def2-svp-d4	pbe0-def2-tzvp-d4	pbeh-3c	r2scan-3c
3	Quadricyclane	C7H8	4408.22	0.0006			https://doi.org/10.1016/0022-2852(89)90219-1	4403.61	4433.52	4402.28	4432.15	4443.95	4469.65	4443.52	4469.21	4474.18	4431.72		0.998954	0.997908	1.09482e-06	4.18364e-05		1.00574	1.01151	3.29526e-05	3.63347e-05		0.998653	0.997308	1.81419e-06	3.89372e-05		1.00543	1.01089	2.94718e-05	3.34397e-05		1.00811	1.01628	6.56959e-05	7.7253e-06		1.01394	1.02806	0.000194189	2.1114e-06		1.00801
169			4345.51	0.0006				4348.92	4371.98	4348.1	4371.14	4391.3	4410.22	4391.09	4410.02	4420.71	4360.36		1.00078	1.00157	6.14445e-07	6.90905e-05		1.00609	1.01222	3.70845e-05	4.06686e-05		1.0006	1.00119	3.55141e-07	6.72004e-05		1.0059	1.01183	3.47866e-05	3.90887e-05		1.01054	1.02118	0.00011101	2.70133e-05		1.01489	1.03	0.000221721	5.74285e-06		1.01049
			3256.29	0.0006				3246.69	3267.71	3245.72	3266.71	3279.03	3296.88	3278.71	3296.55	3298.69	3263.65		0.997053	0.994116	8.68235e-06	2.07349e-05		1.00351	1.00703	1.23097e-05	1.4404e-05		0.996754	0.993518	1.05386e-05	1.87155e-05		1.0032	1.00641	1.02314e-05	1.26151e-05		1.00698	1.01402	4.87692e-05	2.76745e-06		1.01246	1.02508	0.000155354	0		1.00689
								b3lyp-def2-svp-d3bj	b3lyp-def2-tzvp-d3bj	b3lyp-def2-svp-d4	b3lyp-def2-tzvp-d4	pbe0-def2-svp-d3bj	pbe0-def2-tzvp-d3bj	pbe0-def2-svp-d4	pbe0-def2-tzvp-d4	pbeh-3c	r2scan-3c
4	Norbornadiene	C7H8	4273.63	0.001			https://doi.org/10.1016/0022-2852(88)90298-6	4275.07	4305.35	4276.03	4306.56	4312.53	4340.44	4313.4	4341.43	4339.82	4293.82		1.00034	1.00067	1.13186e-07	6.17996e-05		1.00742	1.0149	5.51134e-05	5.94704e-05		1.00056	1.00113	3.16373e-07	6.66487e-05		1.00771	1.01547	5.93914e-05	6.49845e-05		1.0091	1.01829	8.2866e-05	1.42276e-05		1.01563	1.03151	0.000244375	9.79366e-06		1.00931
170			3610.3	0.001				3589.28	3612.11	3591.22	3614.48	3628.54	3649.54	3630.03	3651.23	3648.63	3612.22		0.994178	0.988389	3.3898e-05	2.74337e-06		1.0005	1.001	2.51387e-07	6.19804e-07		0.994715	0.989458	2.79292e-05	5.16274e-06		1.00116	1.00232	1.33829e-06	2.27785e-06		1.00505	1.01013	2.55125e-05	6.69442e-08		1.01087	1.02186	0.000118135	2.48177e-06		1.00546
			3186.44	0.001				3169.06	3194.38	3170.45	3196.09	3198.43	3220.93	3199.48	3222.13	3224.22	3191.44		0.994546	0.989123	2.97415e-05	4.11161e-06		1.00249	1.00499	6.20778e-06	7.7173e-06		0.994984	0.989994	2.51575e-05	6.46835e-06		1.00303	1.00607	9.16836e-06	1.14311e-05		1.00376	1.00754	1.41646e-05	2.36956e-06		1.01083	1.02177	0.000117204	2.61719e-06		1.00409
17-atomics								b3lyp-def2-svp-d3bj	b3lyp-def2-tzvp-d3bj	b3lyp-def2-svp-d4	b3lyp-def2-tzvp-d4	pbe0-def2-svp-d3bj	pbe0-def2-tzvp-d3bj	pbe0-def2-svp-d4	pbe0-def2-tzvp-d4	pbeh-3c	r2scan-3c
3	Norbornene	C7H10	3923.77	0.066			https://doi.org/10.1016/0022-2860(77)80041-0	3923.09	3946.82	3922.89	3946.73	3956.44	3976.56	3956.59	3976.76	3976.98	3934.12		0.999825	0.999651	3.0522e-08	5.3968e-05		1.00587	1.01178	3.44895e-05	3.79481e-05		0.999774	0.999548	5.09968e-08	5.43108e-05		1.00585	1.01174	3.42276e-05	3.84958e-05		1.00832	1.01672	6.92986e-05	8.98539e-06		1.01345	1.02709	0.000181	9.5539e-07		1.00836
172			3432.37	0.009				3415.94	3438.14	3415.78	3438.18	3453.27	3475.75	3453.66	3476.25	3468.04	3439.36		0.995215	0.990452	2.28999e-05	7.29501e-06		1.00168	1.00337	2.83026e-06	3.87526e-06		0.995167	0.990357	2.33612e-05	7.43687e-06		1.00169	1.00339	2.86382e-06	4.18153e-06		1.00609	1.01222	3.70832e-05	5.99679e-07		1.01264	1.02544	0.000159757	3.00491e-08		1.0062
			3014.93	0.009				3001.45	3022.94	3001.1	3022.75	3033.91	3055.68	3034.14	3056	3048.54	3024.2		0.99553	0.991079	1.99839e-05	9.11044e-06		1.00266	1.00532	7.06908e-06	8.67469e-06		0.995414	0.990848	2.1035e-05	8.85588e-06		1.00259	1.0052	6.73261e-06	8.68859e-06		1.0063	1.01264	3.96643e-05	9.63636e-07		1.01352	1.02722	0.00018273	1.08327e-06		1.00637
								b3lyp-def2-svp-d3bj	b3lyp-def2-tzvp-d3bj	b3lyp-def2-svp-d4	b3lyp-def2-tzvp-d4	pbe0-def2-svp-d3bj	pbe0-def2-tzvp-d3bj	pbe0-def2-svp-d4	pbe0-def2-tzvp-d4	pbeh-3c	r2scan-3c
4	Indene	C9H8	3775.01	0.13			https://doi.org/10.1016/0022-2860(79)80291-4	3765.68	3806.42	3767.22	3808.39	3787.69	3824.55	3788.65	3825.71	3827.55	3795.77		0.997528	0.995062	6.11047e-06	2.53188e-05		1.00832	1.01671	6.921e-05	7.4087e-05		0.997936	0.995876	4.26012e-06	3.04421e-05		1.00884	1.01777	7.82064e-05	8.46134e-05		1.00336	1.00673	1.12912e-05	3.76573e-06		1.01312	1.02642	0.000172243	4.25116e-07		1.00361
173			1580.86	0.01				1572.19	1587.54	1573.69	1589.36	1583.01	1597.18	1583.93	1598.26	1597.84	1587.7		0.994518	0.989066	3.00535e-05	3.99584e-06		1.00422	1.00847	1.78423e-05	2.03488e-05		0.995466	0.990953	2.05568e-05	9.17314e-06		1.00538	1.01079	2.89268e-05	3.28588e-05		1.00136	1.00272	1.84224e-06	1.54678e-05		1.01032	1.02075	0.000106583	4.46786e-06		1.00194
			1122.24	0.01				1116.83	1128.05	1117.72	1129.14	1124.21	1134.51	1124.76	1135.16	1135.09	1127.25		0.995182	0.990388	2.3209e-05	7.12091e-06		1.00517	1.01038	2.67753e-05	2.98303e-05		0.995974	0.991964	1.62093e-05	1.25348e-05		1.00615	1.01233	3.77866e-05	4.22662e-05		1.00175	1.00351	3.07877e-06	1.25151e-05		1.01093	1.02199	0.00011957	2.28115e-06		1.00224
								b3lyp-def2-svp-d3bj	b3lyp-def2-tzvp-d3bj	b3lyp-def2-svp-d4	b3lyp-def2-tzvp-d4	pbe0-def2-svp-d3bj	pbe0-def2-tzvp-d3bj	pbe0-def2-svp-d4	pbe0-def2-tzvp-d4	pbeh-3c	r2scan-3c
5	Piperidine	C5H11N	4494.33	0.008			https://doi.org/10.1016/0022-2852(81)90040-0	4482.44	4502.76	4478.91	4499.18	4526.4	4551.21	4525.02	4549.81	4541.18	4500.42		0.997355	0.994716	6.9983e-06	2.35902e-05		1.00188	1.00376	3.5206e-06	4.67689e-06		0.99657	0.993152	1.1765e-05	1.71483e-05		1.00108	1.00216	1.16263e-06	2.04672e-06		1.00714	1.01432	5.09141e-05	3.29306e-06		1.01266	1.02547	0.0001602	3.63365e-08		1.00683
174		axial	4395.29	0.007				4391.81	4411.72	4389.95	4409.84	4431.7	4450.06	4431.15	4449.51	4438.79	4399.61		0.999208	0.998417	6.27328e-07	4.52164e-05		1.00374	1.00749	1.39669e-05	1.6193e-05		0.998785	0.997571	1.4774e-06	4.06075e-05		1.00331	1.00663	1.09492e-05	1.34112e-05		1.00828	1.01663	6.85935e-05	8.73396e-06		1.01246	1.02508	0.000155278	0		1.00816
			2535.62	0.007				2527.48	2536.5	2525.19	2534.12	2552.79	2565.05	2551.95	2564.17	2556.39	2539.05		0.99679	0.993589	1.03072e-05	1.83842e-05		1.00035	1.00069	1.20433e-07	4.00539e-07		0.995884	0.991786	1.69383e-05	1.19041e-05		0.999408	0.998816	3.50512e-07	5.7719e-08		1.00677	1.01359	4.58483e-05	2.10925e-06		1.01161	1.02334	0.000134677	7.19717e-07		1.00644
[truncated: 15 more columns]

## Sheet: Testing (linear tops)
Here, the testing of the scale factors is done at the X-D3(BJ)/def2-TZVP level of theory for the linear top molecules (X=B3LYP, PBE0)
					B3LYP-D3(BJ)/def2-TZVPP			PBE0-D3(BJ)/def2-TZVPP			MAD					rRMSD
			SCALE FACTOR:	>>>>>>>>>>>>>	1.00029	<<<<<<<<<<<<	>>>>>>>>>>>>>	0.987689	<<<<<<<<<<<<		B3LYP-D3(BJ)/def2-TZVPP		PBE0-D3(BJ)/def2-TZVPP			B3LYP-D3(BJ)/def2-TZVPP		PBE0-D3(BJ)/def2-TZVPP
			B0								18.4049	18.9474	32.6423	15.7292		0.668306	0.690705	1.04356	0.318581
			[MHz]		[cm-1]		Source	B3LYP-D3(BJ)/def2-TZVPP	PBE0-D3(BJ)/def2-TZVPP
#	Name	Brutto	Value	Error	Value	Error
6	Carbon monoxide	CO	57636	0.0034			https://doi.org/10.1016/0022-2852(87)90099-3	58231.8	58406	57687	595.862	612.501	770.023	51.0129		0.000106882	0.000112935	0.000178493	7.8338e-07
8	Hydrogen fluoride	HF	616365	0.075			https://doi.org/10.1016/0022-2852(87)90099-3	617584	623878	616198	1218.59	1395.06	7512.67	167.618		3.90876e-06	5.12285e-06	0.000148564	7.39543e-08
29	Hydrogen chloride	HCl	312989	0.0154			https://doi.org/10.1016/0022-2852(87)90099-3	313823	315518	311634	833.873	923.547	2528.57	1355.63		7.09808e-06	8.70681e-06	6.52669e-05	1.87595e-05
47	hydrogen bromide	HBr	250358	0.000364			https://doi.org/10.1016/0022-2852(91)90037-B	250035	251684	248586	322.322	250.874	1326.69	1771.69		1.65751e-06	1.00413e-06	2.80813e-05	5.00785e-05
55	Hydrogen iodide	HI	192658	0.019			https://doi.org/10.1103/PhysRevA.3.1849	193574	195036	192635	916.719	972.033	2378.57	22.4379		2.26413e-05	2.5456e-05	0.000152426	1.35641e-08
1	Hydrogen cyanide	HCN	44316	0.0004			https://doi.org/10.1016/0022-2852(71)90286-4	44940.6	44968.9	44415.3	624.632	637.474	652.955	99.362		0.000198668	0.000206921	0.000217093	5.02713e-06
9	Carbon dioxide	CO2	11688.9		0.3899	0.0005	https://doi.org/10.1007/s00897010521a	11740.2	11803.5	11658.2	51.2701	54.6248	114.56	30.7472		1.92389e-05	2.1839e-05	9.60547e-05	6.91933e-06
26	Carbonyl sulfide	OCS	6081.49	2.4e-05			https://doi.org/10.1007/s11141-016-9634-5	6095.43	6133.16	6057.65	13.9356	15.6774	51.6637	23.8389		5.25087e-06	6.64546e-06	7.2169e-05	1.53657e-05
27	Carbon disulfide	CS2	3271.34	2.09855	0.10912	7e-05	https://doi.org/10.1016/0022-2852(71)90275-X	3277	3297.2	3256.61	5.66673	6.60313	25.8639	14.7265		3.00065e-06	4.07426e-06	6.25083e-05	2.0265e-05
1	Acetylene	C2H2	35334.8	36.6			http://www.e-journals.in/pdf/V7N1/77-82.pdf	35688.5	35660.3	35221.3	353.727	363.925	325.514	113.485		0.000100215	0.000106076	8.48659e-05	1.0315e-05
6	Cyanogen	C2N2	4711.54		0.15716	2e-05	https://doi.org/10.1016/0022-2860(87)80062-5	4756.48	4761.4	4702.78	44.9453	46.3045	49.8598	8.75565		9.10005e-05	9.65875e-05	0.000111989	3.45343e-06
13	Fluoroacetylene	HCCF	9706.18	0.01			https://doi.org/10.1515/zna-1979-0310	9745.1	9806.89	9686.17	38.923	41.7076	100.717	20.0114		1.60811e-05	1.84644e-05	0.000107673	4.25069e-06
32	Chloroacetylene	HCCCl	5684.22	0.005			https://doi.org/10.1515/zna-1978-0209	5702.57	5746.21	5675.47	18.3509	19.9804	61.9902	8.74885		1.04225e-05	1.23556e-05	0.000118934	2.36897e-06
54	bromoacetylene	HCCBr	4000.08	0.03			https://doi.org/10.1515/zna-1977-0811	4000.72	4039.07	3989.34	0.6396	1.7828	38.9875	10.7357		2.5567e-08	1.9864e-07	9.49977e-05	7.20317e-06
5	Cyanoacetylene	HCCCN	4549.06	0.0004			https://doi.org/10.1016/0022-2852(77)90281-8	4590.72	4593.26	4536.71	41.6579	42.9697	44.2011	12.3445		8.38593e-05	8.92238e-05	9.44111e-05	7.36384e-06

## Sheet: Testing (isotopologues)
Here, the testing of the scale factors is done at the X-D3(BJ)/def2-TZVP level of theory for the water isotopologues (X=B3LYP, PBE0)
				B3LYP-D3(BJ)/def2-TZVPP		PBE0-D3(BJ)/def2-TZVPP			MAD					rRMSD
			SCALE FACTOR:		>>>>>>>>>>>>>	0.987689	<<<<<<<<<<<<		B3LYP-D3(BJ)/def2-TZVPP		PBE0-D3(BJ)/def2-TZVPP			B3LYP-D3(BJ)/def2-TZVPP		PBE0-D3(BJ)/def2-TZVPP
			B0						48.8536	#DIV/0!	109.891	26.0236		0.722901	100	1.44365	0.376926
			[MHz]		Source	B3LYP-D3(BJ)/def2-TZVPP	PBE0-D3(BJ)/def2-TZVPP		unscaled	scaled	unscaled	scaled
#	Name	Brutto	Value	Error
		15N(1)	9695.27	0.0006	https://doi.org/10.1016/j.jms.2021.111452	9756.02	9850.35	9729.09	60.7468		155.079	33.8159		3.92578e-05	1	0.000255851	1.21652e-05
			9188.16	0.00059		9218.41	9270.83	9156.7	30.2499		82.6735	31.4556		1.08391e-05	1	8.0961e-05	1.17203e-05
			4716.17	0.00055		4739.8	4775.9	4717.11	23.6255		59.7316	0.937535		2.50947e-05	1	0.000160409	3.95181e-08
		13C(2)	9522.25	0.0012	https://doi.org/10.1016/j.jms.2021.111452	9558.39	9645.52		36.1441		123.271	4.52906		1.44078e-05	1	0.000167587	2.26224e-07
			9353.94	0.0011		9434.07	9493.53		80.1271		139.595	22.7238		7.33786e-05	1	0.000222714	5.90164e-06
			4717.39	0.00035		4747.91	4784.46		30.5248		67.0751	8.17571		4.18699e-05	1	0.000202171	3.00364e-06
		15N(3)	9721.53	0.0017	https://doi.org/10.1016/j.jms.2021.111452	9732.92	9828.18		11.3921		106.651	14.3394		1.37321e-06	1	0.000120354	2.17567e-06
			9135.75	0.0012		9267.87	9320.21		132.128		184.468	69.7312		0.00020917	1	0.000407714	5.82595e-05
			4708.48	0.00066		4747.35	4783.73		38.8726		75.2492	16.3588		6.81595e-05	1	0.000255413	1.2071e-05
		13C(4)	9573.81	0.00053	https://doi.org/10.1016/j.jms.2021.111452	9670.8	9757.97		96.9857		184.161	64.0351		0.000102623	1	0.000370021	4.4737e-05
			9285.9	0.00041		9302.38	9361.39		16.4813		75.4896	39.7543		3.15019e-06	1	6.60886e-05	1.83282e-05
			4712.54	0.00032		4741.51	4777.78		28.9656		65.2435	6.42637		3.77795e-05	1	0.000191675	1.85961e-06
		13C(5)	9632.88	0.00069	https://doi.org/10.1016/j.jms.2021.111452	9618.46	9709.46		14.4217		76.572	42.9568		2.2414e-06	1	6.31869e-05	1.98862e-05
			9223.8	0.00049		9358.18	9413.78		134.385		189.989	74.1005		0.000212267	1	0.000424267	6.45391e-05
			4710.67	0.00035		4743.27	4779.67		32.601		69.0002	10.1598		4.78957e-05	1	0.000214554	4.65165e-06

## Sheet: Testing (HClnW clusters)
Here, the testing of the scale factors is done at the X-D3(BJ)/def2-TZVP level of theory for the water isotopologues (X=B3LYP, PBE0)
				B3LYP-D3(BJ)/def2-TZVPP		PBE0-D3(BJ)/def2-TZVPP			MAD					rRMSD
			SCALE FACTOR:	1.00029	>>>>>>>>>>>>>	0.987689	<<<<<<<<<<<<		B3LYP-D3(BJ)/def2-TZVPP		PBE0-D3(BJ)/def2-TZVPP			B3LYP-D3(BJ)/def2-TZVPP		PBE0-D3(BJ)/def2-TZVPP
			B0						92.57	92.9339	131.914	115.418		5.76734	5.79008	7.86119	6.78277
			[MHz]		Source	B3LYP-D3(BJ)/def2-TZVPP	PBE0-D3(BJ)/def2-TZVPP		unscaled	scaled	unscaled	scaled
#	Name	Brutto	Value	Error
		HCl-2(H2O)	6875.11		https://doi.org/10.1063/1.481152	7223.53	7466.27		348.427	350.491	591.168	499.254		0.00256841	0.00259893	0.00739372	0.00527333
			3198.5			3406.16	3500.25		207.659	208.632	301.748	258.658		0.00421509	0.0042547	0.00890012	0.00653972
			2187.71			2339.24	2409		151.529	152.197	221.288	191.632		0.00479745	0.00483986	0.0102314	0.00767285
		HCl-4(H2O)	2556.95		https://doi.org/10.1126/science.ado7049	2514.94	2558.98		42.0076	41.289	2.03032	29.4721		0.000269906	0.00026075	6.30503e-07	0.000132855
			1010.54			1109.07	1134.98		98.5279	98.8448	124.438	110.466		0.00950624	0.00956749	0.0151635	0.0119495
			853.167			943.063	962.925		89.8959	90.1654	109.757	97.9032		0.0111023	0.0111689	0.01655	0.0131682
					https://doi.org/10.1126/science.ado7049
		HCl-5(H2O)	1546.57			1512.84	1532.38		33.729	33.2967	14.1882	33.0527		0.000475626	0.000463512	8.41619e-05	0.000456745
			1047.5			1104.77	1130.85		57.264	57.5797	83.3484	69.427		0.0029885	0.00302155	0.00633118	0.00439286
			762.718			801.748	820.893		39.0295	39.2586	58.1751	48.0694		0.00261853	0.00264936	0.00581763	0.003972
		HCl-7(H2O)	914.211		https://doi.org/10.1126/science.ado7049	934.807	946.739	935.084	20.5954	20.8625	32.5273	20.8725		0.000507515	0.000520765	0.00126591	0.000521259
			737.09			739.102	749.605	740.376	2.01239	2.22358	12.5144	3.2864		7.45387e-06	9.10052e-06	0.000288259	1.98792e-05
			688.503			708.667	720.288	711.421	20.1643	20.3668	31.7857	22.9185		0.000857736	0.00087505	0.00213133	0.00110806
